# Supplementary material for: The effect of protein supplementation on body muscle mass and fat mass in post-bariatric surgery: a randomized controlled trial (RCT) study protocol
Source: Springer Nature journal article supplement (doi:10.1186/s13690-017-0252-2), 2018-01-22
Supplement: MOESM1 [file 15422392]

# BODY COMPOSITION ANALYZER

# **SC-331S**

## Instruction manual

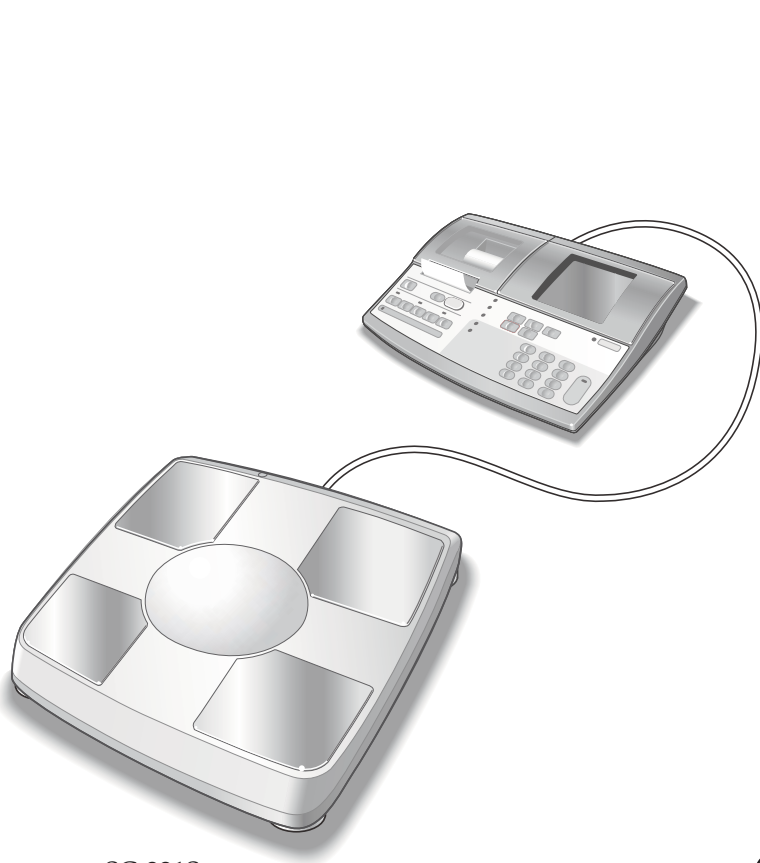

SC-331S

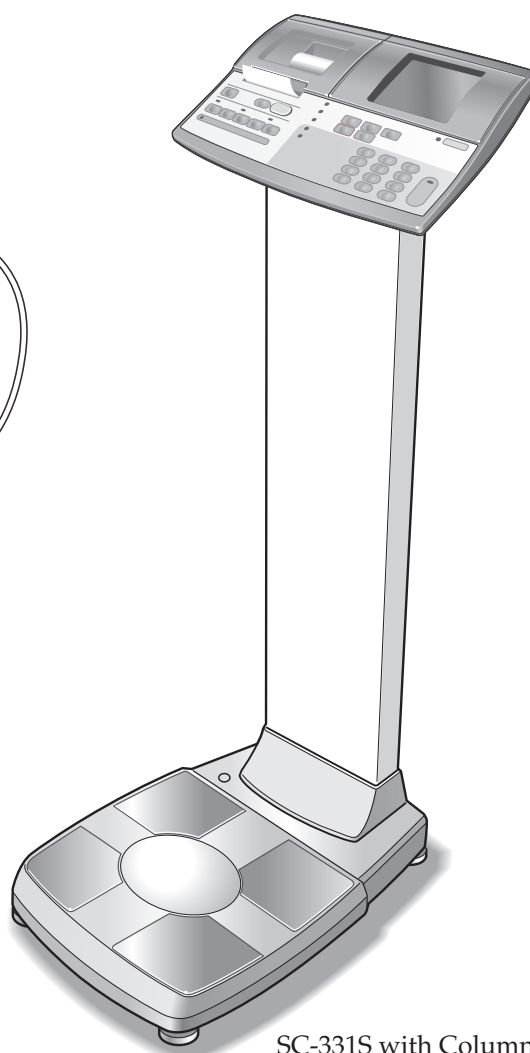

SC-331S with Column Kit

### <Usage Conditions>

Temperature Range for Use : 0°C – 35°C  
Relative Humidity : 30% – 80%  
(without condensation)  
Max Altitude : 2,000m ASL  
Pressure Range of Environment : 86kPa - 106kPa

### <Storage Conditions>

Temperature Range of Environment : -10°C – 60°C  
Range of Relative Humidity : 10% – 90% (without condensation)  
To avoid malfunctions, avoid storing the equipment where there is direct sunlight, significant temperature changes, the risk of dampness, a large amount of dust, in the vicinity of fires, or where there is the risk of receiving vibrations or shocks.

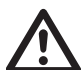

Please read this Instruction Manual carefully and keep it handy for future reference.

## Intended use

- This equipment can be used in the screening of certain adult diseases and conditions related to body weight and composition.
- It can be used in the monitoring and prevention of conditions caused by excessive deposits of fat tissue such as diabetes, hyperlipidemia, cholelithiasis and fatty liver.
- It can be used in the monitoring of changes in individuals' body composition related to differences in the ratio of fat tissue to lean.
- It can be used to assess the effectiveness of individuals' nutrition and exercise programmers, both for health and physical fitness.
- The TANITA Body Composition Analyzer is indicated for use in the measurement of weight and impedance, and the estimation of body mass index (BMI), total body fat percent, total body water percent and weight, muscle mass (skeletal and smooth), physique rating, bone mass, visceral fat rating with healthy range, basal metabolic rate (BMR), metabolic age, and target body fat percent with predicted weight and fat mass, using BIA (Bioelectrical Impedance Analysis).  
The device is indicated for use for healthy children 5-17 years old and healthy adults with active, moderately active, to inactive lifestyles.

## Efficacy

1. This product is simple to use, and requires no specialized facilities or expertise to take measurements.
2. Measurements can be taken quickly and easily, causing minimal inconvenience to the patient during measurements.

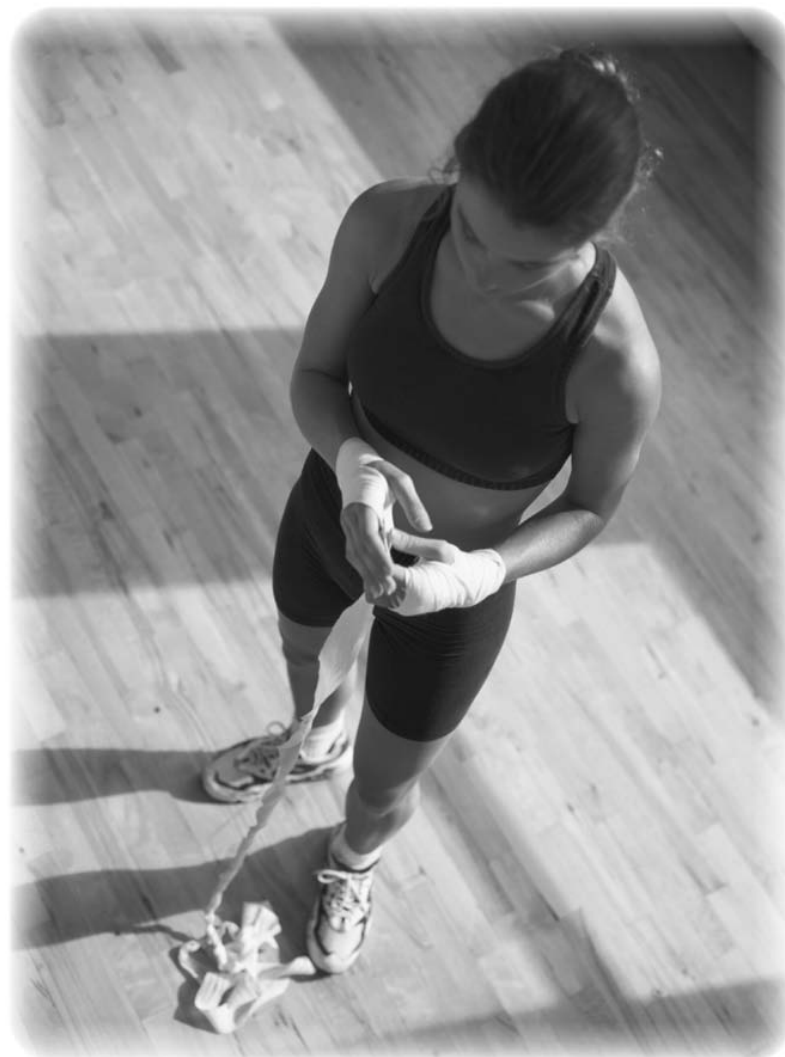

## Contents

### Before use

**Safety Notes** .....4

**Product Assembly and Components**.....8

**Preparation**.....11

**Various settings**.....12

### How to use

**Operating Instructions**.....28

- When using as a body composition analyzer .....28
- Target body fat % .....38
- when using as a scale .....39

**Various criteria**.....42

### When necessary

**Troubleshooting** .....48

**Connection with a personal computer** .....50

**Technical Notes** .....54

**The New Regression Formula for Basal Metabolic Rate (BMR)**.....58

**Specifications** .....60

# For Your Safety

The following outlines precautionary measures to be taken to avoid injury to the users of this device and others, and to prevent damage to property. Please familiarise yourself with the contents to ensure the safe operation of this equipment.

**Warning** Ignoring instructions highlighted with this mark could result in death or severe injury.

**Caution** Ignoring instructions highlighted with this mark could result in injury or damage to property.

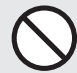

This mark indicates actions that are prohibited.

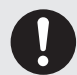

This mark indicates instructions that must always be adhered to.

## Warning

**This device must not be used on subjects with pacemakers or other mechanical implants.**

This device passes a weak electrical current through the body which could interfere with and cause the malfunction of electrical medical implants, resulting in serious repercussions.

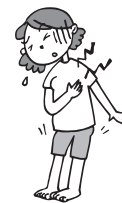

**Do not handle the plug with a wet hand.**

Such action may result in electric shock, fire, or leakage.

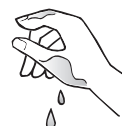

**Keep this equipment away from flammable gas and oxygen rich environment.**

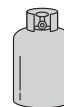

**No modification of this equipment is allowed.**

There is a risk of electrocution or injury. Nor can precise analysis be guaranteed.

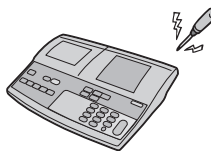

**Do not use double adapters.**

May result in fire.

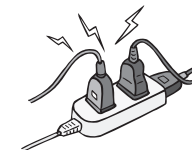

**Use only a correctly wired outlet.**

Only genuine cables and equipments are allowed.

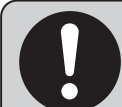

Always...

## Caution

**Keep off wet circumstance.**

**Avoid using on subjects with allergies to metals.**

Allergic reactions may be caused by the stainless steel used in the electrodes of this device.

**Do not jump on the equipment.**

**Do not lean on the equipment.**

Do not use this equipment near other products that emit electromagnetic waves.

**Do not insert fingers into gaps and holes.**

**Avoid impacts on the display.**

The screen panel may split and cause injury.

**Ensure disabled persons do not attempt to use the equipment by themselves.**

A companion must perform the measurements.

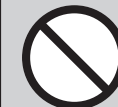

Prohibited

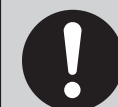

Always...

**Be sure to clean the scale platform with appropriate disinfectant after each use.**

**For your safety to avoid the risk of electric shock and to secure the accuracy, keep a clearance with patients during measuring.**

**Continually monitor both the subject and the equipment for anomalies.**

Should an anomaly with the subject or the equipment be discovered, take appropriate action, such as stopping the equipment, while ensuring the safety of the subject.

**Unplug the equipment from the wall outlet when it will not be in use for long periods of time.**

**Do not interpret analysis results yourself (including evaluating measurements and formulating exercise programmes based on results, etc.).**

Weight loss and exercise based on self-analysis could be detrimental to you health. Always follow the advice of a qualified professional.

**This equipment is designated a Class B IT equipment (mainly for systems intended to be used in domestic environments) and CE (EMC), but weak equipment may be affected.**

If you connect your computer or peripherals, please use the compliance with IEC60601-1 (EN60601-1). Or if using the compliance with IEC60950 (EN60950), power must be supplied from the medical isolating transformer. Keep at a distance of 1.5m between each equipment during operation. If you ignore this requirement, may cause electrical shock of patients or operation.

## For Accurate Measurements

### Avoid measuring after hard exercise.

May result in measurement errors. Please take measurements after sufficient rest.

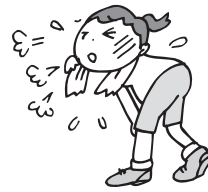

### Avoid measuring after over-eating or over-drinking, and when severely dehydrated.

May result in measurement errors. For greater accuracy, avoid using directly after waking up. Use at the same time on each occasion, at least three hours after eating.

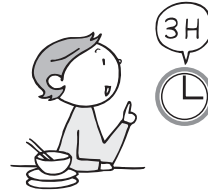

### Do not take measurements while using transmitters, such as mobile phones, which may affect readings.

### Use the device under the same conditions and in the same position as much as possible to track changes.

Readings are greatly affected by the level of hydration and position of the body. Please use at the same time each day, under the same conditions and in the same body position.

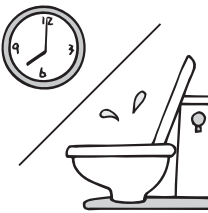

### Avoid measuring in locations of greatly differing temperature.

May result in measurement errors. When the equipment has been moved to a location  $\pm 20^{\circ}\text{C}$ , allow to stand for at least 2 hours before using.

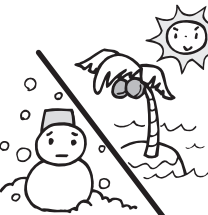

### Bare feet should be placed correctly on the electrode panel for measurement.

Also, make sure the soles of feet are free of excess dirt, as this may also act as a barrier to the mild current.

### Use in a stable location.

Errors in measurements may occur when the device is used in an unstable location.

# Product Assembly and Components

Eng

Before use  
(Product Assembly and Components)

## SC-331S

### Control Box

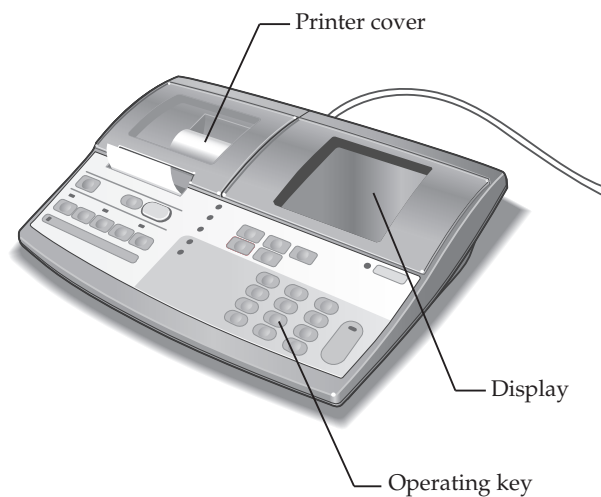

### Platform

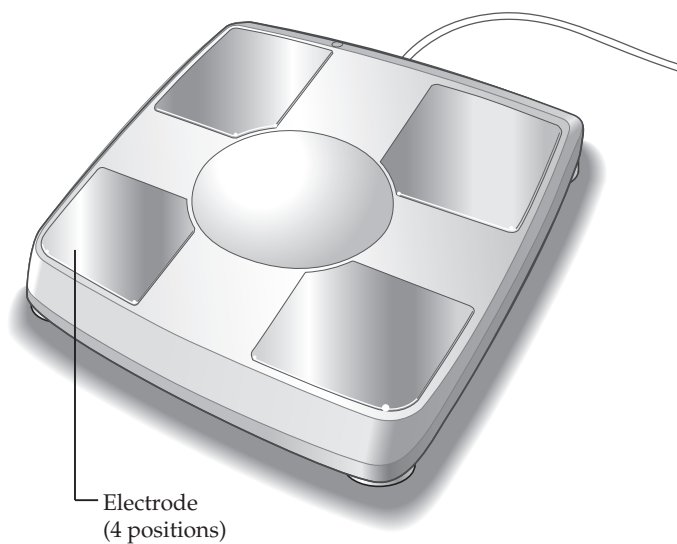

### Accessories

- Instruction manual (This manual)
- Quick reference guide
- CD-ROM (USB driver)
- AC adapter
- Power cord

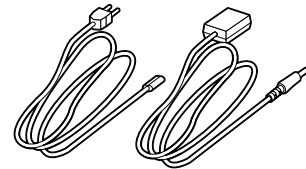

- Dropper (1 item)

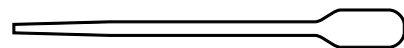

- Printer paper

(Thermal paper, roll diameter:  
2.2in / 55mm, roll length:  
approx. 112ft / 34m)

\* Please contact the agent from  
which you have purchased  
the product for details.

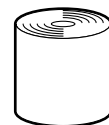

## SC-331S with Column Kit

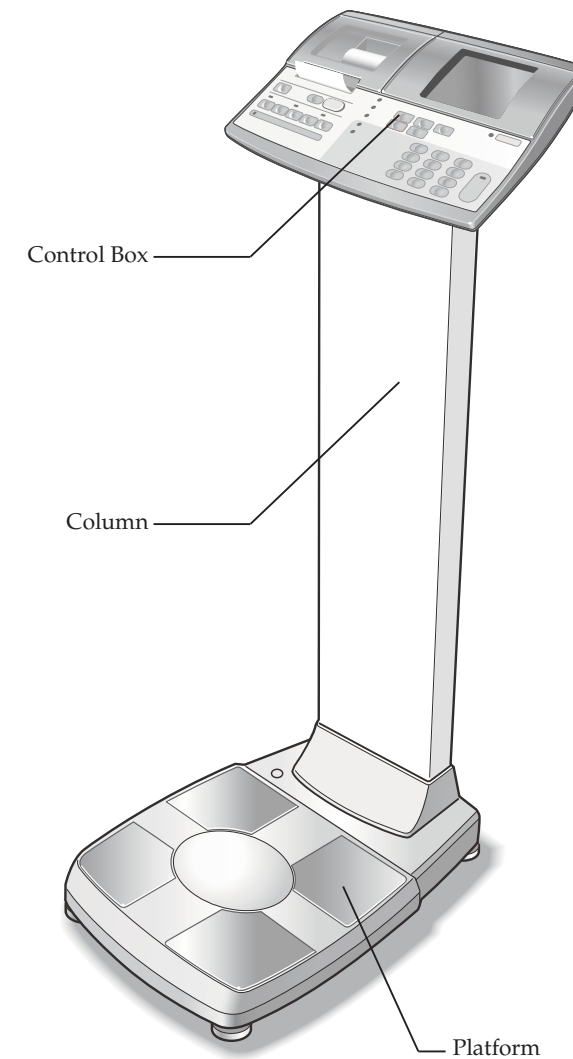

### Accessories

- Instruction manual (This manual)
- Quick reference guide
- CD-ROM (USB driver)
- Assembling guide
- AC adapter
- Power cord

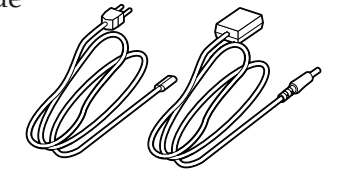

- Hexagonal wrench (1 item)
- Hexagon socket head bolts  
(M5L12) (4 items)

- Dropper (1 item)

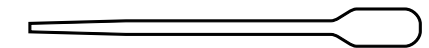

- Printer paper

(Thermal paper, roll diameter:  
2.2in / 55mm, roll length:  
approx. 112ft / 34m)

\* Please contact the agent from  
which you have purchased  
the product for details.

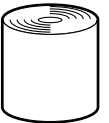

**Caution** Make sure you place the Platform on a stable, level surface. If the Platform is not stable because not all the feet are on the surface, for example, there is a risk of stumbling or inaccurate measurement.

**Caution** Make sure you place the Platform on a stable, level surface. If the Platform is not stable because not all the feet are on the surface, for example, there is a risk of stumbling or inaccurate measurement.

Eng

Before use  
(Product Assembly and Components)



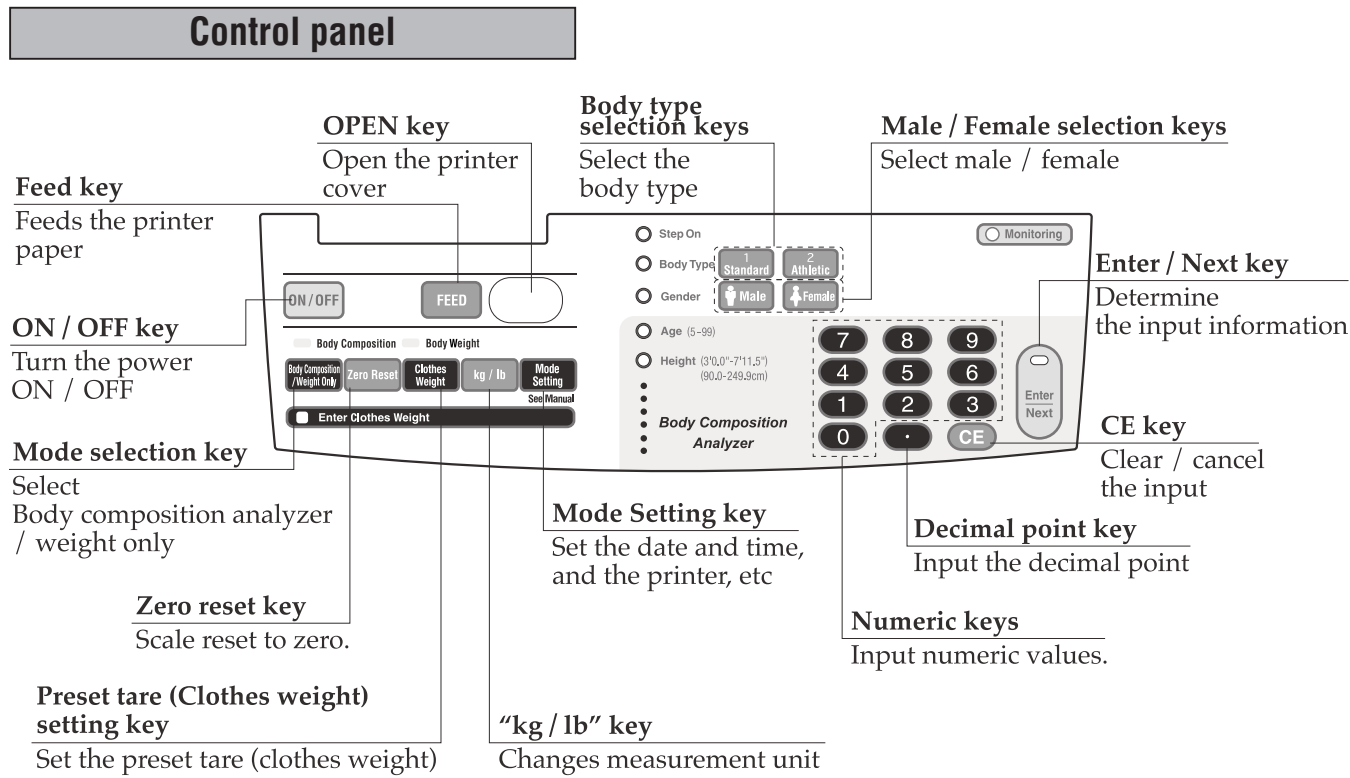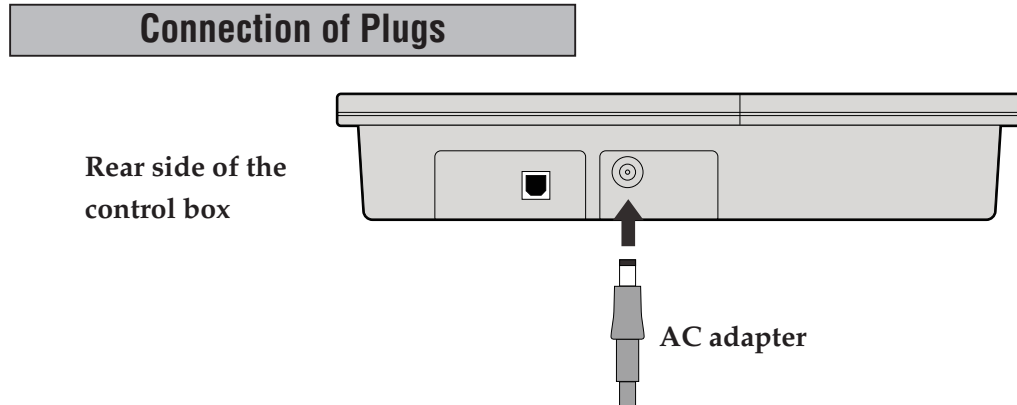

### Warning

- To avoid electric shock, do not insert or remove the plug with wet hands.
- To avoid electric shock, do not use the equipment near water.

### Caution

- To avoid measurement error, do not measure while using equipment that generates radio waves, such as cellular phone.
- Use only the original AC adapter. Using AC adapters other than the original one may cause malfunction, smoke or fire.

### Caution

- Please change the printer paper when red lines appear along the sides of the paper.
- Please pay careful attention to avoid injury from the sharp edge.
- Please turn off the machine before clearing Paper jams.

### Setting of the printer paper

**1** Press **ON/OFF** to turn on the power.

- After all lamps light up, the model number is displayed as **331**, and **00 kg** is displayed.

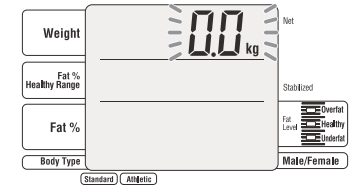

**2** (1) Press **OPEN**.  
(2) Remove the printer cover.

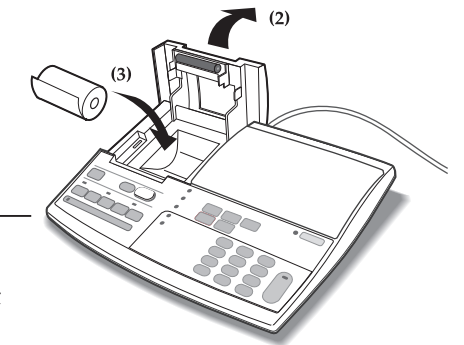

**3** (3) Set up the printer paper

- Remove the adhesive of the printer paper and draw it out approx. 4in / 10cm.

**4** Return the printer cover.

- In the case that **COPE n** is displayed, ⇨ The printer cover is open, so please close it again properly (☞ page 49).

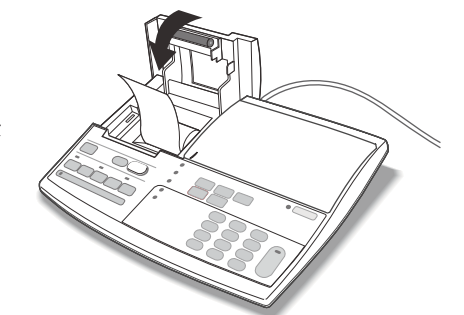

**5** Press the **FEED**, and cut off the excessive paper.

- In the case that the automatic cutting is set to "OFF," the automatic cutting does not function (☞ page 16).

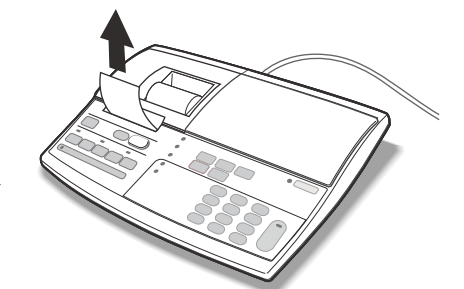

**6** Setting completed.

# Various settings

## Setting methods

Eng

Before use  
(Various settings)

Eng

Before use  
(Various settings)

### Call up the setting item selection screen.

#### 1 Press **ON/OFF** to turn on the power.

- After all lamps light up, the model number is displayed, and **00 kg** is displayed.

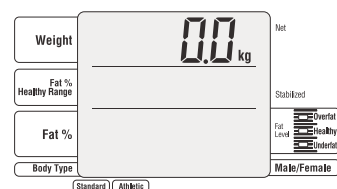

#### 2 Press **Mode Setting**

- The setting item input screen is displayed.

#### Note

- 39 – 64 are the setting items related to print out items (page 24).
- When the various settings are all completed,
  - ⇒ Press **Mode Setting** on the “Setting item selection” screen (it returns to the preset tare input screen).

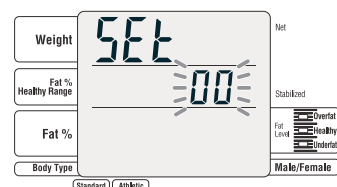

#### Setting items

|     |                                                                  |
|-----|------------------------------------------------------------------|
| 1   | Date and time (page 14)                                          |
| 2   | Number of sheets to print<br>Body composition analyzer (page 16) |
| 3   | Number of sheets to print<br>Weight only mode (page 15)          |
| 4   | Auto Cutting of the printer paper (page 16)                      |
| 5   | Beep sound (page 16)                                             |
| 6   | Display Fat % Healthy range (page 17)                            |
| 7   | ID Number (page 17)                                              |
| 8   | Measurement flow (page 18)                                       |
| 9   | Athletic mode (page 18)                                          |
| 10* | Height increment (page 19)                                       |
| 11  | Automatic determination time (page 19)                           |
| 17  | Wrestler mode (page 20)                                          |
| 18  | Target body fat % (page 21)                                      |
| 19  | Select language (page 21)                                        |
| 20  | Print item preset (page 22)                                      |

\* Invalid in “lb” mode.

#### Print item setting ON/OFF (page 24)

|    |                                 |
|----|---------------------------------|
| 39 | TANITA Logo                     |
| 40 | Category name                   |
| 41 | Date and Time                   |
| 42 | Serial number                   |
| 43 | Memo space                      |
| 44 | ID Number                       |
| 45 | Fat mass                        |
| 46 | Fat free mass                   |
| 47 | Muscle mass                     |
| 48 | Total body water                |
| 49 | Total body water %              |
| 50 | Bone mass                       |
| 51 | Basal metabolic rate            |
| 52 | Metabolic age                   |
| 53 | Visceral fat rating             |
| 54 | BMI                             |
| 56 | Ideal body weight               |
| 57 | Degree of obesity               |
| 58 | Desirable range Body fat        |
| 59 | Indicator - Fat %               |
| 60 | Indicator - BMI                 |
| 61 | Indicator - Visceral fat rating |
| 62 | Indicator - Muscle mass         |
| 63 | Indicator - BMR                 |
| 64 | Physique rating                 |

#### Note

- \* When various settings are continuously carried out,
  - ⇒ press each number to set.
- \* The set contents are memorized until they are changed next time.

\* When various settings are all completed,

⇒ press **Mode Setting** on the “setting item selection screen” (it returns to the preset tare input screen).

## Register the date and time (Continued from page 12).

**3** Press **1** and then press **Enter / Next**.

- The "date and time" setting screen is displayed.

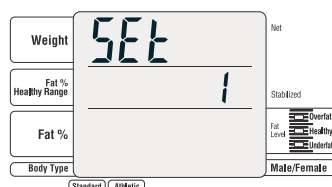

**4** Input the date and time

- Input the year, month, day, hour and minute in order with 2 digits.

Example: In the case to input: 9:47 am January 21<sup>st</sup>, 2009

0 9 0 1 2 1 0 9 4 7

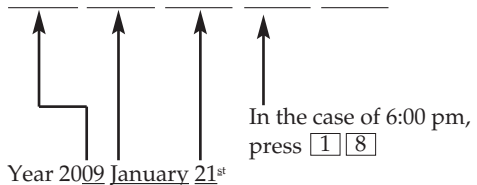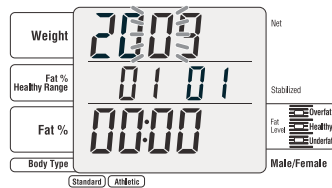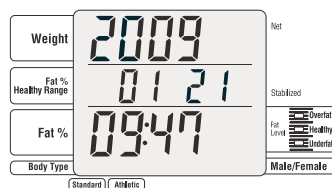

- Note**
- To input a number with 1 digit (0 - 9), first press **0**.
  - To correct the input value, or cancel the input, press **CE** (the input is deleted).
  - To end inputting in midstream, press **Enter / Next**.

**5** After inputting all the items, press **Enter / Next**.

- It returns to the "setting item selection" screen.

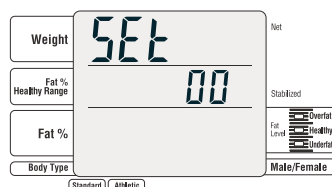

**Note**

- \* When various settings are continuously carried out, press each number to set.
- \* The set contents are memorized until they are changed next time.

## Set the number of sheets to print for the body composition Analyzer (Continued from page 12).

**3** Press **2** and then press **Enter / Next**.

- The "number of sheets to print for the body composition analyzer" setting screen is displayed.

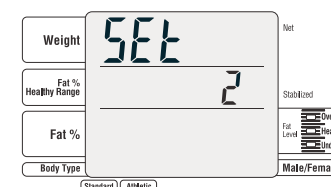

**4** Input the number of sheets to print.

- Note**
- The default is "1" (input range: 0 - 3).
  - In the case that the number of sheets to print is set to "0" for both the body composition analyzer and the scale, **FEED** key does not function.
  - To correct the input value, or cancel the input, press **CE** (the input is deleted).

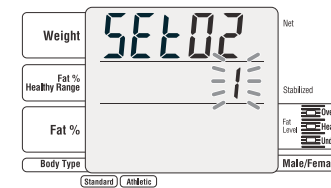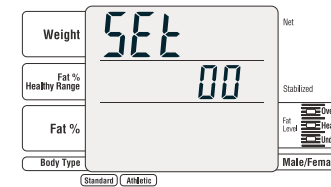

**5** After inputting the numeric value, press **Enter / Next**.

- It returns to the "setting item selection" screen.

## Set the number of sheets to print for the scale (Continued from page 12).

**3** Press **3** and then press **Enter / Next**.

- The "number of sheets to print for the scale" setting screen is displayed.

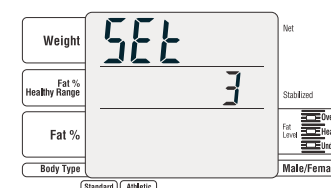

**4** Input the number of sheets to print.

- Note**
- The default is "1" (input range: 0 - 3).
  - In the case that the number of sheets to print is set to "0" for both the body composition analyzer and the scale, **FEED** key does not function.
  - To correct the input value, or cancel the input, press **CE** (the input is deleted).

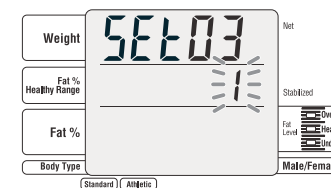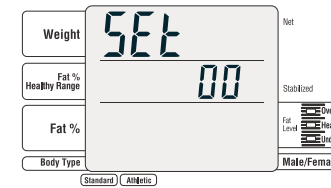

**5** After inputting the numeric value, press **Enter / Next**.

- It returns to the "setting item selection" screen.

- \* When various settings are all completed, press **Mode Setting** on the "setting item selection screen" (it returns to the preset tare input screen).



## Set ON / OFF of the automatic cutting of the printer paper (Continued from page 12).

- 3** Press **4** and then press **Enter / Next**.
- The "ON or OFF of automatic cutting" selection screen is displayed.

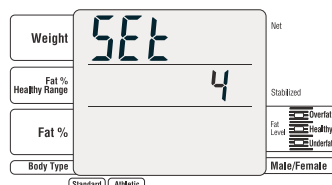

- 4** Set ON or OFF of the automatic cutting.
- Note**
- The default is "0.off." ("1. on" for valid, "0. off" for invalid.)
  - To correct the input value, or cancel the input, ⇨ press **CE** (the input is deleted).

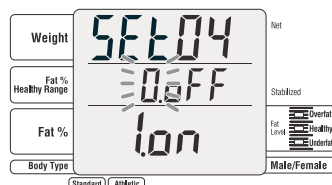

- 5** After inputting the numeric value, press **Enter / Next**.
- It returns to the "setting item selection" screen.

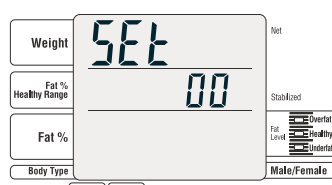

## Set ON / OFF of the beep sound (Continued from page 12).

- 3** Press **5** and then press **Enter / Next**.
- The "ON or OFF of the beep sound" selection screen is displayed.

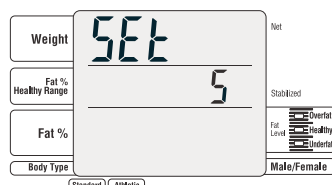

- 4** Set ON or OFF of the beep sound.
- Note**
- The default is "1.on." ("1. on" for valid, "0. off" for invalid.)
  - To correct the input value, or cancel the input, ⇨ press **CE** (the input is deleted).

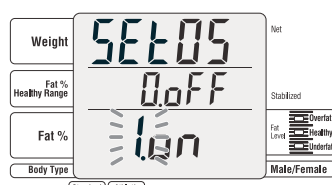

- 5** After inputting the numeric value, press **Enter / Next**.
- It returns to the "setting item selection" screen.

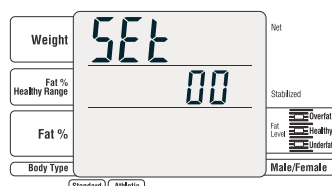

**Note**

- \* When various settings are continuously carried out, ⇨ press each number to set.
- \* The set contents are memorized until they are changed next time.

## Set ON / OFF of the Fat % Healthy range display (Continued from page 12).

- 3** Press **6** and then press **Enter / Next**.
- The "ON or OFF of the Fat % Healthy range" selection screen is displayed.

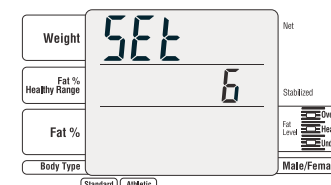

- 4** Set ON or OFF of the Fat % Healthy range display when using the body composition

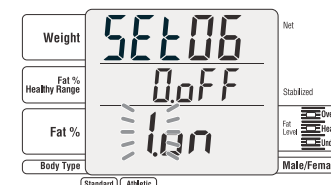

- Note**
- The default is "1.on." ("1. on" for valid, "0. off" for invalid.)
  - To correct the input value, or cancel the input, ⇨ press **CE** (the input is deleted).

- 5** After inputting the numeric value, press **Enter / Next**.
- It returns to the "setting item selection" screen.

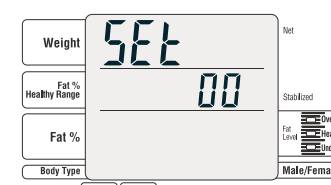

## Set with or without an ID (Continued from page 12).

- 3** Press **7** and then press **Enter / Next**.
- The "with or without an ID" setting screen is displayed.

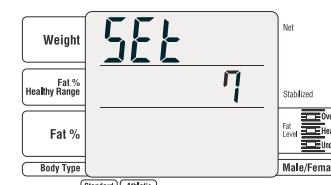

- 4** Set with or without an ID.
- Note**
- The default is "0.off." ("1. on" for valid, "0. off" for invalid.)
  - To correct the input value, or cancel the input, ⇨ press **CE** (the input is deleted).

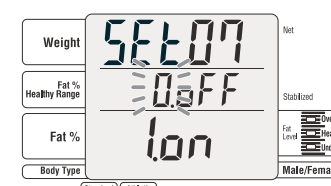

- 5** After inputting the numeric value, press **Enter / Next**.
- It returns to the "setting item selection" screen.

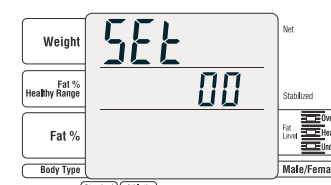

- \* When various settings are all completed, ⇨ press **Mode Setting** on the "setting item selection screen" (it returns to the preset tare input screen).

# Various settings (Setting methods (continued))

Eng

Before use  
(Various settings)

## Select the measurement flow (Continued from page 12).

**3** Press **8** and then press **Enter / Next**.

- The "ON or OFF of the one step mode" selection screen is displayed.

**Note**

- The one step mode is
  - a mode to measure body weight after inputting personal information.

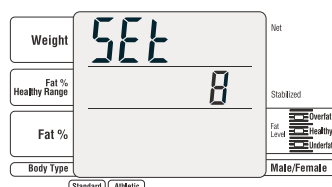

**4** Set ON or OFF of the one step mode when using the body composition analyzer.

**Note**

- The default is "0. off." ("1. ON" for valid, "0. off" for invalid.)
- To correct the input value, or cancel the input,
  - press **CE** (the input is deleted).

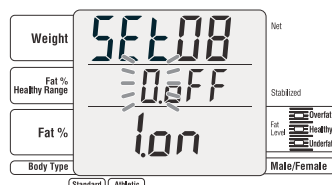

**5** After inputting the numeric value, press **Enter / Next**.

- It returns to the "setting item selection" screen.

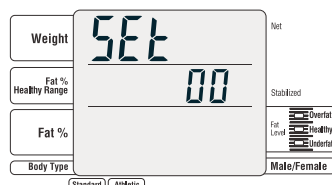

## Set ON or OFF of the athletic mode selection (Continued from page 12).

**3** Press **9** and then press **Enter / Next**.

- The "Set ON / OFF of the athletic mode selection" setting screen is displayed.

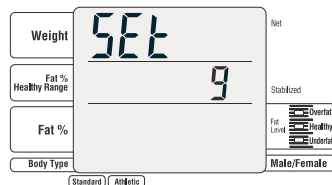

**4** Set ON or OFF of the athletic mode selection when using the body composition analyzer.

**Note**

- The default is "1. on." ("1. on" for valid, "0. off" for invalid.)
- To correct the input value, or cancel the input,
  - press **CE** (the input is deleted).

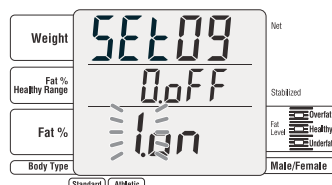

**5** After inputting the numeric value, press **Enter / Next**.

- It returns to the "setting item selection" screen.

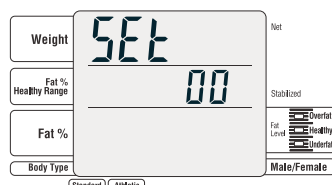

**Note**

- When various settings are continuously carried out,
  - press each number to set.
- The set contents are memorized until they are changed next time.

Eng

Before use  
(Various settings)

## Set the height increment (Continued from page 12).

**3** Press **1 0** and then press **Enter / Next**.

- The "height increment" selection screen is displayed.
- \* Invalid in "lb" mode.

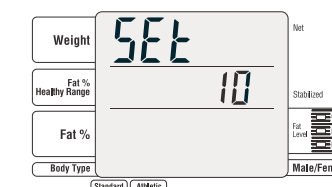

**4** Selects the height increment.

**Note**

- The default is "1. on" (1 cm / 0.5 in).
  - 0. off: sets 0.1 cm increment
  - 1. on: sets 1 cm / 0.5 in increment
- To correct the input value, or cancel the input,
  - press **CE** (the input is deleted).

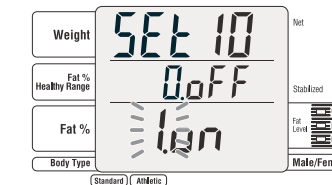

**5** After inputting the numeric value, press **Enter / Next**.

- It returns to the "setting item selection" screen.

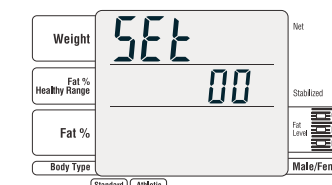

## Set the automatic determination time when inputting (Continued from page 12).

**3** Press **1 1** and then press **Enter / Next**.

- The "automatic determination time when inputting" setting screen is displayed.

**Note**

- Automatic determination when inputting is,
  - a function to determine the input value automatically even without pressing **Enter / Next**, after inputting the numeric value.

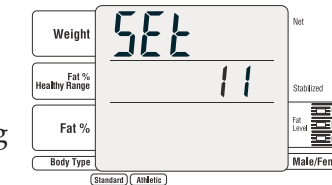

**4** Set the automatic determination time when inputting.

**Note**

- The default is 5 seconds ("5"). (input range: 0 - 9).
- \*If "0" is set, it is not automatically determined.
- To correct the input value, or cancel the input,
  - press **CE** (the input is deleted).

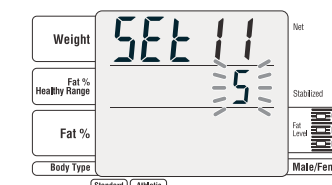

**5** After inputting the numeric value, press **Enter / Next**.

- It returns to the "setting item selection" screen.

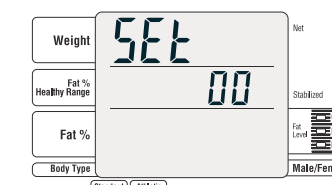

\*When various settings are all completed,
 

- press **Mode Setting** on the "setting item selection screen" (it returns to the preset tare input screen).

## Set ON / OFF of Wrestler mode (Continued from page 12).

**3** Press **1** **7** and then press **Enter / Next**.

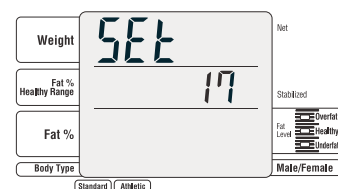

**4** Set ON or OFF of Wrestler mode.

**Note**

- The default is 0.off
- 0: Set Wrestler mode off
- 5: Set Wrestler mode 5%
- 7: Set Wrestler mode 7%
- When the "Wrestler Mode" is activated, the SC-331S automatically calculates the Minimum Wrestling Weight at a predetermined minimum body fat %. The 1996 ACSM Position Stand "Weight Loss in Wrestlers" as adopted by the NCAA recommends the following MINIMUM body fat % as follows:

5% for Collegiate Athletes (male)

7% for High School Athletes (male)

**!** The target body fat % value is completely separate from the Minimum Wrestling Weight (Min Weight) calculations.

For example:

The target body fat % value may be entered as 15%, even though the Min Weight is calculated at a predetermined minimum body fat of 5 or 7%.

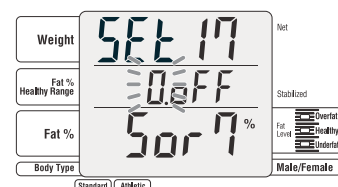

**5** After inputting the numeric value, press **Enter / Next**.

- It returns to the "setting item selection" screen.

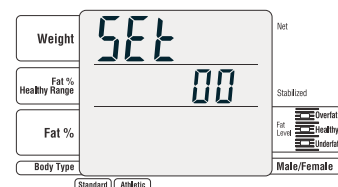

**Note**

- \* When various settings are continuously carried out,  $\Rightarrow$ press each number to set.
- \* The set contents are memorized until they are changed next time.

## Set ON / OFF of the target body fat % (Continued from page 12).

**3** Press **1** **8** and then press **Enter / Next**.

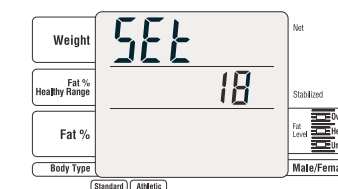

**4** Set ON or OFF of the target body fat %.

**Note**

- The default is "0. off" ("1. on" for valid, "0. off" for invalid.)
- To correct the input value, or cancel the input,  $\Rightarrow$ press **CE** (the input is deleted).

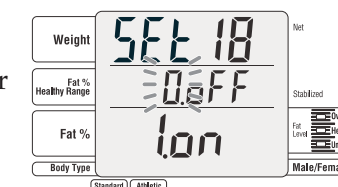

**5** After inputting the numeric value, press **Enter / Next**.

- It returns to the "setting item selection" screen.

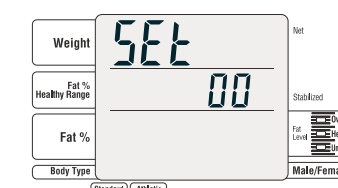

## Set print language (Continued from page 12).

**3** Press **1** **9** and then press **Enter / Next**.

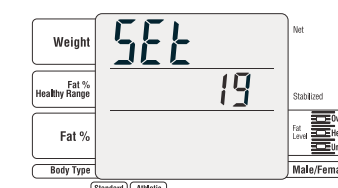

**4** Set the print language.

**Note**

- 1: English / 2: French / 5: Spanish / 7: Portuguese
- To correct the input value, or cancel the input,  $\Rightarrow$ press **CE** (the input is deleted).

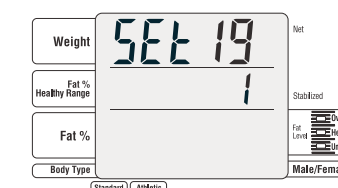

**5** After inputting the numeric value, press **Enter / Next**.

- It returns to the "setting item selection" screen.

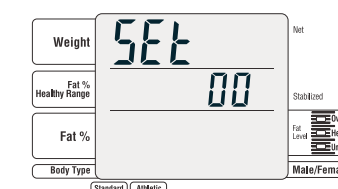

- \* When various settings are all completed,  $\Rightarrow$ press **Set Up** on the "setting item selection screen" (it returns to the preset tare input screen).

# Various settings Setting methods (continued)

Eng

Before use  
(Various settings)

## Set the print item preset (Continued from page 12).

**3** Press **2** **0** and then press **Enter / Next**.

- The “print out preset” setting screen is displayed.

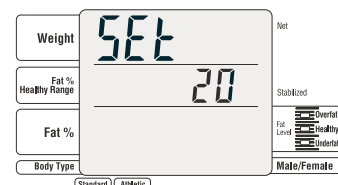

**4** Set the print item preset.

- Set with **1** - **3**.

- Note**
- The print items preset are  $\Rightarrow$  a function to set the print items of the pattern 1 - 3 to ON automatically at once (page 23). The default is “1” (pattern 1).
  - When ON or OFF of print items are changed with the “setting of the print out item” after the print out preset (page 26), the state set for the last time is valid.

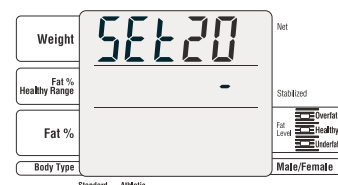

**5** After inputting the numeric value, press **Enter / Next**.

- It returns to the “setting item selection” screen.

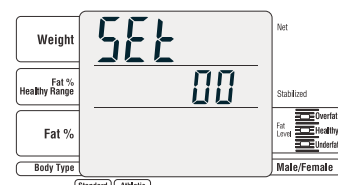

**Note**

- \* When various settings are continuously carried out,  $\Rightarrow$  press each number to set.
- \* The set contents are memorized until they are changed next time.

## [Lists of contents of the print item preset]

| Print item                    | Body composition analyzer |          |       |             |          |       |             |          |       | Scale |
|-------------------------------|---------------------------|----------|-------|-------------|----------|-------|-------------|----------|-------|-------|
|                               | 1 Pattern 1               |          |       | 2 Pattern 2 |          |       | 3 Pattern 3 |          |       |       |
|                               | Standard                  | Athletic | Child | Standard    | Athletic | Child | Standard    | Athletic | Child |       |
| Body type                     | ✓                         | ✓        | ✓     | ✓           | ✓        | ✓     | ✓           | ✓        | ✓     |       |
| TANITA Logo                   | ✓                         | ✓        | ✓     | ✓           | ✓        | ✓     | ✓           | ✓        | ✓     |       |
| Category name                 | ✓                         | ✓        | ✓     | ✓           | ✓        | ✓     | ✓           | ✓        | ✓     | ✓     |
| Date and time                 | ✓                         | ✓        | ✓     | ✓           | ✓        | ✓     | ✓           | ✓        | ✓     | ✓     |
| Serial number                 | ✓                         | ✓        | ✓     | ✓           | ✓        | ✓     | ✓           | ✓        | ✓     | ✓     |
| Memo Space                    | ✓                         | ✓        | ✓     | ✓           | ✓        | ✓     | ✓           | ✓        | ✓     |       |
| ID No                         | ✓                         | ✓        | ✓     | ✓           | ✓        | ✓     | ✓           | ✓        | ✓     | ✓     |
| Fat mass                      | ✓                         | ✓        | ✓     | ✓           | ✓        | ✓     |             |          |       |       |
| Fat free mass                 | ✓                         | ✓        | ✓     | ✓           | ✓        | ✓     |             |          |       |       |
| Muscle mass                   | ✓                         | ✓        |       | ✓           | ✓        |       |             |          |       |       |
| Total body water              | ✓                         | ✓        |       | ✓           | ✓        |       |             |          |       |       |
| Total body water %            | ✓                         | ✓        |       | ✓           | ✓        |       |             |          |       |       |
| Bone mass                     | ✓                         | ✓        |       | ✓           | ✓        |       |             |          |       |       |
| BMR                           | ✓                         | ✓        |       | ✓           | ✓        |       |             |          |       |       |
| Metabolic age                 | ✓                         | ✓        |       | ✓           | ✓        |       |             |          |       |       |
| Visceral fat rating           | ✓                         | ✓        |       | ✓           | ✓        |       |             |          |       |       |
| BMI                           | ✓                         | ✓        | ✓     | ✓           | ✓        | ✓     | ✓           | ✓        | ✓     |       |
| Ideal body weight             | ✓                         |          |       | ✓           |          |       |             |          |       |       |
| Degree of obesity             | ✓                         |          |       | ✓           |          |       |             |          |       |       |
| Desirable range               | ✓                         | ✓        | ✓     |             |          |       |             |          |       |       |
| Wrestler Mode                 |                           |          |       |             |          |       |             |          |       |       |
| Indicator Fat %               | ✓                         | ✓        | ✓     | ✓           | ✓        | ✓     |             |          |       |       |
| Indicator BMI                 | ✓                         | ✓        |       | ✓           | ✓        |       |             |          |       |       |
| Indicator Visceral fat rating | ✓                         | ✓        |       |             |          |       |             |          |       |       |
| Indicator Muscle mass         | ✓                         | ✓        |       |             |          |       |             |          |       |       |
| Indicator BMR                 | ✓                         | ✓        |       |             |          |       |             |          |       |       |
| Physique rating               | ✓                         | ✓        |       |             |          |       |             |          |       |       |

- The items marked with “✓” are printed.
- The items marked with “✓” can be selected to print (page 24)
- \* See page 24 for an example of preset print.

- \* When various settings are all completed,  $\Rightarrow$  press **Mode Setting** on the “setting item selection screen” (it returns to the preset tare input screen).

Eng

Before use  
(Various settings)



# Various settings Setting methods (continued)

Eng  
Before use  
(Various settings)

[In the case to select the print item preset "1"]

**TANITA**  
BODY COMPOSITION ANALYZER SC-331S

OCT/14/2009 18:21  
SERIAL No. 00000002

**LOGO**

**Serial No.**  
• The default is 00000001.  
Adds 1 each time it measures.

**ID**  
• When it is set with an ID, it is printed out. (The default is without an ID.)

**Fat %**  
• Fat % is amount of body fat as a proportion of body weight.

**FFM**  
• Fat Free Mass is comprised of muscle, bone, tissue, water, and all other fat free mass in the body.

**TBW\***  
• Total Body Water is the amount of water retained in the body. TBW is said to comprise between 50% - 70% of total body weight. Generally, men tend to have higher water weight than women due to a greater amount of muscle.

**Bone mass\***  
• Bone mineral amount included in the entire bone.

**Metabolic age\***  
• Metabolic age is evaluated young when a muscular amount is larger, and BMR is higher.

**BMI**  
• Calculated with "weight (kg) / height (m)<sup>2</sup>"  
• The standard value is for the Standard mode. In the case of the Athletic mode, the standard value is just a reference. And for those who are 17 years old or younger, only the body fat % is displayed as the standard value. The muscle mass, total body water and the estimated bone mass for those who are 17 years old or younger are for reference.

**Category name**

**Weight**  
• Measured weight.

**Fat mass**  
• Total weight of fat mass in the body.

**Muscle mass\***  
• Bone-free lean tissue mass (LTM)

**TBW %\***

**BMR\***  
• Basal Metabolic Rate represents the total energy expended by the body to maintain normal functions at rest such as respiration and circulation.

**Visceral fat rating\***  
• Visceral fat rating feature indicates the rating of visceral fat.

**Ideal body weight\***  
• Ideal body weight is a value for which the BMI is 22.

**Degree of obesity\***  
• Calculated as (weight - Ideal body weight) / Ideal body weight × 100.

**Impedance**  
• Impedance (This does not affect judgment of the measurement results.)

**INPUT**  
ID No. 000000123  
BODY TYPE STANDARD  
GENDER MALE  
AGE 36  
HEIGHT 170.4cm  
CLOTHES WEIGHT 1.0kg

**RESULT**  
WEIGHT 64.4kg  
FAT % 13.9 %  
FAT MASS 9.0kg  
FFM 55.4kg  
MUSCLE MASS 52.6kg  
TBW 39.2kg  
TBW % 60.9 %  
BONE MASS 2.8kg  
BMR 6678 kJ  
1596kcal  
METABOLIC AGE 21  
VISCERAL FAT RATING 4  
BMI 22.2  
IDEAL BODY WEIGHT 63.9kg  
DEGREE OF OBESITY 0.8 %

**DESIRED RANGE**  
FAT % 8.0-19.9 %  
FAT MASS 4.8-13.8kg

**Target**  
TARGET BF% is: 10 %  
Predicted weight: 61.6kg  
Predicted fat mass: 6.2kg  
FAT TO LOSE: 2.8kg

Consult your physician before beginning any weight management program. Tanita is not responsible for determining your targetBF%.

**INDICATOR**  
\*FAT %  
- | 0 | + | ++  
\*BMI  
- | 0 | + | ++  
\*VISCERAL FAT RATING  
| 13  
\*MUSCLE MASS  
- | 0 | +  
\*BMR  
- | 0 | +  
\*PHYSIQUE RATING  
STANDARD  
\*IMPEDANCE 481.2 Ω

\*18 - 99 years only

Please consult your doctor before you start a body weight management program. Tanita is not responsible for the target body fat ratio.

[In the case to select the print item preset "2"]

**TANITA**  
BODY COMPOSITION ANALYZER SC-331S

OCT/14/2009 18:22  
SERIAL No. 00000003

**INPUT**  
ID No. 000000123  
BODY TYPE STANDARD  
GENDER MALE  
AGE 36  
HEIGHT 170.4cm  
CLOTHES WEIGHT 1.0kg

**RESULT**  
WEIGHT 64.4kg  
FAT % 13.7 %  
FAT MASS 8.8kg  
FFM 55.6kg  
MUSCLE MASS 52.8kg  
TBW 39.5kg  
TBW % 61.3 %  
BONE MASS 2.8kg  
BMR 6699 kJ  
1601kcal  
METABOLIC AGE 21  
VISCERAL FAT RATING 4  
BMI 22.2  
IDEAL BODY WEIGHT 63.9kg  
DEGREE OF OBESITY 0.8 %

**Target**  
TARGET BF% is: 10 %  
Predicted weight: 61.8kg  
Predicted fat mass: 6.2kg  
FAT TO LOSE: 2.6kg

Consult your physician before beginning any weight management program. Tanita is not responsible for determining your targetBF%.

**INDICATOR**  
\*FAT %  
- | 0 | + | ++  
\*BMI  
- | 0 | + | ++  
\*IMPEDANCE 473.0 Ω

[In the case to select the print item preset "3"]

**TANITA**  
BODY COMPOSITION ANALYZER SC-331S

OCT/14/2009 18:23  
SERIAL No. 00000004

**INPUT**  
ID No. 000000123  
BODY TYPE STANDARD  
GENDER MALE  
AGE 36  
HEIGHT 170.4cm  
CLOTHES WEIGHT 1.0kg

**RESULT**  
WEIGHT 64.4kg  
FAT % 13.8 %  
BMI 22.2

**Target**  
TARGET BF% is: 10 %  
Predicted weight: 61.7kg  
Predicted fat mass: 6.2kg  
FAT TO LOSE: 2.7kg

Consult your physician before beginning any weight management program. Tanita is not responsible for determining your targetBF%.

\*IMPEDANCE 478.2 Ω

Please consult your doctor before you start a body weight management program. Tanita is not responsible for the target body fat ratio.

Eng  
Before use  
(Various settings)



# Various settings (Setting methods (continued))

Eng

Eng

Before use  
(Various settings)

Before use  
(Various settings)

## Set the items to print out (Continued from page 12).

**3** Select the number to set with the numeric keys ( **3** **9** - **6** **4** ) and press **Enter / Next** .

- The setting screen is displayed.

### Note

- See the next page for the setting number of each item.
- When the print item preset is set, after setting the items to print out (☞ page 24), the items to print may be changed automatically. Please confirm, "Print items preset list" (☞ page 23).

<In the case of selecting 39>

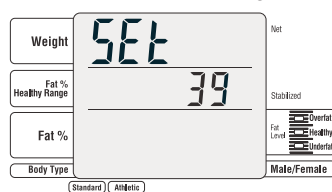

## Print item setting ON / OFF

|    |                            |
|----|----------------------------|
| 39 | TANITA Logo                |
| 40 | Category name              |
| 41 | Date and Time              |
| 42 | Serial number              |
| 43 | Memo space                 |
| 44 | ID Number                  |
| 45 | Fat mass                   |
| 46 | Fat free mass              |
| 47 | Muscle mass                |
| 48 | Total body water           |
| 49 | Total body water %         |
| 50 | Bone mass                  |
| 51 | Basal metabolic rate (BMR) |

|    |                                 |
|----|---------------------------------|
| 52 | Metabolic age                   |
| 53 | Visceral fat rating             |
| 54 | BMI                             |
| 56 | Ideal body weight               |
| 57 | Degree of obesity               |
| 58 | Desirable range Body fat %      |
| 59 | Indicator - Fat %               |
| 60 | Indicator - BMI                 |
| 61 | Indicator - Visceral fat rating |
| 62 | Indicator - Muscle mass         |
| 63 | Indicator - BMR                 |
| 64 | Physique rating                 |

**4** Selects ON or OFF of the item to print out.

### Note

- "0. off" is not to print out and "1. on" is to print out.
- To correct the input value, or cancel the input, ☞press **CE** (the input is deleted).

< In the case of selecting the logo setting on. >

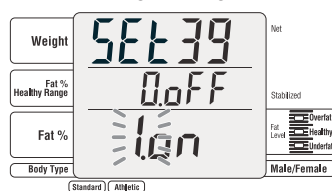

**5** After inputting the numeric value, press **Enter / Next** .

- It returns to the "setting item selection" screen.

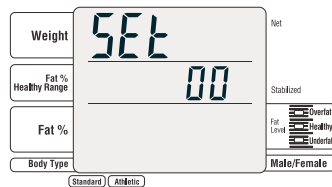

### Note

- \* When various settings are continuously carried out, ☞press each number to set.
- \* The set contents are memorized until they are changed next time.

- \* When various settings are all completed, ☞press **Mode Setting** on the "setting item selection screen" (it returns to the preset tare input screen).

**!** This explains the procedure when the printer is turned on. Please be aware that the display may be different if the number of sheets to print is set to **0**.

- !** Do not wipe the equipment with corrosive chemicals (gasoline, cleaner, etc.). Please use a neutral detergent to clean the equipment.
- When the equipment has been transferred to any location where there is a temperature difference of 36°F / 20°C or more, wait for at least two hours before using it.
- In taking measurements, please keep the person away from the unit, who uses transmitters such as a cellular phone avoid causing margin errors.
- The SC-331S estimates the various outputs specified in the Specification Section of this Manual. Keep in mind that there are many factors that can influence the accuracy of these measurements. Please refer to the General Instructions Section of this manual as this will help you minimize the variability (inaccuracy) of the measurements.

**About Athletic Mode**

- It is recommended for those who are 18 years old or older and meet the following conditions to select "Athletic Mode" and measure as reference values.
  - Those who exercise for 12 hours or more per a week.
  - Those who belong to a sport team or a sport organization with the aim of participation in competition, etc.
  - Those who exercise to build up like a bodybuilder.
  - Those who are professional athletes.

**Attention**

- The posture when measuring
  - Stand with both feet parallel on the electrodes.
  - Stand fullface without bending knees.
- The age input range is 5 – 99 years old.
  - Input age 99 for those who are 100 years old or older.

**Note**

- False results may be reported after excessive food/fluid intake, or after periods of intense exercise.
- When the user is 18 years or older, Athletic mode can be used.
- When Clothes weight is input, Clothes weight is subtracted from measurements and it displays it as Weight.
- "One step mode" should be the default.
- "Option mode" should move to back of "One step mode" page.

**In the case of the "one step mode"**

In the one step mode, after inputting the personal data, the weight and body composition are measured.

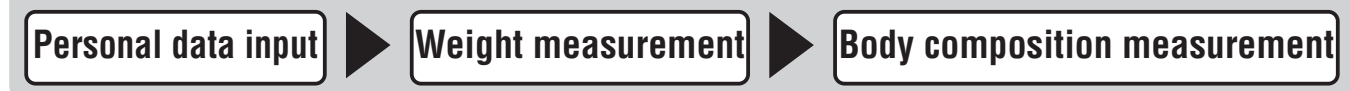

**1** Press **ON/OFF** to turn on the power.

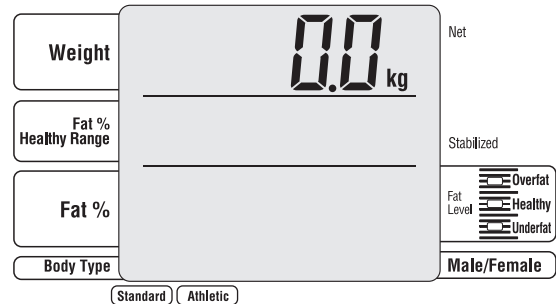

(kg mode)

**2** Check that the body composition is selected, **input weight of clothing.** Input it by pressing **0** - **9** and **.**

**Note**

- The clothes weight (preset tare) can be input in the range of 0.0-20.0lb or 0.0-10.0kg.
  - \*0.2lb / 0.1kg increments
  - \*Unit is changed by **kg / lb** key.
- If it is mistakenly input,
  - >press **CE** (the input is deleted).

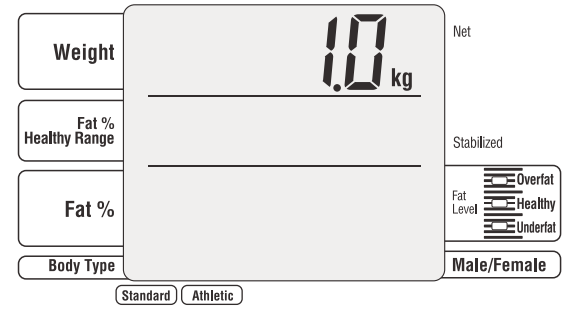

**3** Press **Enter / Next**.

**Note**

- This screen is not displayed if OFF is set in the "setting with or without an ID" (page 17). (The "body type selection" screen is displayed.)

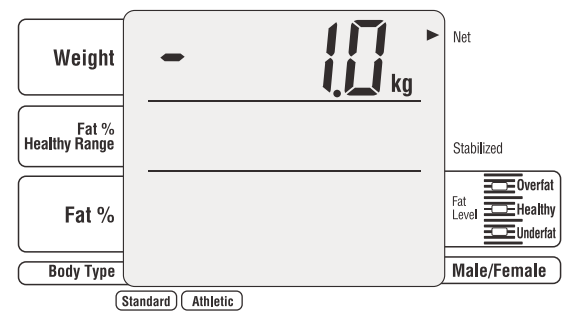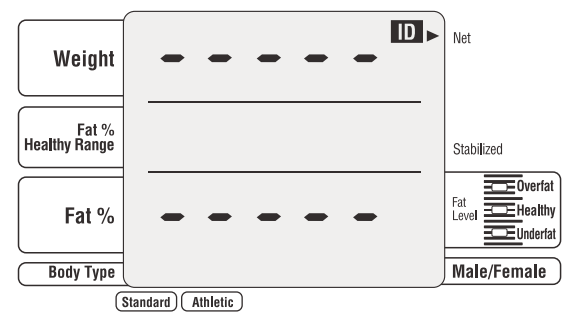

**4** Input ID number. Input it by pressing **0** - **9**.

**Note**

- This screen is not displayed if OFF is set in the "setting with or without an ID" (page 17).
- The ID number can be input from 0 – 999999999. If **Enter / Next** is pressed, the non-inputted digits are filled with 0s.
- If it is mistakenly input,
  - >press **CE** (the input is deleted).
- If **CE** is pressed in the state that an ID number is not input, it returns to the "measurement start" screen.

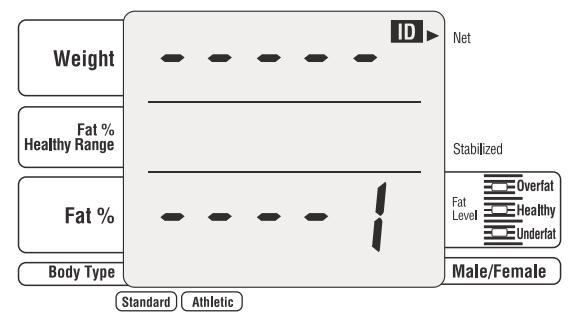

## 5 Select body type.

Press the body type selection keys to input. When the body type is selected, the lamp flashes on the "Gender".

### Note

- This screen is not displayed if OFF is set in the "setting ON or OFF of the athletic mode selection" (page 18).
- The body type can also be selected with the numeric keys ( 1 2 ).
- If it is mistakenly input,
  - ⇨ press **CE** (the input is deleted, and it returns to the "body type selection" screen).
- If **CE** is pressed in the state that the body type is not input, it returns to the "ID number input" screen (or "measurement start" screen).

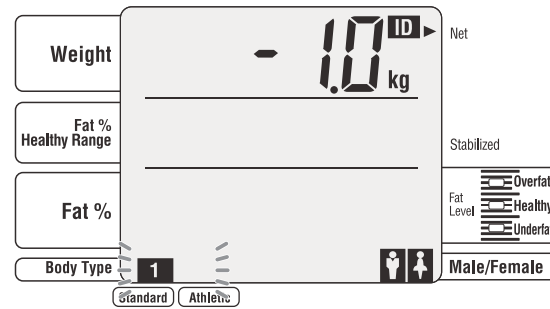

## 6 Select gender.

Press the male / female selection keys to input. When male or female is selected, the lamp flashes on the "Age".

### Note

- If it is mistakenly input,
  - ⇨ press **CE** (the input is deleted, and it returns to the "gender selection" screen).
- If **CE** is pressed in the state that the male or female is not selected, it returns to the "body type selection" screen.

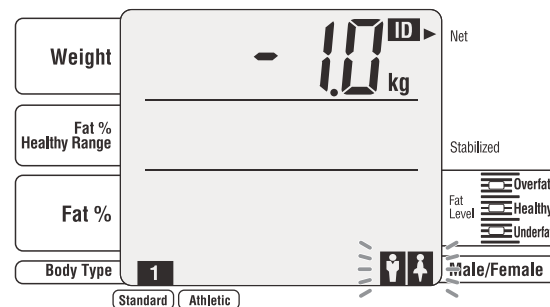

## 7 Input age.

Input it by pressing 0 - 9.

### Note

- The age can be input from 5 - 99.
- If it is mistakenly input,
  - ⇨ press **CE** (the input is deleted).
- If **CE** is pressed in the state that the age is not input, it returns to the "gender selection" screen.

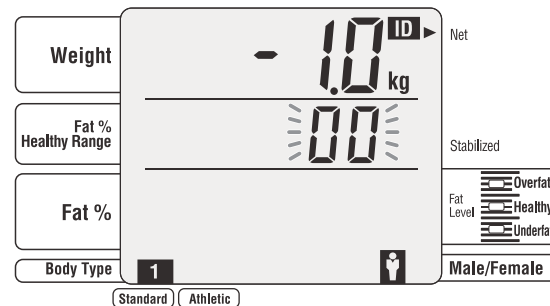

## 8 Press Enter / Next.

When the age is input, the lamp flashes on the "Height".

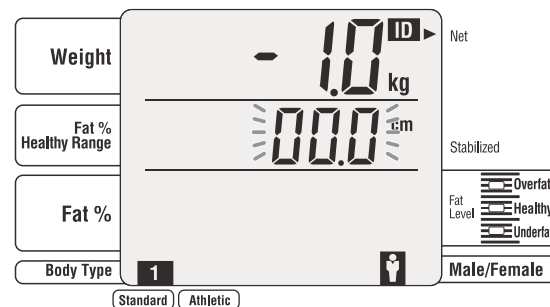

## 9 Input height.

Input it by pressing 0 - 9.

### Note

- The height can be input from 3ft -7ft11.5in / 90.0-249.9cm.
  - \*Unit is changed by **kg / lb** key.
- If it is mistakenly input,
  - ⇨ press **CE** (the input is deleted).
- If **CE** is pressed in the state that the height is not input, it returns to the "age input" screen.

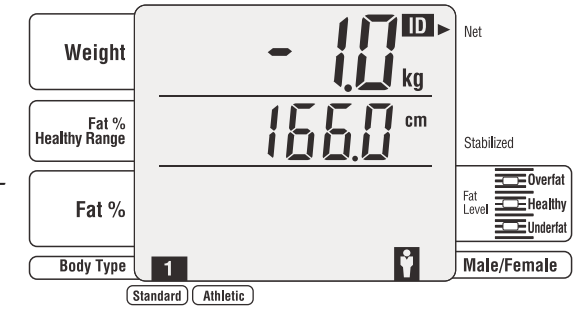

## 10 Press Enter / Next.

The "Step on" lamp flashes.

### Note

- When **CE** is pressed, it returns to the previous screen.

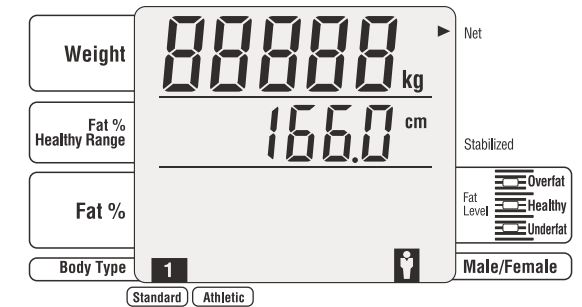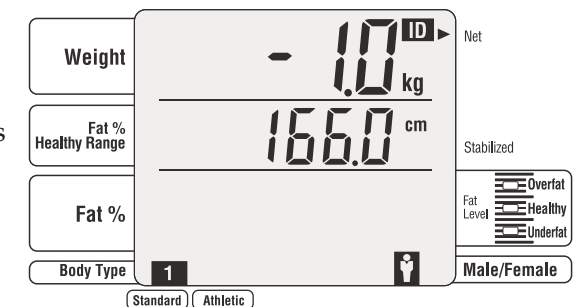

## 11 Step on the electrodes with bare feet.

Take off your socks and stockings before stepping on.

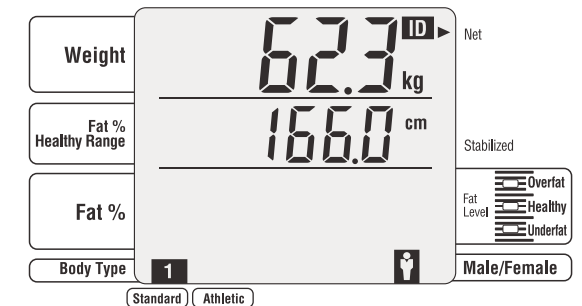

## 12 Under measurement of the body composition.

88888 display goes off sequentially.

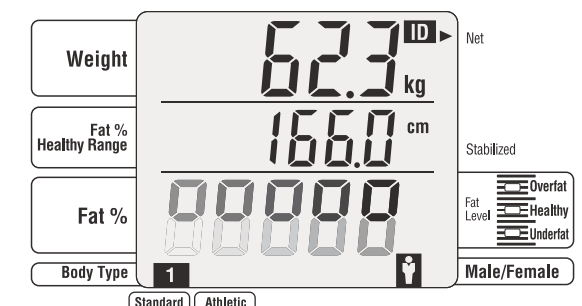

## 13 Measurement completion

The measurement result and the body fat percentage evaluation are displayed. It is automatically printed out. (In the case that other than 0 is set in the "Setting the number of sheets to print" (page 15).

### Note

- Fat % Healthy range is not displayed if OFF is set in the "setting ON or OFF of the Fat % Healthy range display" (page 17).

Step off the platform.

It returns to the "ID input" screen.

### Note

- The "body type selection" screen is displayed in the case that OFF is set in the "setting with or without an ID" (page 17).

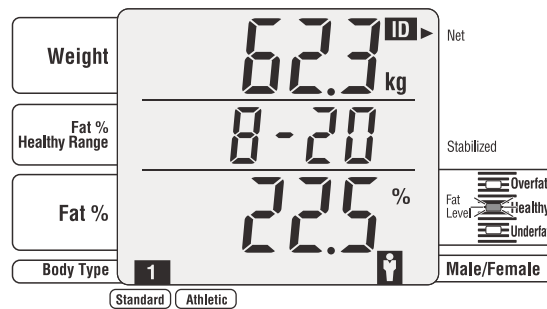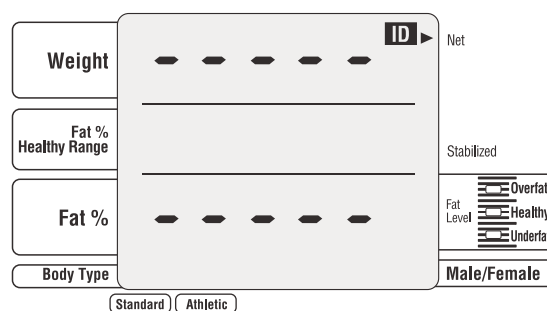

**How to read the display <kg mode>**

Judgment result based on the body fat percentage. (page 42.)

**How to read the display <lb mode>**

Judgment result based on the body fat percentage. (page 42.)

## In the case of the "Option mode" (not the one step mode)

In the option mode, after measuring weight, personal data is input and then body composition is measured.

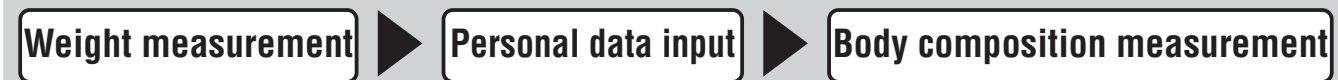

## 1 Press ON/OFF to turn on the power.

### Note

- Unit is changed by kg / lb key.

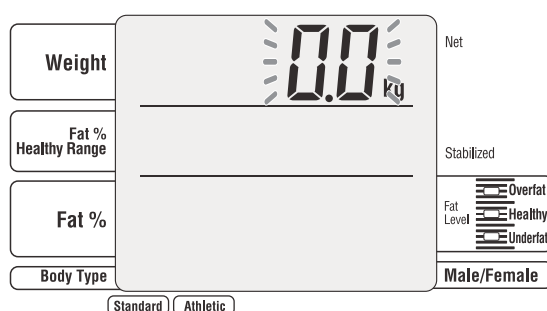

(kg mode)

## 2 Check that the body composition is selected and input weight of clothing.

Input it by pressing 0 - 9 and . .

### Note

- The clothes weight (preset tare) can be input in the range of 0.0-20.0lb or 0.0-10.0kg.  
\*0.2lb / 0.1kg increments
- To correct the input value,  
⇨press CE (the input is deleted).

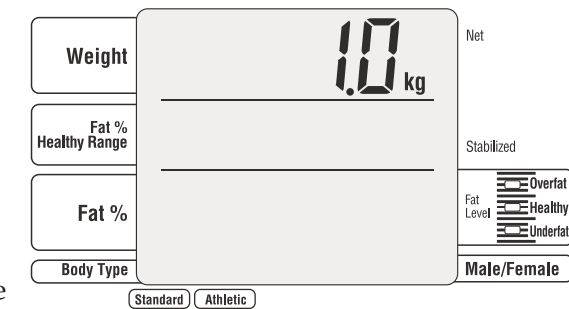

## 3 Press Enter / Next .

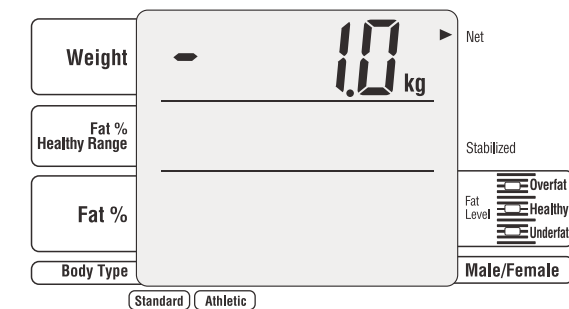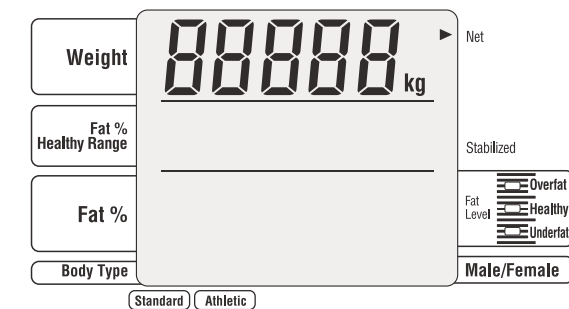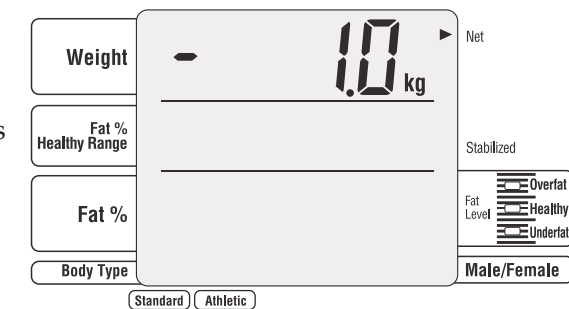

The "Step on" lamp flashes.

### Note

- When CE is pressed, it returns to the previous screen.



## 4 Step on the electrodes with bare feet.

Take off your socks and stockings before stepping on.

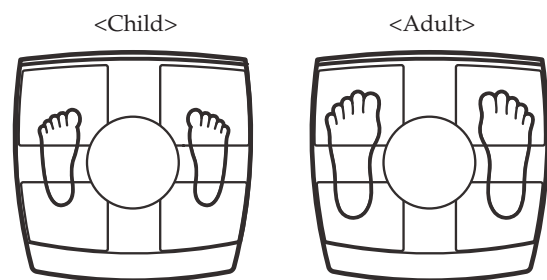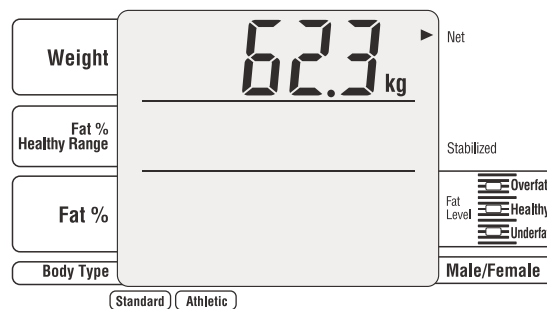

When the weight becomes stable, it changes to the screen at the right.

### Note

- Do not step off the platform.
- This screen is not displayed if OFF is set in the "setting with or without an ID" (page 17). (The "body type selection" screen is displayed.)

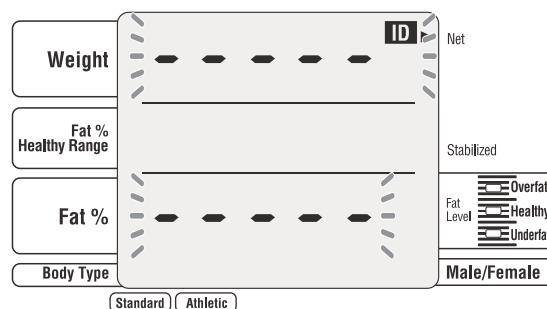

## 5 Input ID number.

Input it by pressing 0 - 9.

### Note

- This screen is not displayed if OFF is set in the "setting with or without an ID" (page 17).
- The ID number can be input from 0 - 999999999. If **Enter / Next** is pressed, the non-inputted digits are filled with 0s.
- If it is mistakenly input, press **CE** (the input is deleted).
- If **CE** is pressed in the state that an ID number is not input, it returns to the "measurement start" screen.

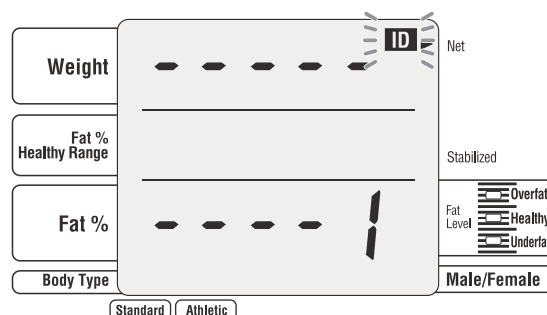

## 6 Press **Enter / Next**.

### Note

- This screen is not displayed if OFF is set in the "setting with or without an ID" (page 17).

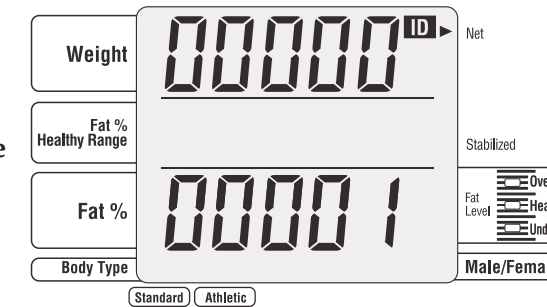

## 7 Select body type.

Press the body type selection keys to input. When the body type is selected, the lamp flashes on the "Gender".

### Note

- This screen is not displayed if OFF is set in the "setting ON or OFF of the athletic mode selection" (page 18).
- The body type can also be selected with the numeric keys (1 2).
- If it is mistakenly input, press **CE** (the input is deleted, and it returns to the "body type selection" screen).
- If **CE** is pressed in the state that the body type is not input, it returns to the "ID number input" screen (or "measurement start" screen).

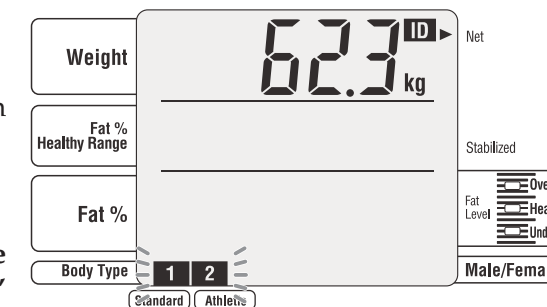

## 8 Select gender.

Press the male / female selection keys to input. When male or female is selected, the lamp flashes on the "Age".

### Note

- If it is mistakenly input, press **CE** (the input is deleted, and it returns to the "gender selection" screen).
- If **CE** is pressed in the state that the male or female is not selected, it returns to the "body type selection" screen.

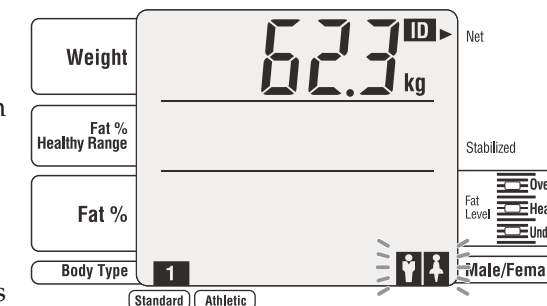

## 9 Input age.

Input it by pressing 0 - 9.

### Note

- The age can be input from 5 - 99.
- If it is mistakenly input, press **CE** (the input is deleted).
- If **CE** is pressed in the state that the age is not input, it returns to the "gender selection" screen.

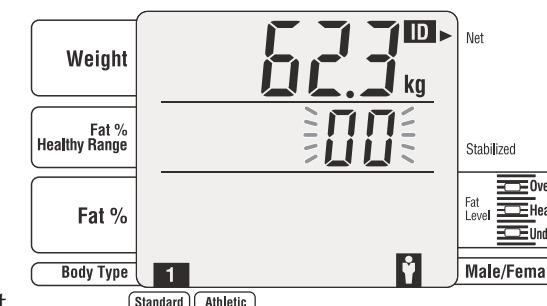



## 10 Press **Enter / Next**.

When the age is input, the lamp flashes on the "Height".

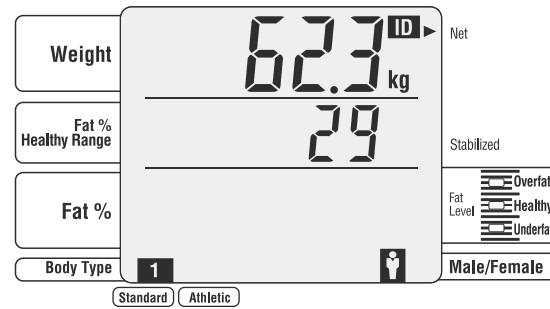

## 11 Input height.

Input it by pressing **0** - **9**.

### Note

- The height can be input from 3ft -7ft11.5in / 90.0-249.9cm.
- \*Unit is changed by **kg / lb** key.
- If it is mistakenly input, press **CE** (the input is deleted).
- If **CE** is pressed in the state that the height is not input, it returns to the "age input" screen.

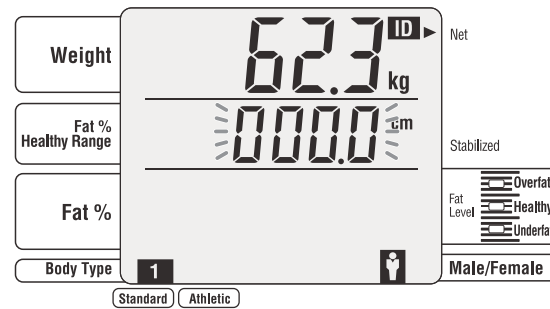

## 12 Press **Enter / Next**.

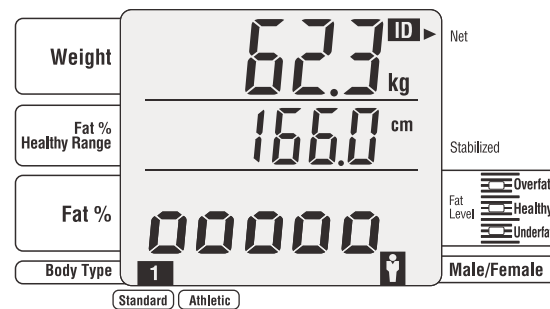

## 13 Under measurement of the body composition.

**88888** display goes off sequentially.

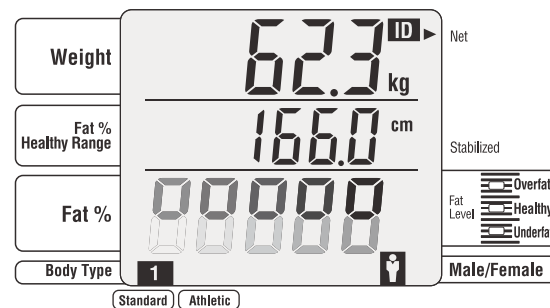

## 14 Measurement completion

The measurement result and the body fat percentage evaluation are displayed.

It is automatically printed out. (In the case that other than 0 is set in the "Setting the number of sheets to print" (page 15).

### Note

- Fat % Healthy range is not displayed if OFF is set in the "setting ON or OFF of the Fat % Healthy range display" (page 17).

Step off the platform.

It returns to the "measurement start" screen.

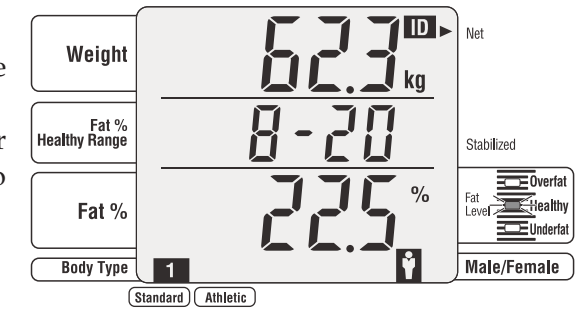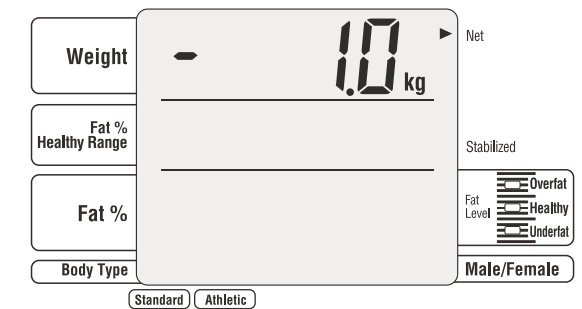

**How to read the display <kg mode>**

Judgment result based on the body fat percentage. (page 42.)

**How to read the display <lb mode>**

Judgment result based on the body fat percentage. (page 42.)

### 1 Input the target body fat %.

Input it by pressing **0** - **9**.

#### Note

- This screen is displayed if ON is set in the "setting ON or OFF of the target body fat %" (page 21).
- The target body fat % can be input from 4-55.
- If it is mistakenly input, press **CE** (the input is deleted).

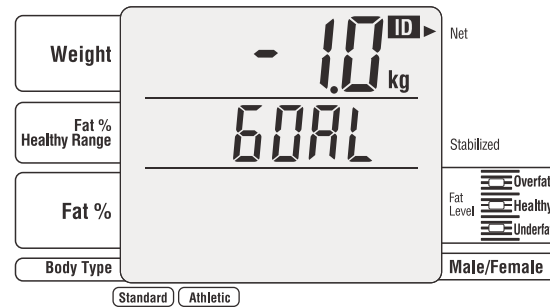

If the number of sheet to print is set to "0", target body fat % setting function will be OFF, automatically.

If the target body fat is set to 0 or nothing, the target body fat % will not print.

**Caution** Before you start a body weight management program and set the appropriate personal body fat %, please consult your doctor. Tanita is not responsible for setting the appropriate target body fat % for specific individuals.

### 1 Press **ON/OFF** to turn on the power.

#### Note

- There is no automatic weight lock function.

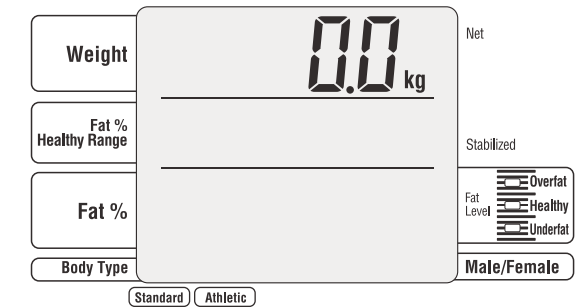

### 2 Check that the body weight is selected and input the clothes weight.

Input it by pressing **0** - **9** and **.**

#### Note

- The clothes weight (preset tare) can be input in the range of 0.0-20.0lb or 0.0-10.0kg.  
\*0.2lb / 0.1kg increments
- \*Unit is changed by **kg / lb** key.
- If it is mistakenly input, press **CE** (the input is deleted).

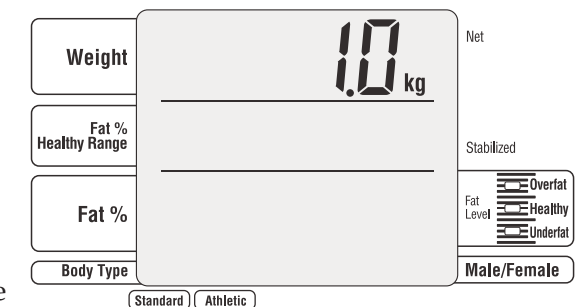

### 3 Press **Enter / Next**.

#### Note

- This screen is not displayed if OFF is set in the "setting with or without an ID" (page 17). (The "measurement start" screen is displayed.)

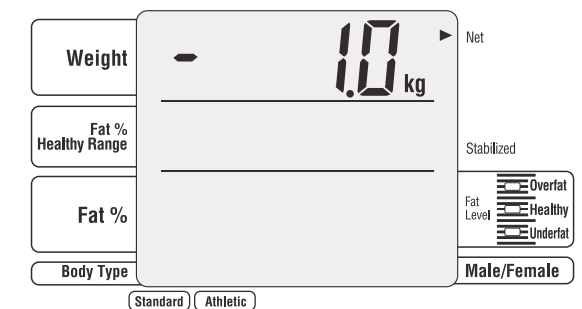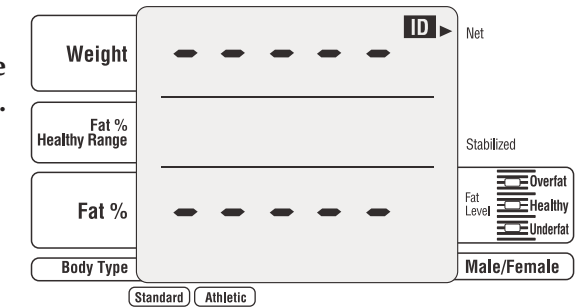

## 4 Input an ID number.

Input it by pressing **0** - **9**.

### Note

- This screen is not displayed in the case that OFF is set in the "setting with or without an ID" (page 17).
- The ID number can be input from 0 - 9999999999.
- If it is mistakenly input, press **CE** (the input is deleted).
- If **CE** is pressed in the state that an ID number is not input, it returns to the "measurement start."

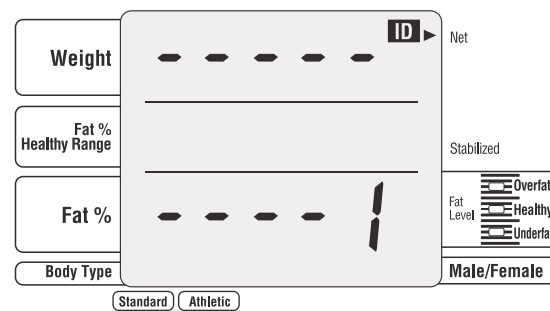

## 5 Press **Enter / Next**.

### Note

- This screen is not displayed in the case that OFF is set in the "setting with or without an ID" (page 17).

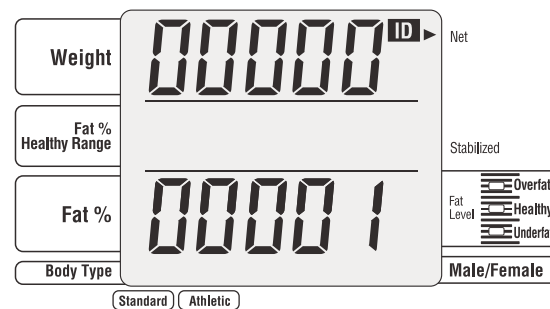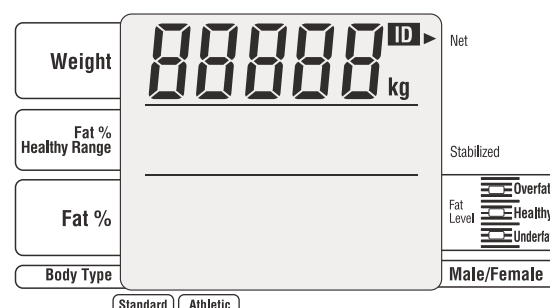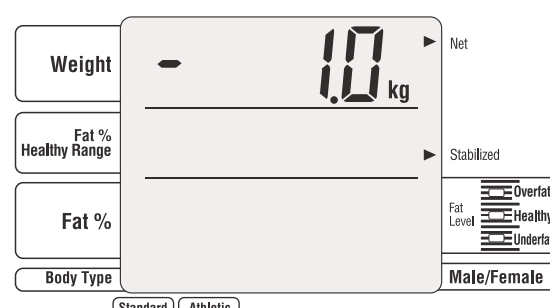

The lamp flashes for "Step on."

### Note

- If **CE** is pressed, it returns to the previous screen.

## 6 Measurement completion

It is automatically printed out. (In the case that other than 0 is set in the "Setting the number of sheets to print" (page 15).

Step off the platform.  
It returns to the "measurement start" screen.

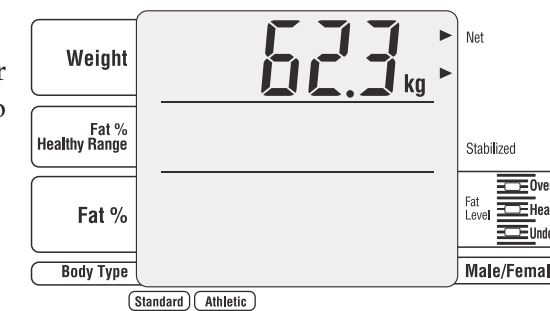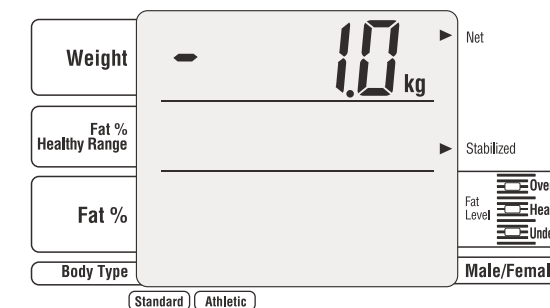

## - What is body fat percentage? (Applicable age 5 - 99)

Body fat percentage is the amount of body fat as a proportion of your body weight. Reducing excess levels of body fat has shown to reduce the risk of certain conditions such as high blood pressure, heart disease, diabetes and cancer. The chart below shows the healthy ranges for body fat.

Body Fat Ranges for Standard Children<sup>1</sup> <sup>1</sup>Susan Jebb et al. Obesity Research(02) 2004;12:A156-157  
 Body Fat Ranges for Standard Adults<sup>2</sup> <sup>2</sup>Gallagher D et al. Am J Clin Nutr 2000;72:694-701.  
<sup>1</sup>"New Body Fat Reference Curves for children"  
<sup>2</sup>"Healthy percentage body fat ranges: an approach for developing guidelines based on body mass index."

| Age   | Underfat |   |   |   | Healthy |   |   |   |   |    |    |    |    |    |    |    | Overfat |    |    |    | Obese |    |    |    |    |    |    |    |    |    |    |    |    |    |    |    |    |    |    |    |    |    |    |    |    |
|-------|----------|---|---|---|---------|---|---|---|---|----|----|----|----|----|----|----|---------|----|----|----|-------|----|----|----|----|----|----|----|----|----|----|----|----|----|----|----|----|----|----|----|----|----|----|----|----|
|       | 1        | 2 | 3 | 4 | 5       | 6 | 7 | 8 | 9 | 10 | 11 | 12 | 13 | 14 | 15 | 16 | 17      | 18 | 19 | 20 | 21    | 22 | 23 | 24 | 25 | 26 | 27 | 28 | 29 | 30 | 31 | 32 | 33 | 34 | 35 | 36 | 37 | 38 | 39 | 40 | 41 | 42 | 43 | 44 | 45 |
| 5     | 1        | 2 | 3 | 4 | 5       | 6 | 7 | 8 | 9 | 10 | 11 | 12 | 13 | 14 | 15 | 16 | 17      | 18 | 19 | 20 | 21    | 22 | 23 | 24 | 25 | 26 | 27 | 28 | 29 | 30 | 31 | 32 | 33 | 34 | 35 | 36 | 37 | 38 | 39 | 40 | 41 | 42 | 43 | 44 | 45 |
| 6     | 1        | 2 | 3 | 4 | 5       | 6 | 7 | 8 | 9 | 10 | 11 | 12 | 13 | 14 | 15 | 16 | 17      | 18 | 19 | 20 | 21    | 22 | 23 | 24 | 25 | 26 | 27 | 28 | 29 | 30 | 31 | 32 | 33 | 34 | 35 | 36 | 37 | 38 | 39 | 40 | 41 | 42 | 43 | 44 | 45 |
| 7     | 1        | 2 | 3 | 4 | 5       | 6 | 7 | 8 | 9 | 10 | 11 | 12 | 13 | 14 | 15 | 16 | 17      | 18 | 19 | 20 | 21    | 22 | 23 | 24 | 25 | 26 | 27 | 28 | 29 | 30 | 31 | 32 | 33 | 34 | 35 | 36 | 37 | 38 | 39 | 40 | 41 | 42 | 43 | 44 | 45 |
| 8     | 1        | 2 | 3 | 4 | 5       | 6 | 7 | 8 | 9 | 10 | 11 | 12 | 13 | 14 | 15 | 16 | 17      | 18 | 19 | 20 | 21    | 22 | 23 | 24 | 25 | 26 | 27 | 28 | 29 | 30 | 31 | 32 | 33 | 34 | 35 | 36 | 37 | 38 | 39 | 40 | 41 | 42 | 43 | 44 | 45 |
| 9     | 1        | 2 | 3 | 4 | 5       | 6 | 7 | 8 | 9 | 10 | 11 | 12 | 13 | 14 | 15 | 16 | 17      | 18 | 19 | 20 | 21    | 22 | 23 | 24 | 25 | 26 | 27 | 28 | 29 | 30 | 31 | 32 | 33 | 34 | 35 | 36 | 37 | 38 | 39 | 40 | 41 | 42 | 43 | 44 | 45 |
| 10    | 1        | 2 | 3 | 4 | 5       | 6 | 7 | 8 | 9 | 10 | 11 | 12 | 13 | 14 | 15 | 16 | 17      | 18 | 19 | 20 | 21    | 22 | 23 | 24 | 25 | 26 | 27 | 28 | 29 | 30 | 31 | 32 | 33 | 34 | 35 | 36 | 37 | 38 | 39 | 40 | 41 | 42 | 43 | 44 | 45 |
| 11    | 1        | 2 | 3 | 4 | 5       | 6 | 7 | 8 | 9 | 10 | 11 | 12 | 13 | 14 | 15 | 16 | 17      | 18 | 19 | 20 | 21    | 22 | 23 | 24 | 25 | 26 | 27 | 28 | 29 | 30 | 31 | 32 | 33 | 34 | 35 | 36 | 37 | 38 | 39 | 40 | 41 | 42 | 43 | 44 | 45 |
| 12    | 1        | 2 | 3 | 4 | 5       | 6 | 7 | 8 | 9 | 10 | 11 | 12 | 13 | 14 | 15 | 16 | 17      | 18 | 19 | 20 | 21    | 22 | 23 | 24 | 25 | 26 | 27 | 28 | 29 | 30 | 31 | 32 | 33 | 34 | 35 | 36 | 37 | 38 | 39 | 40 | 41 | 42 | 43 | 44 | 45 |
| 13    | 1        | 2 | 3 | 4 | 5       | 6 | 7 | 8 | 9 | 10 | 11 | 12 | 13 | 14 | 15 | 16 | 17      | 18 | 19 | 20 | 21    | 22 | 23 | 24 | 25 | 26 | 27 | 28 | 29 | 30 | 31 | 32 | 33 | 34 | 35 | 36 | 37 | 38 | 39 | 40 | 41 | 42 | 43 | 44 | 45 |
| 14    | 1        | 2 | 3 | 4 | 5       | 6 | 7 | 8 | 9 | 10 | 11 | 12 | 13 | 14 | 15 | 16 | 17      | 18 | 19 | 20 | 21    | 22 | 23 | 24 | 25 | 26 | 27 | 28 | 29 | 30 | 31 | 32 | 33 | 34 | 35 | 36 | 37 | 38 | 39 | 40 | 41 | 42 | 43 | 44 | 45 |
| 15    | 1        | 2 | 3 | 4 | 5       | 6 | 7 | 8 | 9 | 10 | 11 | 12 | 13 | 14 | 15 | 16 | 17      | 18 | 19 | 20 | 21    | 22 | 23 | 24 | 25 | 26 | 27 | 28 | 29 | 30 | 31 | 32 | 33 | 34 | 35 | 36 | 37 | 38 | 39 | 40 | 41 | 42 | 43 | 44 | 45 |
| 16    | 1        | 2 | 3 | 4 | 5       | 6 | 7 | 8 | 9 | 10 | 11 | 12 | 13 | 14 | 15 | 16 | 17      | 18 | 19 | 20 | 21    | 22 | 23 | 24 | 25 | 26 | 27 | 28 | 29 | 30 | 31 | 32 | 33 | 34 | 35 | 36 | 37 | 38 | 39 | 40 | 41 | 42 | 43 | 44 | 45 |
| 17    | 1        | 2 | 3 | 4 | 5       | 6 | 7 | 8 | 9 | 10 | 11 | 12 | 13 | 14 | 15 | 16 | 17      | 18 | 19 | 20 | 21    | 22 | 23 | 24 | 25 | 26 | 27 | 28 | 29 | 30 | 31 | 32 | 33 | 34 | 35 | 36 | 37 | 38 | 39 | 40 | 41 | 42 | 43 | 44 | 45 |
| 18    | 1        | 2 | 3 | 4 | 5       | 6 | 7 | 8 | 9 | 10 | 11 | 12 | 13 | 14 | 15 | 16 | 17      | 18 | 19 | 20 | 21    | 22 | 23 | 24 | 25 | 26 | 27 | 28 | 29 | 30 | 31 | 32 | 33 | 34 | 35 | 36 | 37 | 38 | 39 | 40 | 41 | 42 | 43 | 44 | 45 |
| 19    | 1        | 2 | 3 | 4 | 5       | 6 | 7 | 8 | 9 | 10 | 11 | 12 | 13 | 14 | 15 | 16 | 17      | 18 | 19 | 20 | 21    | 22 | 23 | 24 | 25 | 26 | 27 | 28 | 29 | 30 | 31 | 32 | 33 | 34 | 35 | 36 | 37 | 38 | 39 | 40 | 41 | 42 | 43 | 44 | 45 |
| 20-39 | 1        | 2 | 3 | 4 | 5       | 6 | 7 | 8 | 9 | 10 | 11 | 12 | 13 | 14 | 15 | 16 | 17      | 18 | 19 | 20 | 21    | 22 | 23 | 24 | 25 | 26 | 27 | 28 | 29 | 30 | 31 | 32 | 33 | 34 | 35 | 36 | 37 | 38 | 39 | 40 | 41 | 42 | 43 | 44 | 45 |
| 40-59 | 1        | 2 | 3 | 4 | 5       | 6 | 7 | 8 | 9 | 10 | 11 | 12 | 13 | 14 | 15 | 16 | 17      | 18 | 19 | 20 | 21    | 22 | 23 | 24 | 25 | 26 | 27 | 28 | 29 | 30 | 31 | 32 | 33 | 34 | 35 | 36 | 37 | 38 | 39 | 40 | 41 | 42 | 43 | 44 | 45 |
| 60-   | 1        | 2 | 3 | 4 | 5       | 6 | 7 | 8 | 9 | 10 | 11 | 12 | 13 | 14 | 15 | 16 | 17      | 18 | 19 | 20 | 21    | 22 | 23 | 24 | 25 | 26 | 27 | 28 | 29 | 30 | 31 | 32 | 33 | 34 | 35 | 36 | 37 | 38 | 39 | 40 | 41 | 42 | 43 | 44 | 45 |

| Age   | 0% |   |   |   | 10% |   |   |   |   |    |    |    |    |    |    |    | 20% |    |                                                                                                                                                                                                                                                                                                               |    | 30% |    |    |    | 40% |    |    |    |                                                                                                                                                                                                |    |    |    |    |    |    |    |    |    |                                                                             |    |    |    |    |    |    |
|-------|----|---|---|---|-----|---|---|---|---|----|----|----|----|----|----|----|-----|----|---------------------------------------------------------------------------------------------------------------------------------------------------------------------------------------------------------------------------------------------------------------------------------------------------------------|----|-----|----|----|----|-----|----|----|----|------------------------------------------------------------------------------------------------------------------------------------------------------------------------------------------------|----|----|----|----|----|----|----|----|----|-----------------------------------------------------------------------------|----|----|----|----|----|----|
|       | 1  | 2 | 3 | 4 | 5   | 6 | 7 | 8 | 9 | 10 | 11 | 12 | 13 | 14 | 15 | 16 | 17  | 18 | 19 <th>20</th> <th>21</th> <th>22</th> <th>23</th> <th>24</th> <th>25</th> <th>26</th> <th>27</th> <th>28</th> <th>29 <th>30</th><th>31</th><th>32</th><th>33</th><th>34</th><th>35</th><th>36</th><th>37</th><th>38</th><th>39 <th>40</th><th>41</th><th>42</th><th>43</th><th>44</th><th>45 </th></th></th> | 20 | 21  | 22 | 23 | 24 | 25  | 26 | 27 | 28 | 29 <th>30</th> <th>31</th> <th>32</th> <th>33</th> <th>34</th> <th>35</th> <th>36</th> <th>37</th> <th>38</th> <th>39 <th>40</th><th>41</th><th>42</th><th>43</th><th>44</th><th>45 </th></th> | 30 | 31 | 32 | 33 | 34 | 35 | 36 | 37 | 38 | 39 <th>40</th> <th>41</th> <th>42</th> <th>43</th> <th>44</th> <th>45 </th> | 40 | 41 | 42 | 43 | 44 | 45 |
| 5     | 1  | 2 | 3 | 4 | 5   | 6 | 7 | 8 | 9 | 10 | 11 | 12 | 13 | 14 | 15 | 16 | 17  | 18 | 19                                                                                                                                                                                                                                                                                                            | 20 | 21  | 22 | 23 | 24 | 25  | 26 | 27 | 28 | 29                                                                                                                                                                                             | 30 | 31 | 32 | 33 | 34 | 35 | 36 | 37 | 38 | 39                                                                          | 40 | 41 | 42 | 43 | 44 | 45 |
| 6     | 1  | 2 | 3 | 4 | 5   | 6 | 7 | 8 | 9 | 10 | 11 | 12 | 13 | 14 | 15 | 16 | 17  | 18 | 19                                                                                                                                                                                                                                                                                                            | 20 | 21  | 22 | 23 | 24 | 25  | 26 | 27 | 28 | 29                                                                                                                                                                                             | 30 | 31 | 32 | 33 | 34 | 35 | 36 | 37 | 38 | 39                                                                          | 40 | 41 | 42 | 43 | 44 | 45 |
| 7     | 1  | 2 | 3 | 4 | 5   | 6 | 7 | 8 | 9 | 10 | 11 | 12 | 13 | 14 | 15 | 16 | 17  | 18 | 19                                                                                                                                                                                                                                                                                                            | 20 | 21  | 22 | 23 | 24 | 25  | 26 | 27 | 28 | 29                                                                                                                                                                                             | 30 | 31 | 32 | 33 | 34 | 35 | 36 | 37 | 38 | 39                                                                          | 40 | 41 | 42 | 43 | 44 | 45 |
| 8     | 1  | 2 | 3 | 4 | 5   | 6 | 7 | 8 | 9 | 10 | 11 | 12 | 13 | 14 | 15 | 16 | 17  | 18 | 19                                                                                                                                                                                                                                                                                                            | 20 | 21  | 22 | 23 | 24 | 25  | 26 | 27 | 28 | 29                                                                                                                                                                                             | 30 | 31 | 32 | 33 | 34 | 35 | 36 | 37 | 38 | 39                                                                          | 40 | 41 | 42 | 43 | 44 | 45 |
| 9     | 1  | 2 | 3 | 4 | 5   | 6 | 7 | 8 | 9 | 10 | 11 | 12 | 13 | 14 | 15 | 16 | 17  | 18 | 19                                                                                                                                                                                                                                                                                                            | 20 | 21  | 22 | 23 | 24 | 25  | 26 | 27 | 28 | 29                                                                                                                                                                                             | 30 | 31 | 32 | 33 | 34 | 35 | 36 | 37 | 38 | 39                                                                          | 40 | 41 | 42 | 43 | 44 | 45 |
| 10    | 1  | 2 | 3 | 4 | 5   | 6 | 7 | 8 | 9 | 10 | 11 | 12 | 13 | 14 | 15 | 16 | 17  | 18 | 19                                                                                                                                                                                                                                                                                                            | 20 | 21  | 22 | 23 | 24 | 25  | 26 | 27 | 28 | 29                                                                                                                                                                                             | 30 | 31 | 32 | 33 | 34 | 35 | 36 | 37 | 38 | 39                                                                          | 40 | 41 | 42 | 43 | 44 | 45 |
| 11    | 1  | 2 | 3 | 4 | 5   | 6 | 7 | 8 | 9 | 10 | 11 | 12 | 13 | 14 | 15 | 16 | 17  | 18 | 19                                                                                                                                                                                                                                                                                                            | 20 | 21  | 22 | 23 | 24 | 25  | 26 | 27 | 28 | 29                                                                                                                                                                                             | 30 | 31 | 32 | 33 | 34 | 35 | 36 | 37 | 38 | 39                                                                          | 40 | 41 | 42 | 43 | 44 | 45 |
| 12    | 1  | 2 | 3 | 4 | 5   | 6 | 7 | 8 | 9 | 10 | 11 | 12 | 13 | 14 | 15 | 16 | 17  | 18 | 19                                                                                                                                                                                                                                                                                                            | 20 | 21  | 22 | 23 | 24 | 25  | 26 | 27 | 28 | 29                                                                                                                                                                                             | 30 | 31 | 32 | 33 | 34 | 35 | 36 | 37 | 38 | 39                                                                          | 40 | 41 | 42 | 43 | 44 | 45 |
| 13    | 1  | 2 | 3 | 4 | 5   | 6 | 7 | 8 | 9 | 10 | 11 | 12 | 13 | 14 | 15 | 16 | 17  | 18 | 19                                                                                                                                                                                                                                                                                                            | 20 | 21  | 22 | 23 | 24 | 25  | 26 | 27 | 28 | 29                                                                                                                                                                                             | 30 | 31 | 32 | 33 | 34 | 35 | 36 | 37 | 38 | 39                                                                          | 40 | 41 | 42 | 43 | 44 | 45 |
| 14    | 1  | 2 | 3 | 4 | 5   | 6 | 7 | 8 | 9 | 10 | 11 | 12 | 13 | 14 | 15 | 16 | 17  | 18 | 19                                                                                                                                                                                                                                                                                                            | 20 | 21  | 22 | 23 | 24 | 25  | 26 | 27 | 28 | 29                                                                                                                                                                                             | 30 | 31 | 32 | 33 | 34 | 35 | 36 | 37 | 38 | 39                                                                          | 40 | 41 | 42 | 43 | 44 | 45 |
| 15    | 1  | 2 | 3 | 4 | 5   | 6 | 7 | 8 | 9 | 10 | 11 | 12 | 13 | 14 | 15 | 16 | 17  | 18 | 19                                                                                                                                                                                                                                                                                                            | 20 | 21  | 22 | 23 | 24 | 25  | 26 | 27 | 28 | 29                                                                                                                                                                                             | 30 | 31 | 32 | 33 | 34 | 35 | 36 | 37 | 38 | 39                                                                          | 40 | 41 | 42 | 43 | 44 | 45 |
| 16    | 1  | 2 | 3 | 4 | 5   | 6 | 7 | 8 | 9 | 10 | 11 | 12 | 13 | 14 | 15 | 16 | 17  | 18 | 19                                                                                                                                                                                                                                                                                                            | 20 | 21  | 22 | 23 | 24 | 25  | 26 | 27 | 28 | 29                                                                                                                                                                                             | 30 | 31 | 32 | 33 | 34 | 35 | 36 | 37 | 38 | 39                                                                          | 40 | 41 | 42 | 43 | 44 | 45 |
| 17    | 1  | 2 | 3 | 4 | 5   | 6 | 7 | 8 | 9 | 10 | 11 | 12 | 13 | 14 | 15 | 16 | 17  | 18 | 19                                                                                                                                                                                                                                                                                                            | 20 | 21  | 22 | 23 | 24 | 25  | 26 | 27 | 28 | 29                                                                                                                                                                                             | 30 | 31 | 32 | 33 | 34 | 35 | 36 | 37 | 38 | 39                                                                          | 40 | 41 | 42 | 43 | 44 | 45 |
| 18    | 1  | 2 | 3 | 4 | 5   | 6 | 7 | 8 | 9 | 10 | 11 | 12 | 13 | 14 | 15 | 16 | 17  | 18 | 19                                                                                                                                                                                                                                                                                                            | 20 | 21  | 22 | 23 | 24 | 25  | 26 | 27 | 28 | 29                                                                                                                                                                                             | 30 | 31 | 32 | 33 | 34 | 35 | 36 | 37 | 38 | 39                                                                          | 40 | 41 | 42 | 43 | 44 | 45 |
| 19    | 1  | 2 | 3 | 4 | 5   | 6 | 7 | 8 | 9 | 10 | 11 | 12 | 13 | 14 | 15 | 16 | 17  | 18 | 19                                                                                                                                                                                                                                                                                                            | 20 | 21  | 22 | 23 | 24 | 25  | 26 | 27 | 28 | 29                                                                                                                                                                                             | 30 | 31 | 32 | 33 | 34 | 35 | 36 | 37 | 38 | 39                                                                          | 40 | 41 | 42 | 43 | 44 | 45 |
| 20-39 | 1  | 2 | 3 | 4 | 5   | 6 | 7 | 8 | 9 | 10 | 11 | 12 | 13 | 14 | 15 | 16 | 17  | 18 | 19                                                                                                                                                                                                                                                                                                            | 20 | 21  | 22 | 23 | 24 | 25  | 26 | 27 | 28 | 29                                                                                                                                                                                             | 30 | 31 | 32 | 33 | 34 | 35 | 36 | 37 | 38 | 39</                                                                        |    |    |    |    |    |    |



### - What is basal metabolic rate (BMR)? (Applicable age 18 - 99)

#### WHAT IS BMR?

Your Basal Metabolic Rate(BMR) is the minimum level of energy your body needs when at rest to function effectively including your respiratory and circulatory organs, neural system, liver, kidneys, and other organs. You burn calories when sleeping.

About 70% of calories consumed every day are used for your basal metabolism. In addition, energy is used when doing any kind of activity however; the more vigorous the activity is the more calories are burned. This is because skeletal muscle (which accounts for approximately 40% of your body weight) acts as your metabolic engine and uses a large amount of energy. Your basal metabolism is greatly affected by the quantity of muscles you have, therefor increasing your muscle mass will help increase your basal metabolism.

By studying healthy individuals, scientists have found that as people age, their metabolic rate changes. Basal metabolism rises as a child matures. After a peak at the age of 16 or 17, it typically starts to decrease gradually.

Having a higher basal metabolism will increase the number of calories used and help to decrease the amount of body fat. A low basal metabolic rate will make it harder to lose body fat and overall weight.

#### HOW DOES A TANITA BODY COMPOSITION ANALYZER CALCULATE BMR?

The basic way of calculating Basal Metabolic Rate BMR is a standard equation using weight and age. Tanita has conducted in-depth research into the relationship of BMR and body composition giving a much more accurate and personalized reading for the user based on the impedance measurement. This method has been medically validated using indirect calorimetry (measuring the breath composition).\*

\* Reliability on equation for Basal Metabolic Rate: At 2002 Nutrition Week : A Scientific and Clinical Forum and Exposition Title: International Comparison: Resting Energy Expenditure Prediction Models: The American Journal of Clinical Nutrition

### - What is metabolic age? (Applicable age 18 - 99)

This feature calculates your BMR and indicates the average age associated with that type of metabolism.

If your BMR Age is higher than your actual age, it is an indication that you need to improve your metabolic rate. Increased exercise will build healthy muscle tissue, which will improve your metabolic age.

You will obtain a reading between 12 and 90. Under 12 will be displayed as "12" and over 90 displayed as "90".

### - What is muscle mass? (Applicable age 18 - 99)

This feature indicates the weight of muscle in your body. the muscle mass displayed includes the skeletal muscles, smooth muscles (such as cardiac and digestive muscles) and the water contained in these muscles.

Muscles play an important role as they act as an engine in consuming energy. As your muscle mass increase, your energy consumption increases helping you reduce excess body fat levels and lose weight in a healthy way.

#### What is physique rating?

This feature assesses your physique according to the ratio of body fat ad muscle mass in your body. As you become more active and reduce the amount of body fat, your physique rating will also change accordingly. Even though your weight may not change, your muscle mass and body fat levels may be changing making you healthier and at lower risk of certain diseases.

Each person should set their own goal of which physique they would like and follow a diet and fitness program to meet that goal.

| Result | Physique Rating   | Explanation                                                                                                                                  |
|--------|-------------------|----------------------------------------------------------------------------------------------------------------------------------------------|
| 1      | Hidden obese      | <b>Small Frame Obese</b>                                                                                                                     |
|        |                   | This person seems to have a healthy body type based on physical appearance; however, they have a high body fat % with low muscle mass level. |
| 2      | Obese             | <b>Medium Frame Obese</b>                                                                                                                    |
|        |                   | This person has a high body fat percentage, with a moderate muscle mass level.                                                               |
| 3      | Solidly-built     | <b>Large Frame Obese</b>                                                                                                                     |
|        |                   | This person has both a high body fat % and a high muscle mass.                                                                               |
| 4      | Under exercised   | <b>Low Muscle &amp; Average Body Fat%</b>                                                                                                    |
|        |                   | This person has an average body fat % and a less than average muscle mass level                                                              |
| 5      | Standard          | <b>Ave. Muscle &amp; Ave. Body Fat %</b>                                                                                                     |
|        |                   | This person has average levels of both body fat and muscle mass.                                                                             |
| 6      | Standard Muscular | <b>High Muscle &amp; Ave. Body Fat % (Athlete)</b>                                                                                           |
|        |                   | This person has an average body fat % and higher than normal muscle mass level.                                                              |
| 7      | Thin              | <b>Low Muscle &amp; Low Fat</b>                                                                                                              |
|        |                   | This person has both a lower than normal body fat % and muscle mass level.                                                                   |
| 8      | Thin and muscular | <b>Thin and muscular (Athlete)</b>                                                                                                           |
|        |                   | This person has lower than normal body fat % while having adequate muscle mass.                                                              |
| 9      | Very Muscular     | <b>Very Muscular (Athlete)</b>                                                                                                               |
|        |                   | This person has lower than normal body fat % while having above average muscle mass.                                                         |

Source : Data from Columbia University (New York) & Tanita Institute (Tokyo)

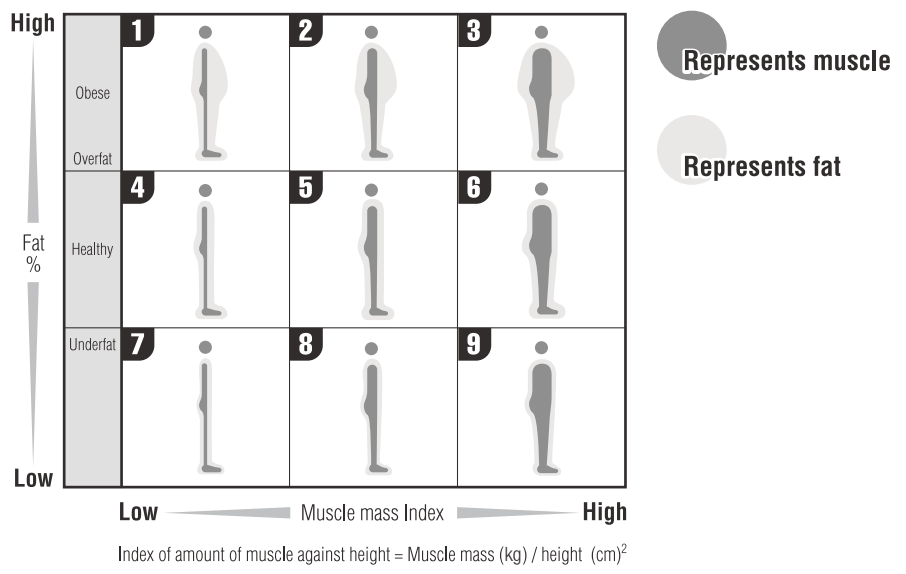



## - What is bone mass? (Applicable age 18 - 99)

This feature indicates the amount of bone (bone mineral level, calcium or other minerals) in the body. Research has shown that exercise and the development of muscle tissue are related to stronger, healthier bones. While bone structure is unlikely to make noticeable changes in a short period, it is important that you develop and maintain healthy bones by having a balanced diet and plenty of exercise. People worried about bone disease should consult their physician. People who suffer from osteoporosis or low bone densities due to advanced age, young age, pregnancy, hormonal treatment or other causes, may not get accurate estimations of their bone mass.

Below is the result of estimated bone masses of persons aged 20 to 40, who are said to have the largest amounts of bone masses, by weight. (Source : Tanita Body Weight Science Institute)

Please use the below charts as a guide to compare your bone mass reading.

### Women : Average of estimated bone mass

| Weight (lb)      |                |               | Weight (kg)     |               |              |
|------------------|----------------|---------------|-----------------|---------------|--------------|
| Less than 110 lb | 110lb - 165 lb | 165 lb and up | Less than 50 kg | 50 kg - 75 kg | 75 kg and up |
| 4.3 lb           | 5.3 lb         | 6.5 lb        | 1,95 kg         | 2,40 kg       | 2,95 kg      |

### Men : Average of estimated bone mass

| Weight (lb)      |                 |               | Weight (kg)     |               |              |
|------------------|-----------------|---------------|-----------------|---------------|--------------|
| Less than 143 lb | 143 lb - 209 lb | 209 lb and up | Less than 65 kg | 65 kg - 95 kg | 95 kg and up |
| 5.9 lb           | 7.3 lb          | 8.1 lb        | 2,66 kg         | 3,29 kg       | 3,69 kg      |

**Note:** Persons described below may obtain varying readings and should take the values given for reference purposes only.

- Elderly persons - Women during or after menopause
- People receiving hormone therapy

"Estimated bone mass" is a value estimated statistically based on its correlation with the fat-free amount (tissues other than the fat). "Estimated bone mass" does not give a direct judgment on the hardness or strength of the bones or the risks of bone fractures. If you have concerns over your bones, you are recommended to consult a specialist physician.

# Troubleshooting

Eng

- Please check the following before asking for repair.

When necessary  
(Troubleshooting)

|                | Symptom                                                                                                                 | Please check                                                                                                                                                                                                                                                                                    |
|----------------|-------------------------------------------------------------------------------------------------------------------------|-------------------------------------------------------------------------------------------------------------------------------------------------------------------------------------------------------------------------------------------------------------------------------------------------|
| How to measure | <b>Impedance measurement error</b><br>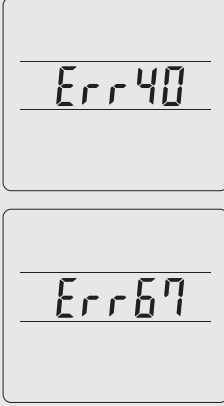 | <ul style="list-style-type: none"> <li>• Measure with bare feet.</li> <li>• When the soles of your feet are dry, drop water for about 0.5 ml with the attached dropper on the electrodes before measurement.</li> <li>• Check the input information.</li> </ul>                                 |
|                | <b>Zero point error</b><br>           | <ul style="list-style-type: none"> <li>• Turn off the power, and remove the items on the platform and turn on the power again, and then redo the measurement.</li> </ul>                                                                                                                        |
|                | <b>The measured weight is not stable.</b>                                                                               | <ul style="list-style-type: none"> <li>• Is it installed at a place with vibrations?</li> <li>• Is the platform inclined?<br/>⇒ Keep the platform horizontal. (☞ pages 8 and 9)</li> <li>• Is anything caught in the gaps of the platform?<br/>⇒ Remove anything caught in the gaps.</li> </ul> |
| Display part   | <b>Nothing is displayed even after turning on the power.</b>                                                            | <ul style="list-style-type: none"> <li>• Check that the power supply is connected correctly.</li> </ul>                                                                                                                                                                                         |
|                |  is displayed.                       | <ul style="list-style-type: none"> <li>• The weight to measure exceeds the measurement range.</li> </ul>                                                                                                                                                                                        |

Eng

When necessary  
(Troubleshooting)

|         | Symptom                                                                                                                | Please check                                                                                                                                                                                                                                                                                                                      |
|---------|------------------------------------------------------------------------------------------------------------------------|-----------------------------------------------------------------------------------------------------------------------------------------------------------------------------------------------------------------------------------------------------------------------------------------------------------------------------------|
| Printer | <b>Run out of printer paper</b><br>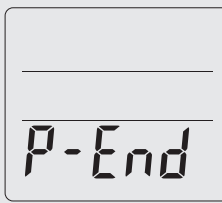 | <ul style="list-style-type: none"> <li>• Printer paper is not supplied.<br/>⇒ Supply paper.</li> <li>⇒ In the case that the printer is not used, press <b>CE</b> and redo the initial setting.</li> </ul>                                                                                                                         |
|         | <b>Printer cover open</b><br>       | <ul style="list-style-type: none"> <li>• The printer cover is open.<br/>⇒ Properly close it.</li> <li>⇒ Check that the printer paper is not slanted.</li> </ul>                                                                                                                                                                   |
|         | <b>Paper does not come out.</b>                                                                                        | <p><b>Check the settings.</b></p> <ul style="list-style-type: none"> <li>• Is 0 set for the number of sheets to print in the "determination of the number of sheets to print?"<br/>⇒ Press 1 - 3. (☞ page 15)</li> <li>• The printer may be broken.<br/>⇒ Contact the agent from which you have purchased the product.</li> </ul> |
|         | <b>The paper comes out, however, nothing has been printed.</b>                                                         | <ul style="list-style-type: none"> <li>• Is the reverse side of the printer paper set?<br/>⇒ Set the paper properly. (☞ page 11)</li> <li>• The printer may be broken.<br/>⇒ Contact the agent from which you have purchased the product.</li> </ul>                                                                              |

### Note

- In the case that an error is displayed other than the above, turn off the power once, and then measure again.  
If the same error is displayed repeatedly, contact our customer service center.

# Connection with a personal computer

 The USB interface enables input and output from this equipment.

## - Specifications

|                         |                           |
|-------------------------|---------------------------|
| Communication standards | USB                       |
| Communication method    | Asynchronous Transmission |
| Signal speed            | 9600 baud                 |
| Data bit length         | 8 bits                    |
| Parity                  | None                      |
| Stop bit                | 1 bit                     |
| Flow control            | None                      |
| Terminator              | CR+LF                     |

### Note

- USB connector (B - Type 4 - pin female) are located on the back of the control box.
- Please provide your own cable as necessary as none are included.  
USB cable : A - Type 4 - pin (male) - B - Type 4 - pin (male)
- You must install the necessary driver onto your PC, available download from <http://www.tanita.com>.

## - Transmit data

 **Caution** Transmission Data is output immediately after measurement regardless of the status of the receiving equipment (personal computer, etc.). Therefore the receiving equipment needs to be ready to accept the data before measuring.

### (1) Output example (in the case to kg unit)

#### Note

- The data are divided with commas (,) for each data.
- The terminator (end of the data) is CR (ASCII code 0DH), LF (ASCII code 0AH).
- The control data for the items 1 – 4 are for expansion. They are not used presently so the receiving side can ignore them.
- Because of its specifications, the scale will output an irrelevant signal approximately 0.1 second after data output. Make sure you ignore this signal and do not import it.

#### Entire body data

|                    |                   |                     |                   |                    |            |    |              |    |         |
|--------------------|-------------------|---------------------|-------------------|--------------------|------------|----|--------------|----|---------|
| Model number       | Serial number     | ID number           | Date (mm/dd/yyyy) | Time               |            |    |              |    |         |
| MO                 | "XXXXXX"          | SN                  | "XXXXXXXX"        | ID                 | "XXXXXXXX" | Dt | "mm/dd/yyyy" | TI | "hh:mm" |
| Body type          | Gender            | Age                 | Height            | Preset tare        |            |    |              |    |         |
| Bt                 | 0or2              | GE                  | 1or2              | AG                 | XX         | Hm | XXX.X        | Pt | XX.X    |
| Body weight        | Fat %             | Fat mass            | Fat free mass     | Muscle mass        |            |    |              |    |         |
| Wk                 | XXX.X             | FW                  | XX.X              | rW                 | XXX.X      | MW | XXX.X        | mW | XXX.X   |
| Muscle score       | Bone mass         | Body water          | Body water %      | BMI                |            |    |              |    |         |
| sW                 | XX                | bW                  | XXX.X             | wW                 | XXX.X      | ww | XX.X         | MI | XXX.X   |
| Ideal body weight  | Degree of obesity | Visceral fat rating | BMR (kJ)          | BMR (kcal)         |            |    |              |    |         |
| Sw                 | XXX.X             | OV                  | XXX.X             | IF                 | XX         | rb | XXXXX        | rB | XXXXX   |
| BMR score          | Metabolic age     | Target body fat %   | Predicted weight  | Predicted fat mass |            |    |              |    |         |
| rJ                 | XX                | rA                  | XX                | gF                 | XX         | gW | XXX.X        | gf | XXX.X   |
| Fat to gain / lose | Impedance (50kHz) | Checksum            |                   |                    |            |    |              |    |         |
| gt                 | XXXXX.X           | ZF                  | XXXX.X            | CS                 | XX         |    |              |    |         |

## (2) Output data items

## &lt;kg / cm mode&gt;

| Item                | Header | format           | kg / cm mode                                 | Order of output  |         |       |       |
|---------------------|--------|------------------|----------------------------------------------|------------------|---------|-------|-------|
|                     |        |                  |                                              | Body composition |         |       | Scale |
|                     |        |                  |                                              | Adult            | Athlete | Child |       |
| Control data        | {0     |                  | 2 bytes fixed length                         | 1                | 1       | 1     | 1     |
| Control data        | ~0     |                  | 1 byte fixed length                          | 2                | 2       | 2     | 2     |
| Control data        | ~1     |                  | 1 byte fixed length                          | 3                | 3       | 3     |       |
| Control data        | ~2     |                  | 1 byte fixed length                          | 4                | 4       | 4     |       |
| Model number        | MO     | "XXXXXX"         | 8 bytes fixed length ("SC-331")              | 5                | 5       | 5     | 3     |
| Serial number       | SN     | "XXXXXXXX"       | 10 bytes fixed length                        | 6                | 6       | 6     | 4     |
| ID number           | ID     | "XXXXXXXXXX"     | 12 bytes fixed length                        | 7                | 7       | 7     | 5     |
| Date                | Dt     | "mm / dd / yyyy" | 12 bytes fixed length ("mm / dd / yyyy")     | 8                | 8       | 8     | 6     |
| Time                | TI     | "hh : mm"        | 7 bytes fixed length                         | 9                | 9       | 9     | 7     |
| Body type           | Bt     | 0 or 2           | 1 byte fixed length (0:Standard 2:Athletic)  | 10               | 10      | 10    |       |
| Gender              | GE     | 1 or 2           | 1 byte fixed length (1:Male 2:Female)        | 11               | 11      | 11    |       |
| Age                 | AG     | XX               | 1-2 bytes variable length                    | 12               | 12      | 12    |       |
| Height              | Hm     | XXX.X            | 4-5 bytes variable length (cm)               | 13               | 13      | 13    |       |
| Preset tare         | Pt     | XX.X             | 3-4 bytes variable length (increments 0.1kg) | 14               | 14      | 14    | 8     |
| Body weight         | Wk     | XXX.X            | 3-5 bytes variable length (increments 0.1kg) | 15               | 15      | 15    | 9     |
| Fat %               | FW     | XX.X             | 3-4 bytes variable length (increments 0.1%)  | 16               | 16      | 16    |       |
| Fat mass            | fW     | XXX.X            | 3-5 bytes variable length (increments 0.1kg) | 17               | 17      | 17    |       |
| FFM                 | MW     | XXX.X            | 3-5 bytes variable length (increments 0.1kg) | 18               | 18      | 18    |       |
| Muscle mass         | mW     | XXX.X            | 3-5 bytes variable length (increments 0.1kg) | 19               | 19      |       |       |
| Muscle score        | sW     | XX               | 1-2 bytes variable length (1-24)             | 20               | 20      |       |       |
| Bone mass           | bW     | XXX.X            | 3-5 bytes variable length (increments 0.1kg) | 21               | 21      |       |       |
| Body water          | wW     | XXX.X            | 3-5 bytes variable length (increments 0.1kg) | 22               | 22      |       |       |
| Body water %        | ww     | XX.X             | 4 bytes fixed length (increments 0.1%)       | 23               | 23      |       |       |
| BMI                 | MI     | XXX.X            | 3-5 bytes variable length (increments 0.1)   | 24               | 24      | 19    |       |
| Ideal body weight   | Sw     | XXX.X            | 3-5 bytes variable length (increments 0.1kg) | 25               |         |       |       |
| Degree of obesity   | OV     | XXX.X            | 3-5 bytes variable length (increments 0.1%)  | 26               |         |       |       |
| Visceral fat rating | IF     | XX               | 1-2 bytes variable length                    | 27               | 25      |       |       |
| BMR (kJ)            | rb     | XXXXX            | 1-5 bytes variable length (increments 1kJ)   | 28               | 26      |       |       |
| BMR (kcal)          | rB     | XXXXX            | 1-5 bytes variable length (increments 1kcal) | 29               | 27      |       |       |
| BMR score           | rJ     | XX               | 1-2 bytes variable length (1-24)             | 30               | 28      |       |       |
| Metabolic age       | rA     | XX               | 2 bytes fixed length                         | 31               | 29      |       |       |
| Target body fat %   | gF     | XX               | 1-2 bytes variable length (4-55)             | 32               | 30      | 20    |       |
| Predicted weight    | gW     | XXX.X            | 3-5 bytes variable length (increments 0.1kg) | 33               | 31      | 21    |       |
| Predicted fat mass  | gf     | XXX.X            | 3-5 bytes variable length (increments 0.1kg) | 34               | 32      | 22    |       |
| Fat gain / lose     | gt     | XXXXX.X          | 3-7 bytes variable length (increments 0.1kg) | 35               | 33      | 23    |       |
| Impedance (50kHz)   | ZF     | XXXX.X           | 5-6 bytes variable length (increments 0.1)   | 36               | 34      | 24    |       |
| Checksum            | CS     | XX               | 2 bytes fixed length                         | 37               | 35      | 25    | 10    |

## Output sample

- Oct-09-2009, 19:59, Standard, Male, 25 years old, Height 174.5cm  
 {0,16,~0,1,~1,1,~2,1,MO,"SC-331",SN,"0000000002",ID,"000000112",Dt,"10/09/2009",TI,"19:59",Bt,0,GE,1,AG,25,  
 Hm,174.5,Pt,1.5,Wk,65.6,FW,20.3,fW,13.3,MW,52.3,mW,49.6,sW,0,bW,2.7,wW,33.6,ww,51.2,MI,22.7,  
 Sw,63.6,OV,-5.8,IF,10,rb,7134,rB,1705,rJ,10,rA,30,gF,4,gW,123.4,gf,123.4,gt,-123.4,ZF,490.9,CS,C7

## &lt;lb / ft-in mode&gt;

| Item                | Header | format           | lb / ft-in mode                              | Order of output  |         |       |       |
|---------------------|--------|------------------|----------------------------------------------|------------------|---------|-------|-------|
|                     |        |                  |                                              | Body composition |         |       | Scale |
|                     |        |                  |                                              | Adult            | Athlete | Child |       |
| Control data        | {0     |                  | 2 bytes fixed length                         | 1                | 1       | 1     | 1     |
| Control data        | ~0     |                  | 1 byte fixed length                          | 2                | 2       | 2     | 2     |
| Control data        | ~1     |                  | 1 byte fixed length                          | 3                | 3       | 3     |       |
| Control data        | ~2     |                  | 1 byte fixed length                          | 4                | 4       | 4     |       |
| Model number        | MO     | "XXXXXX"         | 8 bytes fixed length ("SC-331")              | 5                | 5       | 5     | 3     |
| Serial number       | SN     | "XXXXXXXX"       | 10 bytes fixed length                        | 6                | 6       | 6     | 4     |
| ID number           | ID     | "XXXXXXXXXX"     | 12 bytes fixed length                        | 7                | 7       | 7     | 5     |
| Date                | Dt     | "mm / dd / yyyy" | 12 bytes fixed length ("mm / dd / yyyy")     | 8                | 8       | 8     | 6     |
| Time                | TI     | "hh : mm"        | 7 bytes fixed length                         | 9                | 9       | 9     | 7     |
| Body type           | Bt     | 0 or 2           | 1 byte fixed length (0:Standard 2:Athletic)  | 10               | 10      | 10    |       |
| Gender              | GE     | 1 or 2           | 1 byte fixed length (1:Male 2:Female)        | 11               | 11      | 11    |       |
| Age                 | AG     | XX               | 1-2 bytes variable length                    | 12               | 12      | 12    |       |
| Height              | Hi     | XX.X             | 4 bytes variable length (in)                 | 13               | 13      | 13    |       |
| Preset tare         | Pt     | XX.X             | 3-4 bytes variable length (increments 0.2lb) | 14               | 14      | 14    | 8     |
| Body weight         | Wp     | XXX.X            | 3-5 bytes variable length (increments 0.2lb) | 15               | 15      | 15    | 9     |
| Fat %               | FW     | XX.X             | 3-4 bytes variable length (increments 0.1%)  | 16               | 16      | 16    |       |
| Fat mass            | fW     | XXX.X            | 3-5 bytes variable length (increments 0.2lb) | 17               | 17      | 17    |       |
| FFM                 | MW     | XXX.X            | 3-5 bytes variable length (increments 0.2lb) | 18               | 18      | 18    |       |
| Muscle mass         | mW     | XXX.X            | 3-5 bytes variable length (increments 0.2lb) | 19               | 19      |       |       |
| Muscle score        | sW     | XX               | 1-2 bytes variable length (1-24)             | 20               | 20      |       |       |
| Bone mass           | bW     | XXX.X            | 3-5 bytes variable length (increments 0.2lb) | 21               | 21      |       |       |
| Body water          | wW     | XXX.X            | 3-5 bytes variable length (increments 0.2lb) | 22               | 22      |       |       |
| Body water %        | ww     | XX.X             | 4 bytes fixed length (increments 0.1%)       | 23               | 23      |       |       |
| BMI                 | MI     | XXX.X            | 3-5 bytes variable length (increments 0.1)   | 24               | 24      | 19    |       |
| Ideal body weight   | Sw     | XXX.X            | 3-5 bytes variable length (increments 0.2lb) | 25               |         |       |       |
| Degree of obesity   | OV     | XXX.X            | 3-5 bytes variable length (increments 0.1%)  | 26               |         |       |       |
| Visceral fat rating | IF     | XX               | 1-2 bytes variable length                    | 27               | 25      |       |       |
| BMR (kJ)            | rb     | XXXXX            | 1-5 bytes variable length (increments 1kJ)   | 28               | 26      |       |       |
| BMR (kcal)          | rB     | XXXXX            | 1-5 bytes variable length (increments 1kcal) | 29               | 27      |       |       |
| BMR score           | rJ     | XX               | 1-2 bytes variable length (1-24)             | 30               | 28      |       |       |
| Metabolic age       | rA     | XX               | 2 bytes fixed length                         | 31               | 29      |       |       |
| Target body fat %   | gF     | XX               | 1-2 bytes variable length (4-55)             | 32               | 30      | 20    |       |
| Predicted weight    | gW     | XXX.X            | 3-5 bytes variable length (increments 0.2lb) | 33               | 31      | 21    |       |
| Predicted fat mass  | gf     | XXX.X            | 3-5 bytes variable length (increments 0.2lb) | 34               | 32      | 22    |       |
| Fat gain / lose     | gt     | XXXXX.X          | 3-7 bytes variable length (increments 0.2lb) | 35               | 33      | 23    |       |
| Impedance (50kHz)   | ZF     | XXXX.X           | 5-6 bytes variable length (increments 0.1)   | 36               | 34      | 24    |       |
| Checksum            | CS     | XX               | 2 bytes fixed length                         | 37               | 35      | 25    | 10    |

## Body composition measurement by the BIA method.

### Introduction

This equipment provides estimated values for each measured value of body fat percentage, fat mass, fatfree mass, muscle mass and bone mass by the DXA method, estimated value for the total body water measured value by the dilution method and estimated value for the visceral fat rating by MRI method using the Bioelectrical Impedance Analysis (BIA method).

For measurement, a mode must be selected based on body type.

- 1) Standard (for 5-99 years of age)
- 2) Athletic (for Athletic persons who exercise considerably more than non-athlete)

Making a distinction by body type in the measurement mode produces more reliable body composition measurements for athletic persons, whose body compositions differ from those of average persons.

### - Principles of body composition measurement

BIA is a means of measuring body composition – fat mass, predicted muscle mass, etc. – by measuring bioelectrical impedance in the body. Fat within the body allows almost no electricity to pass through, while electricity passes rather easily through water, much of which is found in muscles. The degree of difficulty with which electricity passes through a substance is known as the electrical resistance, and the percentage of fat and other body constituents can be inferred from measurements of this resistance.

The Tanita Body Composition Analyzer measures body composition using a constant current source with a high frequency current (50kHz, 90µA). The 8 electrodes are positioned so that electric current is supplied from the electrodes on the tips of the toes of both feet, and voltage is measured on the heel of both feet. The current flows into the upper limbs or lower limbs, depending on the body part(s) to be measured.

### - What is the DXA method?

DXA was originally designed to measure bone mineral content, but in the full-body scan mode the body fat percentage, fat mass, and fat free mass of individual body parts (arms, legs, trunk) can also be measured. The image below shows one example of body composition measurement results obtained by DXA.

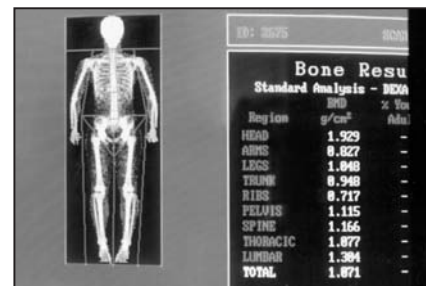

Body composition measurement results obtained by DXA (Lunar Co., Ltd; DPX-L)

### - What is dilution method?

In the dilution method, a labeled substance for a known amount is given and the concentration in equilibrium diffusing evenly is measured to obtain the total amount of the solvent that dilutes the labeled substance.

To measure the total body water (TBW), deuterium oxide (D<sub>2</sub>O) is generally used as the labeled substance. Deuterium oxide uses the overall total body water as dilution space so the total body water can be obtained. To obtain the extracellular fluid amount, sodium bromide (NaBr) is used as a labeled substance. Bromine (Br) is said to not enter the inside of cells, and uses extracellular fluid as the dilution space.

### - What is the visceral fat?

Visceral Adipose Tissue (VAT) has been associated with increased risk of developing lifestyle-related diseases. Accordingly, knowing and periodically checking the estimated VAT accumulation serves as one factor of a number of factors in assessing the prevention of lifestyle related diseases.

Tanita has developed the technology for measuring the VAT accumulation risk through bioelectrical impedance analysis (BIA) in comparison with image analysis applied to magnetic resonance imaging (MRI), in addition to the established technology for measuring the percent of body fat. The VAT accumulation risk is calculated by estimating the VAT area by the BIA method on the basis of MRI image processing. This method has a higher correlation than the estimation of the VAT accumulation risk based on BMI or abdominal circumference (waist circumference), allowing estimation that corresponds more precisely to individuals.

\*The VAT area by MRI is calculated by carrying out an image processing of the cross section of the lumbar vertebra L4-L5 regions.

(Fig. 1 - Fig. 3: Research results by N. Y. Columbia University and Jikei University Published by the North American Association for the Study of Obesity [NAASO] in 2004.)

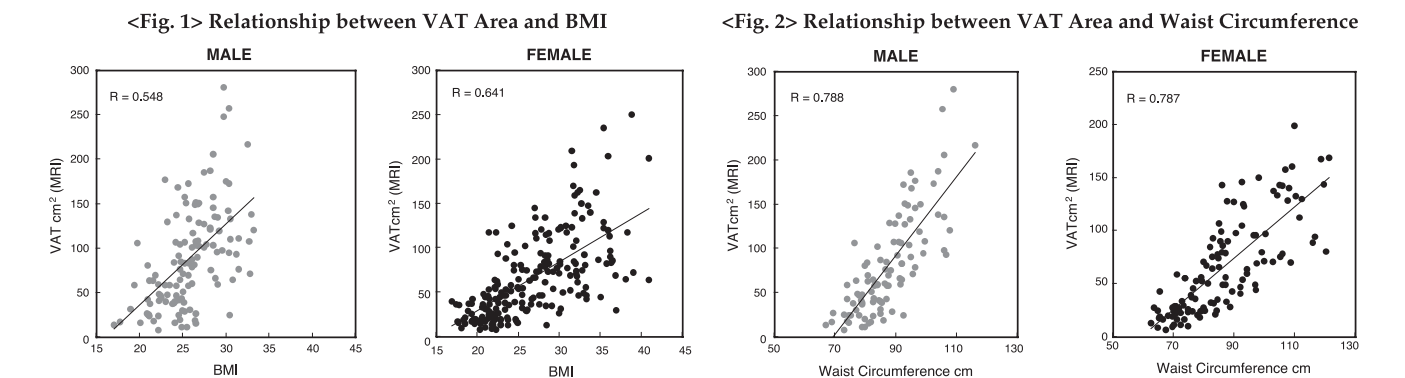

<Fig. 3> Relationship between VAT Area by MRI and Estimated VAT Area by Tanita's BIA

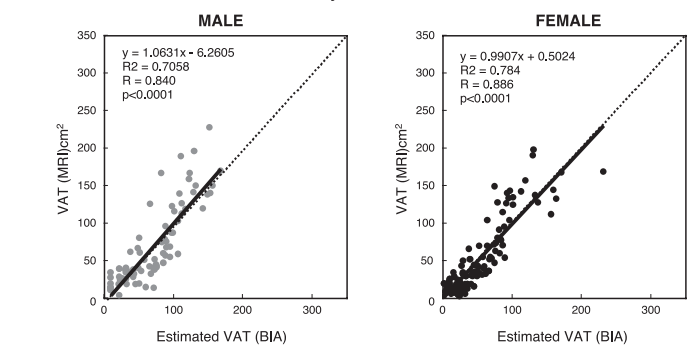



## - Factors giving errors in measurement

In the BIA method, impedance is measured and the body composition is calculated based on the value. It is known that impedance changes by the amount of the total body water that occupies about 60% of weight and the change in its distribution and temperature change. Therefore, for the purpose of research or for daily repeating of measurements, the measurement conditions must be kept constant. Measurement under the changing conditions of temperature and total body water distribution or blood flow volume of extremities due to exercising, taking a bath, etc., affects the measurement result since the electric resistance in the body also changes.

Therefore, it is recommended to measure under the following conditions for stable measurement.

- 1) 3 hours have passed after getting up and normal lifestyle activities are carried out during this period. (The impedance transits staying at a high level if you remain sitting after getting up or drive a car, etc.)
- 2) 3 hours or more have passed after eating. (For 2 – 3 hours after eating, the impedance has a tendency to decrease.)
- 3) 12 hours or more have passed after vigorous exercise for measurement. (The tendency toward changes in impedance is not stable depending on the type and rigorousness of the exercise.)
- 4) If possible urinate before taking measurement.
- 5) For repeated measurements, measure at the same hour as much as possible. (At the same time of measurement of weight, the measurements can be made more stable by measuring at the same time of the day)

Very stable measured values can be obtained by measuring under the above conditions.

And in the development of this equipment, the following 6 items were set as conditions for the regression equation.

- 1) Prohibition of alcohol intake for 12 hours before measurement
- 2) Prohibition of excessive exercise for 12 hours before measurement.
- 3) Prohibition of excessive eating and drinking the day before measurement
- 4) Prohibition of eating and drinking for 3 hours before measurement
- 5) Urination just before measurement
- 6) Avoid measurements during menstruation (for female)

## 2) Inter-day changes

The diagrams below offer examples of actual measurements made of inter-day changes. A study was done to determine the degree of change in the impedance between the feet during dehydration; the first two days represent a normal daily routine, while in the latter two days a state of dehydration was induced using a sauna.

No significant inter-day change was measured in body weight, impedance between the feet, or body fat percentage during the normal daily routine. During the dehydrated state, however, a drop in body weight of 1kg was noted, with the impedance between the feet rising approximately  $15\Omega$  on the first day of dehydration and  $30\text{--}35\Omega$  on the second day. As a result, body fat percentage was up by around 1% on the first day of dehydration and by 1.5-2% on the second day.

As mentioned earlier, impedance increases when body weight is reduced (such as by dehydration), and decreases when body weight is increased through excess consumption of food and drink. The inter-day change in impedance is thus inversely proportional to the change in body weight.

These inter-day changes stem from such causes as:

- 1) Temporary increases in body weight (total body water) through overeating and overdrinking
- 2) Dehydration due to heavy sweating during vigorous exercise
- 3) Dehydration due to alcohol consumption or the use of diuretics
- 4) Dehydration due to heavy sweating during saunas, etc.

Accordingly, it is recommended that instructions be provided to the subject to help eliminate these causes when accurate measurements are needed.

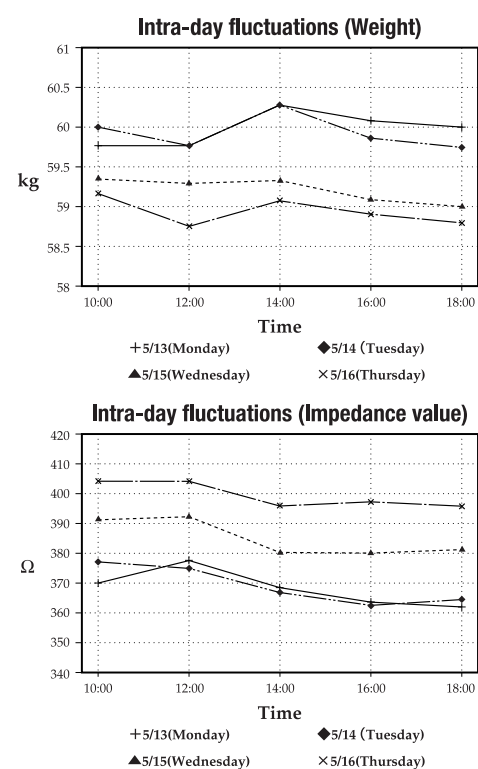

# The Regression Formula for Basal Metabolic Rate (BMR)

It has long been said among medical and nutritional specialists that "The Basal Metabolic Rate (BMR) is more determined by the Fat Free Mass (FFM) than by the body weight" (Persons of a given body weight with a higher FFM will have a higher BMR), and that from the aspect of evaluating the body composition, should be estimated from the FFM. In addition, in cases of simple estimation formulae which can calculate from the height, weight and age, without evaluating the body composition, there was a problem with excessively high evaluations being given to obese persons with large body weight, and conversely excessively small BMR evaluations given to muscular athletes, though these are not as many in number. Currently, the BMR estimation recursion formula developed by Tanita, the manufacturer of body composition analyzers, based on their research, works by multiple regressive analysis using this FFM, and has a higher degree of accuracy in the individual differences in body composition. In order to derive the BMR, resting respiratory metabolism (Resting Energy Expenditure: REE) was measured using a breath gas analysis device, and this estimation recursion formula was created based on this data.

**<Figure 1> The Relationship Between Resting Energy Expenditure (REE) According to Breath Gas Analysis and Weight, FFM**

(Presented at Nutrition Week, Held in San Diego in 2002)

As shown in Figure 1: the REE (BMR) has a stronger relationship to the FFM than to body weight, and a difference is visible between males and females in the distribution trends. We see that in principle that we should calculate from the FFM rather than by the old formula centred on the relationship with weight.

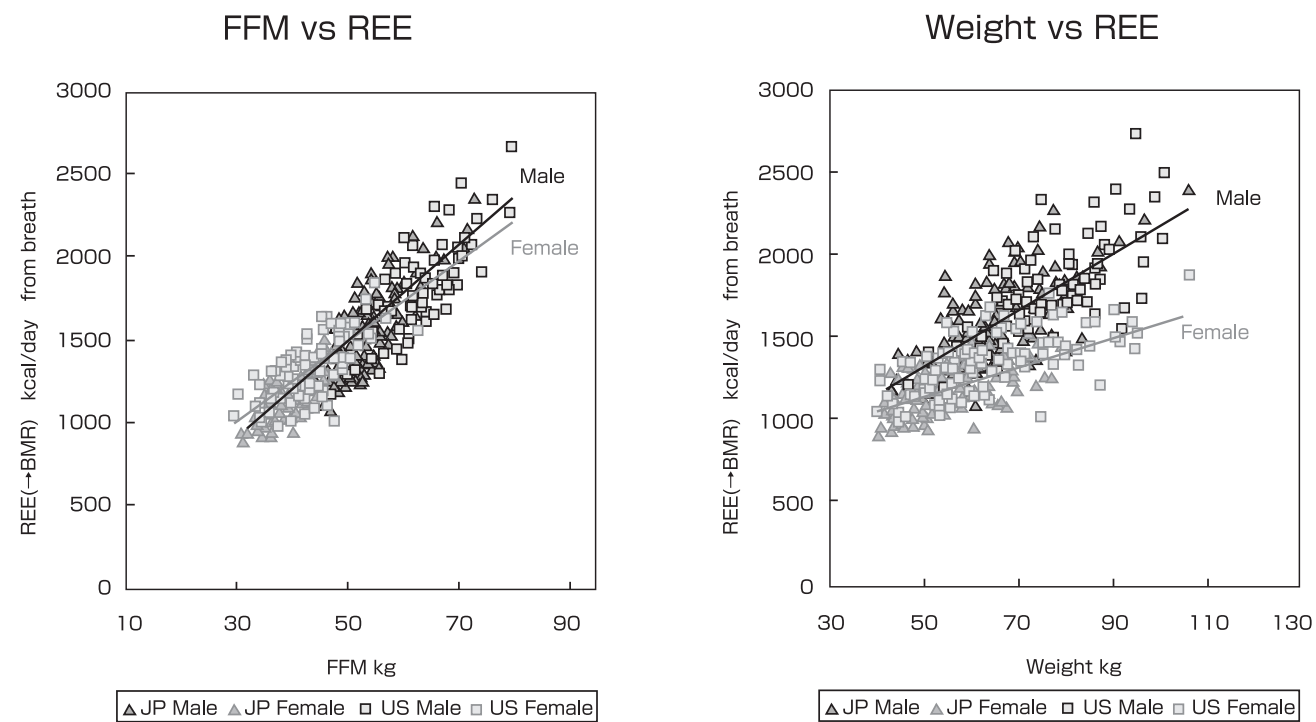

**<Figure 2> Comparison of BMR Values from the TANITA Multiple regression model and Breath Analysis**

(Presented at Nutrition Week Held in San Diego in 2002)

The current BMR retrogression formula is a formula which acts on the principle of using the FFM value from the results of body composition measurement according to the BIA. A good relationship is shown in the BMR value based on actual breath analysis REE or  $R=0.9$  ( $p<0.0001$ ). These results were presented at the First Annual Nutrition Week (American College of Nutrition, American Society for Clinical Nutrition, American Society for Parenteral and Enteral Nutrition, North American Association for the Study of Obesity) held in 2002 in San Diego.

**NOTE:** This model has been calibrated for those between ages of 18-84. Those individuals outside of this age range may not be obtain accurate readings.

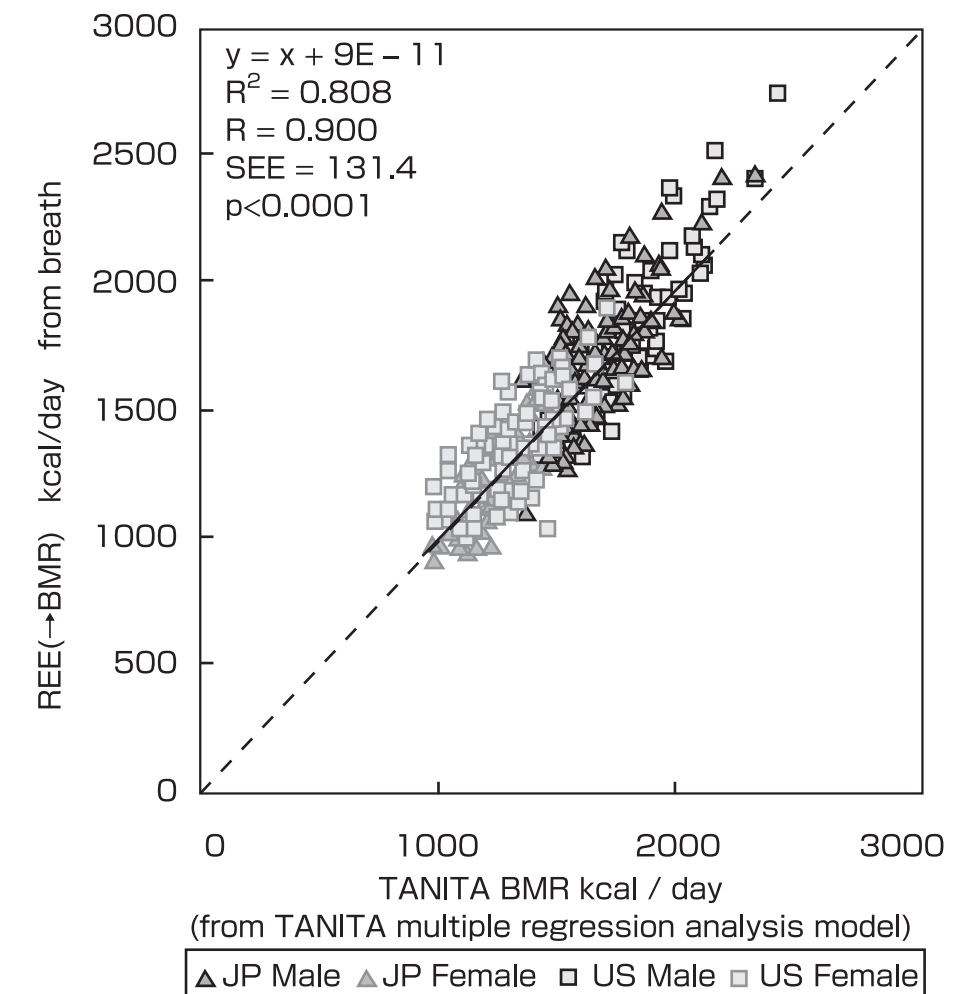

# Specifications

Eng

When necessary  
(Specifications)

|                              |                                              |                                                                |                                         |  |
|------------------------------|----------------------------------------------|----------------------------------------------------------------|-----------------------------------------|--|
| <b>Model number</b>          |                                              | SC-331S                                                        |                                         |  |
| <b>Power source</b>          |                                              | AC adapter (included) Center Minus                             |                                         |  |
|                              |                                              | Input Voltage: 100-240 VAC 50/60 Hz 1.5A Output Voltage: 7 VDC |                                         |  |
|                              |                                              | Rated Current: 4 A No Load Input Voltage: 7VDC                 |                                         |  |
| <b>Power Consumption</b>     |                                              | 28 W                                                           |                                         |  |
| <b>Impedance Measurement</b> | <b>Measurement System</b>                    | Tetra polar Bioelectrical Impedance Analysis                   |                                         |  |
|                              | <b>Measurement Frequency</b>                 | 50 kHz                                                         |                                         |  |
|                              | <b>Measurement Current</b>                   | 90 μA                                                          |                                         |  |
|                              | <b>Electrode Material</b>                    | Pressure Contact Stainless Steel Foot Pads                     |                                         |  |
|                              | <b>Measurement Style</b>                     | Between Both Feet                                              |                                         |  |
|                              | <b>Measurement Range</b>                     | 150 - 1200Ω                                                    |                                         |  |
|                              | <b>Accuracy at first calibration</b>         | ± 2%                                                           |                                         |  |
| <b>Weight Measurement</b>    | <b>Measurement System</b>                    | Strain Gauge Load Cell                                         |                                         |  |
|                              | <b>Maximum Capacity / Minimum Graduation</b> | 270 kg / 0.1 kg<br>600 lb / 0.2 lb                             |                                         |  |
|                              | <b>Accuracy at first calibration</b>         | ± 0.2 kg / ± 0.4 lb                                            |                                         |  |
| <b>Input Items</b>           | <b>Clothes Weight</b>                        | 0 - 10 kg / 0.1 kg increments                                  | 0 - 20 lb / 0.2 lb increments           |  |
|                              | <b>Gender</b>                                | Male / Female                                                  |                                         |  |
|                              | <b>Body Type</b>                             | Standard (5 - 99 years) / Athletic (18 - 99 years)             |                                         |  |
|                              | <b>Age</b>                                   | 5 - 99 years old / 1 year increments                           |                                         |  |
|                              | <b>Height</b>                                | 90.0 - 249.9 cm / 0.1 cm increments                            | 3 ft - 7 ft 11.5 in / 0.5 in increments |  |
|                              | <b>Target Body Fat %</b>                     | 4 - 55 %                                                       |                                         |  |

Eng

When necessary  
(Specifications)

|                     |                                                     |                                           |                                                    |                                         |  |
|---------------------|-----------------------------------------------------|-------------------------------------------|----------------------------------------------------|-----------------------------------------|--|
| <b>Output Items</b> | <b>Display</b>                                      | <b>Target Body Fat %</b>                  | 4 - 55 %                                           |                                         |  |
|                     |                                                     | <b>Weight</b>                             | 0 - 270 kg / 0.1 kg increments                     | 600lb / 0.2 lb increments               |  |
| <b>Gender</b>       |                                                     | Male / Female                             |                                                    |                                         |  |
| <b>Body Type</b>    |                                                     | Standard / Athletic                       |                                                    |                                         |  |
| <b>Age</b>          |                                                     | 5 - 99 years old / 1 year increments      |                                                    |                                         |  |
| <b>Height</b>       |                                                     | 90.0 - 249.9 cm / 0.1 cm increments       | 3 ft - 7 ft 11.5 in / 0.5 in increments            |                                         |  |
|                     | <b>FAT%</b>                                         | 3 - 75% / 0.1% increments                 |                                                    |                                         |  |
|                     | <b>Print-out</b>                                    | <b>Logo</b>                               | TANITA LOGO (240x64 dot)                           |                                         |  |
|                     |                                                     | <b>Model number</b>                       | SC-331S                                            |                                         |  |
|                     |                                                     | <b>Date and Time</b>                      | 2009 / 1 / 1 - 2099 / 12 / 31                      |                                         |  |
|                     |                                                     | <b>Serial Number</b>                      | 00000001 - 99999999                                |                                         |  |
|                     |                                                     | <b>ID</b>                                 | 000000000 - 999999999                              |                                         |  |
|                     |                                                     | <b>Body Type</b>                          | Standard (5 - 99 years) / Athletic (18 - 99 years) |                                         |  |
|                     |                                                     | <b>Gender</b>                             | Male / Female                                      |                                         |  |
|                     |                                                     | <b>Age</b>                                | 5 - 99 years old / 1 year increments               |                                         |  |
|                     |                                                     | <b>Height</b>                             | 90.0 - 249.9 cm / 0.1 cm increments                | 3 ft - 7 ft 11.5 in / 0.5 in increments |  |
|                     |                                                     | <b>Clothes Weight</b>                     | 0 - 10 kg / 0.1 kg increments                      | 0 - 20 lb / 0.2 lb increments           |  |
|                     |                                                     | <b>Weight</b>                             | 0 - 270 kg / 0.1 kg increments                     | 600lb / 0.2 lb increments               |  |
|                     |                                                     | <b>FAT%</b>                               | 3 - 75% / 0.1% increments                          |                                         |  |
|                     |                                                     | <b>Fat Mass</b>                           | 0.1 kg increments                                  | 0.2 lb increments                       |  |
|                     |                                                     | <b>FFM</b>                                | 0.1 kg increments                                  | 0.2 lb increments                       |  |
|                     |                                                     | <b>Muscle Mass</b>                        | 0.1 kg increments                                  | 0.2 lb increments                       |  |
|                     |                                                     | <b>TBW</b>                                | 0.1 kg increments                                  | 0.2 lb increments                       |  |
|                     |                                                     | <b>TBW%</b>                               | 15 - 85% / 0.1% increments                         |                                         |  |
|                     |                                                     | <b>Predicted Fat Mass</b>                 | 0.1 kg increments                                  | 0.2 lb increments                       |  |
|                     |                                                     | <b>BMR</b>                                | 1 kJ increments / 1 kcal increments                |                                         |  |
|                     |                                                     | <b>Metabolic Age</b>                      | 1 years increments ( 12 - 90 years)                |                                         |  |
|                     |                                                     | <b>Visceral FAT Rating</b>                | 1 Level increments ( 1-59 Level)                   |                                         |  |
|                     |                                                     | <b>BMI</b>                                | 0.1 increments                                     |                                         |  |
|                     |                                                     | <b>Predicted Weight</b>                   | 0.1 kg increments                                  | 0.2 lb increments                       |  |
|                     |                                                     | <b>Desirable range</b>                    | 3 - 75% / 0.1% increments                          |                                         |  |
|                     | <b>Indicator - FAT %</b>                            |                                           |                                                    |                                         |  |
|                     | <b>Indicator - BMI</b>                              |                                           |                                                    |                                         |  |
|                     | <b>Indicator - Visceral FAT Level</b>               |                                           |                                                    |                                         |  |
|                     | <b>Indicator - Muscle Mass</b>                      |                                           |                                                    |                                         |  |
|                     | <b>Indicator - BMR</b>                              |                                           |                                                    |                                         |  |
|                     | <b>Physique Rating</b>                              |                                           |                                                    |                                         |  |
|                     | <b>Impedance</b>                                    | 150 - 1200Ω                               |                                                    |                                         |  |
|                     | <b>Display</b>                                      | 3 Rows, 5 Digits LCD                      |                                                    |                                         |  |
|                     | <b>Output Data Interface</b>                        | USB                                       |                                                    |                                         |  |
|                     | <b>Temperature Range of Usage</b>                   | 32°F to 95°F / 0°C to 35°C                |                                                    |                                         |  |
|                     | <b>Relative Humidity</b>                            | 30 - 80% (without condensation)           |                                                    |                                         |  |
|                     | <b>Weight of Equipment (Remote Display Version)</b> | 6.8 kg                                    | 15.0 lb                                            |                                         |  |
|                     | <b>Weight of Equipment (Column Mounted Version)</b> | 12.1kg                                    | 26.7 lb                                            |                                         |  |
| <b>Size</b>         | <b>Platform</b>                                     | 372 × 375 × 101 mm (14.6 × 14.8 × 4.0 in) |                                                    |                                         |  |
|                     | <b>Height (Column Mounted Version)</b>              | 1024 mm (40.3in)                          |                                                    |                                         |  |

USA and Canada

#### Federal Communications Commission and Canadian ICES Notice

This equipment has been tested and found to comply with the limits for a Class B digital device, pursuant to Part 15 of the FCC Rules and Canadian ICES-003. These limits are designed to provide reasonable protection against harmful interference in a residential installation. This equipment generates, uses and can radiate radio frequency energy and, if not installed and used in accordance with the instructions, may cause harmful interference to radio communications. However, there is no guarantee that interference will not occur in a particular installation. If this equipment does cause harmful interference to radio or television reception, which can be determined by turning the equipment off and on, the user is encouraged to try to correct the interference by one or more of the following measures:

- Reorient or relocate the receiving antenna.
- Increase the separation between the equipment and receiver.
- Connect the equipment into an outlet on a circuit different from that to which the receiver is connected.
- Consult the dealer or an experienced radio or television technician for help.

#### Modifications

The FCC requires the user to be notified that any changes or modifications made to this device that are not expressly approved by Tanita Corporation may void the user's authority to operate the equipment.

### Disposal

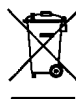

This equipment is electronic device. Please dispose of this equipment appropriately as not the general household waste but electronic equipment. Please follow a regional regulation when you dispose of this.

<U.S.A. representative>

## TANITA<sup>®</sup> Corporation of America, Inc.

2625 South Clearbrook Drive, Arlington Heights, Illinois 60005, U.S.A. TEL: 1-847-640-9241 FAX: 1-847-640-9261 <http://www.tanita.com>

<Manufacturer>

## TANITA<sup>®</sup> Corporation

1-14-2, Maeno-cho, Itabashi-ku, Tokyo 174-8630, Japan TEL: +81 (0) 3-3968-7048 FAX: +81 (0) 3-3967-3766 <http://www.tanita.co.jp>

#### TANITA Europe B.V.

Hoogoorddreef 56-E,  
1101 BE Amsterdam, the Netherlands  
TEL: +31-20-560-2970  
FAX: +31-20-560-2988  
<http://www.tanita.eu>

#### TANITA Health Equipment H.K.LTD.

Unit 301-303, Wing On Plaza, 3/F., 62 Mody Road,  
Tsimshatsui East, Kowloon, Hong Kong  
TEL: +852-2834-3917  
FAX: +852-2838-8667  
[www.tanita.asia](http://www.tanita.asia)

#### TANITA India Private Limited

A-502, Mittal Commercial, Off. M.V. Road (Andheri Kurla Road),  
Marol, Andheri-East, Mumbai 400 059 INDIA  
TEL: +91-22-3192-6107  
FAX: +91-22-2859-9143  
[www.tanita.co.in](http://www.tanita.co.in)

#### TANITA (Shanghai) Trading Co., Ltd.

Room 8005, 877 Huai Hai Zhong Lu, Shanghai,  
The People's Republic of China  
TEL: +86-21-6474-6803  
FAX: +86-21-6474-7901  
[www.tanita.com.cn](http://www.tanita.com.cn)



# ANALIZADOR DE COMPOSICIÓN CORPORAL **SC-331S**

## Manual de instrucciones

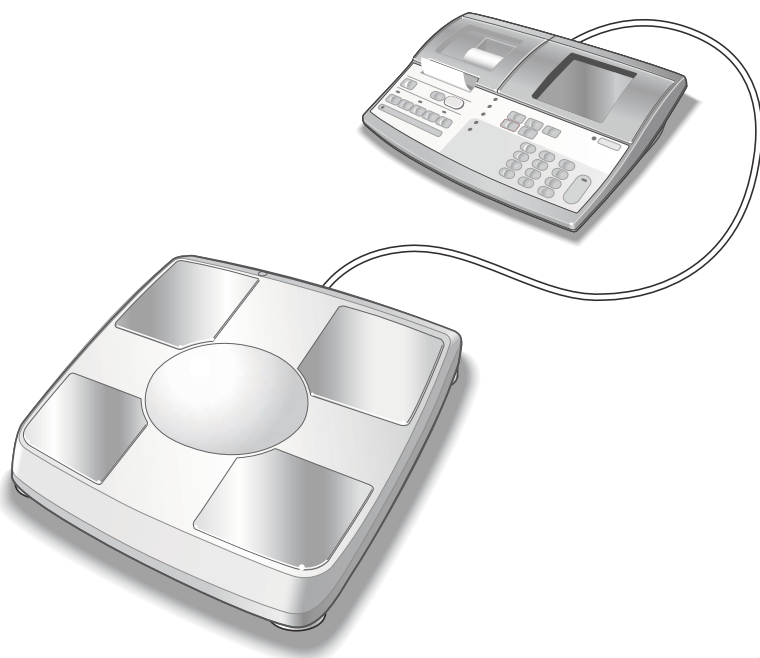

SC-331S  
VERSIÓN CON UNIDAD DE  
VISUALIZACIÓN REMOTA

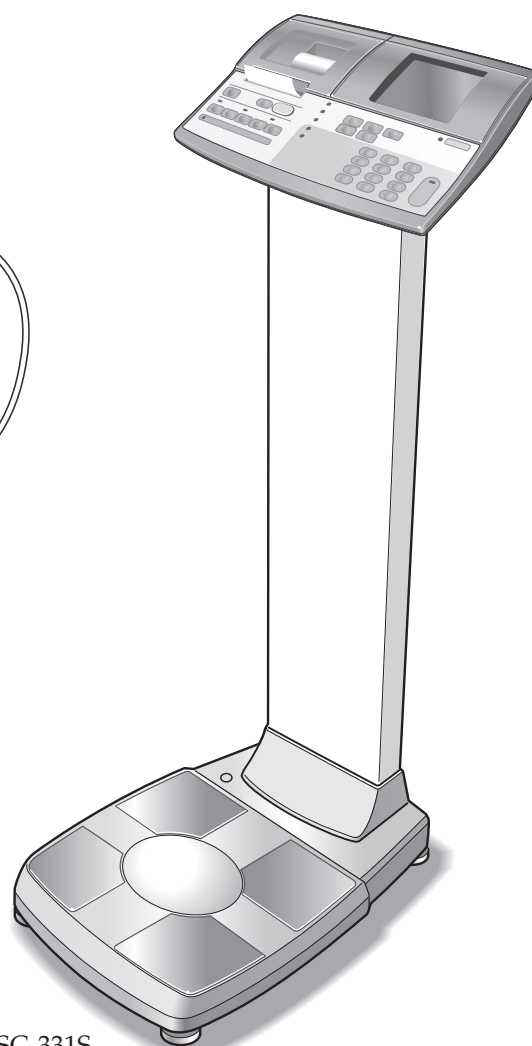

SC-331S  
VERSIÓN MONTADA EN COLUMNA

### <Condiciones de uso>

Intervalo de temperatura de uso: **0°C – 35°C**  
Humedad relativa : **30% – 80%**  
(sin condensación)  
Altitud máxima : **2,000m ASL**  
Gama de presión de Medio Ambiente : **86kPa - 106kPa**

### <Condiciones de almacenamiento>

Intervalo de temperatura ambiental : **-10°C – 60°C**  
Intervalo de humedad relativa : **10% – 90%** (sin condensación)  
Para evitar problemas de funcionamiento no almacene este equipo donde haya luz solar directa, cambios significativos de temperatura, riesgo de humedad, mucho polvo, fuego cercano o donde haya riesgo de que reciba choques o vibraciones.

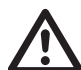

Lea atentamente este MANUAL DE INSTRUCCIONES y téngalo a mano para posibles consultas.

## Uso previsto

- Este equipo puede usarse en la detección de ciertas enfermedades de los adultos y condiciones relacionadas con el peso y composición corporal.
- El equipo puede usarse en el control y prevención de afecciones causadas por depósitos excesivos de tejido graso, tales como diabetes, hiperlipidemia, colelitiasis (cálculos biliares) e hígado graso.
- El equipo puede usarse en el control de cambios en la composición corporal de las personas relacionados con la razón de tejido graso a tejido magro.
- El equipo puede usarse para evaluar la efectividad de los programas de nutrición y ejercicios de las personas para la salud y el bienestar físico.
- El analizador de composición corporal Tanita Body Composition Analyzer es indicado para uso en la medición de peso e impedancia y el presupuesto del índice de masa corporal (BMI), el porcentaje de grasa corporal total agua corporal, la masa muscular (esquelética y lisa), Tipo de cuerpo, la masa ósea, el nivel de grasa visceral con margen saludable, el índice del metabolismo basal (BMR), la edad metabólica, y con el enfoque al porcentaje de grasa corporal con peso y masa grasa predichos, usando BIA (análisis de la impedancia Bioeléctrica).

El dispositivo es indicado para el uso para niños sanos de 5-17 años y adultos sanos con vidas activas, vidas moderadas, o de vidas inactivas.

## Eficacia

1. Este equipo es fácil de usar y no requiere instalaciones especializadas ni experiencia para tomar las mediciones.
2. Las mediciones pueden tomarse en forma rápida y sencilla, causando un mínimo de inconvenientes al paciente durante la medición.

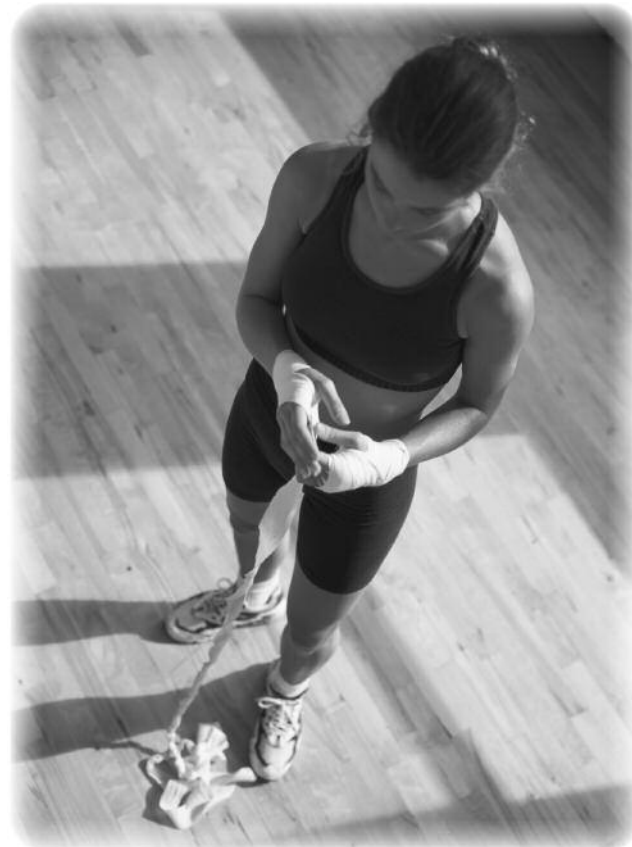

## Índice

### Antes de utilizar

|                                                     |     |
|-----------------------------------------------------|-----|
| Notas sobre seguridad.....                          | 128 |
| Nombre de los componentes / método de conexión..... | 132 |
| Preparación.....                                    | 135 |
| Varios parámetros.....                              | 136 |

### Instrucciones de uso

|                                                                   |     |
|-------------------------------------------------------------------|-----|
| Instrucciones de uso.....                                         | 152 |
| • Al usar la máquina como analizador de composición corporal..... | 152 |
| • Índice de grasa corporal deseado.....                           | 162 |
| • Al utilizar la máquina como báscula.....                        | 163 |
| Diversos criterios.....                                           | 166 |

### Cuando sea necesario

|                                                                                |     |
|--------------------------------------------------------------------------------|-----|
| Daño a la unidad.....                                                          | 172 |
| Conexión a un ordenador personal.....                                          | 174 |
| Aspectos técnicos.....                                                         | 178 |
| La nueva fórmula de regresión para calcular la Tasa Metabólica Basal (MB)..... | 182 |
| Especificaciones.....                                                          | 184 |

# Para su seguridad

Esta sección explica las medidas de precaución que deben tomarse para evitar lesiones a los usuarios de este dispositivo y a otras personas, así como para evitar daños a la propiedad. Es recomendable que se familiarice con esta información para garantizar la operación segura de este equipo.

|                                                                                   |                    |                                                                                                           |
|-----------------------------------------------------------------------------------|--------------------|-----------------------------------------------------------------------------------------------------------|
|  | <b>Advertencia</b> | No seguir las instrucciones resaltadas con este símbolo podría producir la muerte o una lesión grave.     |
|  | <b>Precaución</b>  | No seguir las instrucciones resaltadas con este símbolo podría producir una lesión o daño a la propiedad. |
|  |                    | Este símbolo indica las acciones que están prohibidas.                                                    |
|  |                    | Este símbolo indica las instrucciones que siempre deben seguirse.                                         |

## Advertencia

|                                                                                     |                                                                                                                                                                                                 |                                                                                       |
|-------------------------------------------------------------------------------------|-------------------------------------------------------------------------------------------------------------------------------------------------------------------------------------------------|---------------------------------------------------------------------------------------|
|  | <b>Este equipo no debe usarse en personas con marcapasos o cualquier otro implante mecánico.</b>                                                                                                |   |
|                                                                                     | Este equipo envía una pequeña corriente eléctrica a través del cuerpo, la cual podría interferir o causar el mal funcionamiento de los implantes médicos eléctricos, produciendo un grave daño. |                                                                                       |
|                                                                                     | <b>No manipule el enchufe con las manos húmedas.</b>                                                                                                                                            |  |
|                                                                                     | Esto puede producir un choque eléctrico, incendio o fuga.                                                                                                                                       |                                                                                       |
|                                                                                     | <b>Mantenga este equipo lejos de los gases inflamables y ambientes ricos en oxígeno.</b>                                                                                                        |  |
|  | <b>No modifique este equipo de ninguna forma.</b>                                                                                                                                               |  |
|                                                                                     | Esto puede producir un choque eléctrico o lesión, o puede afectar la precisión del análisis.                                                                                                    |                                                                                       |
|                                                                                     | <b>No utilice un adaptador para múltiples enchufes.</b>                                                                                                                                         |  |
|                                                                                     | <b>Utilice sólo una toma correctamente cableada.</b>                                                                                                                                            |                                                                                       |
|                                                                                     | Sólo los cables originales y los equipos se les permite.                                                                                                                                        |                                                                                       |

## Precaución

|                                                                                                                                                                                                                                                                                                                                                                                                                                         |                                                                                                                                                                                                                  |
|-----------------------------------------------------------------------------------------------------------------------------------------------------------------------------------------------------------------------------------------------------------------------------------------------------------------------------------------------------------------------------------------------------------------------------------------|------------------------------------------------------------------------------------------------------------------------------------------------------------------------------------------------------------------|
|                                                                                                                                                                                                                                                                                                                                                      | <b>Manténgalo lejos del agua.</b>                                                                                                                                                                                |
|                                                                                                                                                                                                                                                                                                                                                                                                                                         | <b>Evite usar el equipo en personas con alergias a los metales.</b>                                                                                                                                              |
|                                                                                                                                                                                                                                                                                                                                                                                                                                         | Las reacciones alérgicas pueden ser causadas por el acero inoxidable utilizado en los electrodos de este dispositivo.                                                                                            |
|                                                                                                                                                                                                                                                                                                                                                                                                                                         | <b>No salte en el equipo.</b>                                                                                                                                                                                    |
|                                                                                                                                                                                                                                                                                                                                                                                                                                         | <b>No se apoye en el equipo.</b>                                                                                                                                                                                 |
|                                                                                                                                                                                                                                                                                                                                                                                                                                         | No use este equipo cerca de otros productos que emitan ondas electromagnéticas.                                                                                                                                  |
|                                                                                                                                                                                                                                                                                                                                                                                                                                         | <b>No use este equipo cerca de otros productos que emitan ondas electromagnéticas.</b>                                                                                                                           |
|                                                                                                                                                                                                                                                                                                                                                                                                                                         | <b>No aplique fuerza a la pantalla.</b>                                                                                                                                                                          |
|                                                                                                                                                                                                                                                                                                                                                                                                                                         | El panel de la pantalla puede romperse o producir una lesión.                                                                                                                                                    |
|                                                                                                                                                                                                                                                                                                                                                                                                                                         | <b>Ayude a las personas con discapacidades.</b>                                                                                                                                                                  |
| Otra persona debe realizar las mediciones para las personas con discapacidades que afecten su capacidad de hacerlo ellas mismas.                                                                                                                                                                                                                                                                                                        |                                                                                                                                                                                                                  |
|                                                                                                                                                                                                                                                                                                                                                    | <b>Asegúrese de limpiar la plataforma de la balanza con un desinfectante adecuado después de cada uso.</b>                                                                                                       |
|                                                                                                                                                                                                                                                                                                                                                                                                                                         | <b>Manténgase lejos de la persona durante la medición para evitar un choque eléctrico y para garantizar la precisión.</b>                                                                                        |
|                                                                                                                                                                                                                                                                                                                                                                                                                                         | <b>Controle continuamente tanto a la persona como al equipo para detectar anomalías.</b>                                                                                                                         |
|                                                                                                                                                                                                                                                                                                                                                                                                                                         | Si se detecta alguna anomalía en la persona o en el equipo, tome la acción adecuada, tal como detener el equipo a la vez que garantiza la seguridad de la persona.                                               |
|                                                                                                                                                                                                                                                                                                                                                                                                                                         | <b>Desenchufe el cable de corriente alterna (CA) cuando mueva el equipo.</b>                                                                                                                                     |
|                                                                                                                                                                                                                                                                                                                                                                                                                                         | <b>La interpretación de los resultados del análisis (por ejemplo, evaluación de las mediciones y formulación de los programas de ejercicios basada en los resultados) debe ser realizada por un profesional.</b> |
| Las medidas para perder peso y los ejercicios basados en el autoanálisis podrían ser dañinos para su salud. Siga siempre el consejo de un profesional calificado.                                                                                                                                                                                                                                                                       |                                                                                                                                                                                                                  |
| <b>Este equipo está designado como un dispositivo de Clase B IT (principalmente para sistemas diseñados para utilizarse en ambientes domésticos) y tiene la certificación de CE (EMC), pero puede afectar a los dispositivos que son sensibles a las ondas electromagnéticas.</b>                                                                                                                                                       |                                                                                                                                                                                                                  |
| Si va a conectar una computadora o dispositivos periféricos a este equipo, utilice los dispositivos cumpliendo con IEC60601-1 (EN60601-1). La energía debe suministrarse desde un transformador de aislamiento para uso médico para los dispositivos IEC60950 (EN60950). Mantenga una distancia de 1,5 m entre las unidades durante la operación. No hacerlo puede producir un choque eléctrico a las personas o un mal funcionamiento. |                                                                                                                                                                                                                  |

# Para su seguridad

## Para realizar una medición precisa

### Evite realizar mediciones después de un ejercicio extenuante.

Esto puede producir mediciones inexactas. Realice las mediciones después de un descanso suficiente.

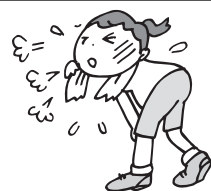

### Evite realizar mediciones después de una ingesta de alimentos o líquido en exceso o cuando esté deshidratado.

Esto puede producir mediciones inexactas. Para una mayor precisión, evite usar el equipo directamente después de levantarse. Utilícelo a la misma hora en cada ocasión, por lo menos tres horas después de cada comida.

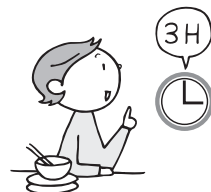

No tome medidas cuando utilice transmisores, como los teléfonos móviles, que pueden afectar las lecturas.

### Use el equipo bajo las mismas condiciones y en la misma posición, en la medida de lo posible, para registrar en forma precisa los cambios.

Las lecturas se afectan enormemente por el nivel de hidratación y la posición del cuerpo. Úselo a la misma hora del día cada vez, bajo las mismas condiciones y con la misma posición del cuerpo.

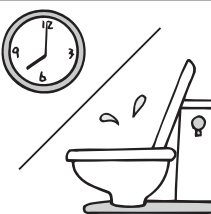

### Evite las mediciones en múltiples ubicaciones con grandes diferencias de temperaturas.

Esto puede producir mediciones inexactas. Deje que el equipo descansa por lo menos dos horas antes de usarlo, si ha sido llevado a una nueva ubicación con una diferencia de temperaturas de 20°C o más.

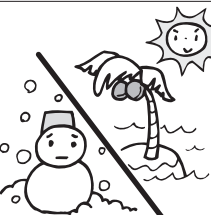

Los pies desnudos deben colocarse correctamente sobre la plataforma de electrodos.

Asegúrese de que las plantas de sus pies estén libres de exceso de suciedad, ya que esto puede actuar como un obstáculo para el paso de la suave corriente eléctrica.

### Use una ubicación estable.

Pueden producirse errores en las mediciones si el dispositivo se utiliza en una ubicación inestable.

## Mantenimiento programado

TANITA recomienda que cada instalación realice inspecciones periódicas de cada unidad.

1. Revise lo siguiente por lo menos diariamente:
  - Que la unidad esté sobre una superficie estable y nivelada
2. Inspeccione visualmente lo siguiente por lo menos semanalmente:
  - La pantalla, para detectar daños o contaminación
  - Todos los cables, cordones y extremos de los conectores, para detectar daños o contaminación
  - Todas las etiquetas relacionadas con la seguridad, para verificar que estén legibles
  - Todos los accesorios (sensores, electrodos, etc.), para detectar desgaste o daños
  - documentación de la revisión actual de los equipos
3. Inspeccione visualmente lo siguiente por lo menos mensualmente:
  - Los tornillos de montaje en la base

Actualice los ajustes, reemplace los ítems o llame al servicio técnico, según sea necesario, de acuerdo a los resultados de la inspección visual. No utilice la unidad si ve signos de daños. El equipo que está dañado debe ser inspeccionado por personal calificado para verificar su operación adecuada antes de usarlo nuevamente.

El equipo debe ser inspeccionado de acuerdo con la normativa de cada país.

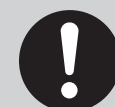

Siempre...

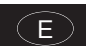

Antes de utilizar  
(Para su seguridad)

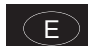

Antes de utilizar  
(Para su seguridad)



# Nombre de los componentes / método de conexión

## Versión con unidad de visualización remota

### Caja de control

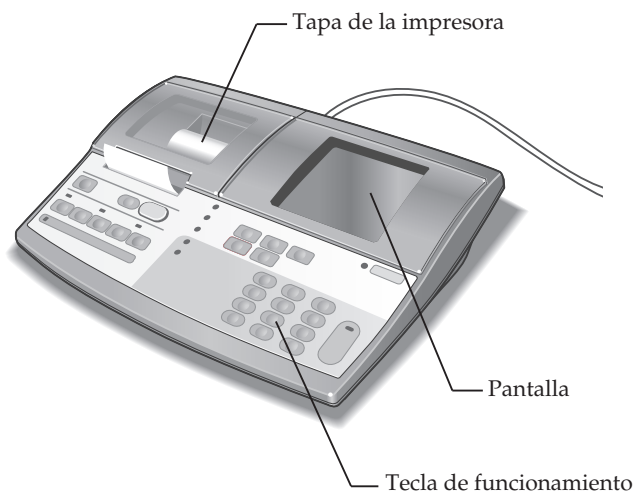

### Plataforma

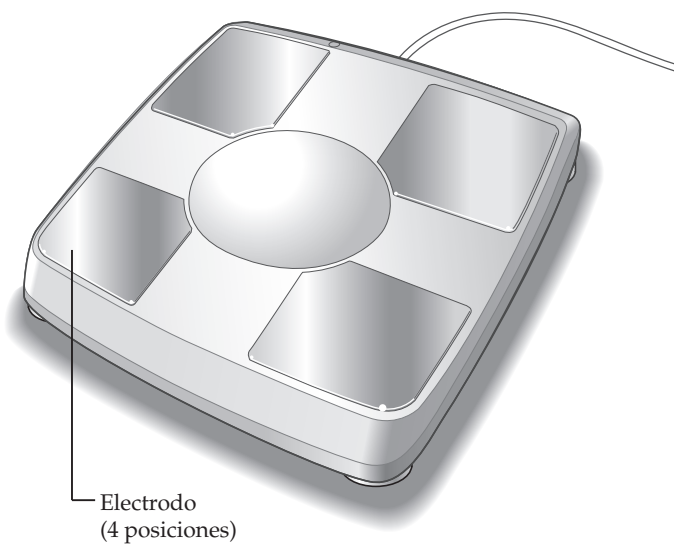

### Accesorios

- Manual de instrucciones (este manual)
- Guía de funcionamiento
- D-ROM (controlador USB)
- Adaptador de alimentación de CA
- Cable de corriente alterna
- Cuentagotas 1 unidad
- Rollo de papel de impresora (Papel térmico común; diámetro del rollo: 55 mm, longitud del rollo: aprox. 34 m)  
\* Para obtener más información, póngase en contacto con el distribuidor que le vendió el producto.

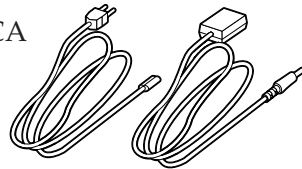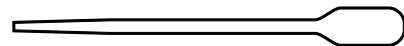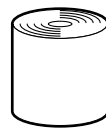

## Versión montada en columna

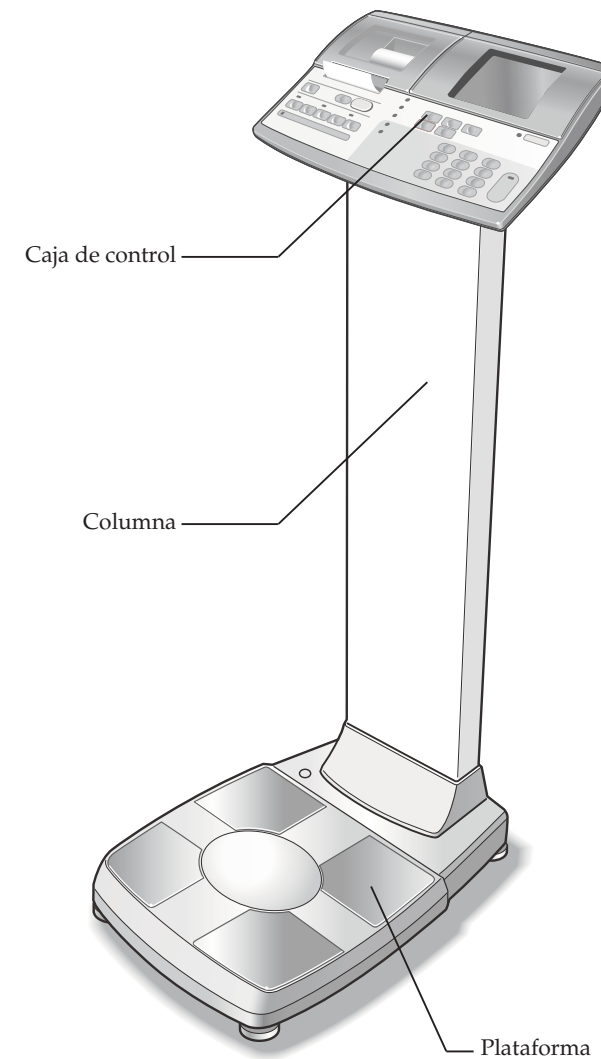

### Accesorios

- Manual de instrucciones (este manual)
- Guía de funcionamiento
- D-ROM (controlador USB)
- Montaje de guía
- Adaptador de alimentación de CA
- Cable de corriente alterna
- Llave hexagonal (1 unidad)
- Pernos de cabeza hexagonal (M5L12) (4 unidades)
- Cuentagotas 1 unidad
- Rollo de papel de impresora (Papel térmico común; diámetro del rollo: 55 mm, longitud del rollo: aprox. 34 m)  
\* Para obtener más información, póngase en contacto con el distribuidor que le vendió el producto.

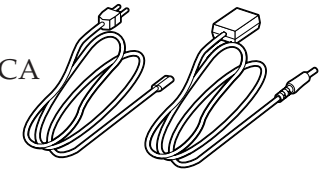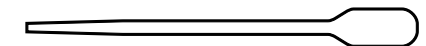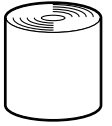

**PRECAUCIONES** Asegúrese de que la plataforma de medición esté situada sobre una superficie nivelada y estable. Si la plataforma de medición no se encuentra estable debido, por ejemplo, a que no todas las patas se apoyan en el suelo, existe el riesgo de dar un traspies o de que las mediciones sean inexactas.

**PRECAUCIONES** Asegúrese de que la plataforma de medición esté situada sobre una superficie nivelada y estable. Si la plataforma de medición no se encuentra estable debido, por ejemplo, a que no todas las patas se apoyan en el suelo, existe el riesgo de dar un traspies o de que las mediciones sean inexactas.

Antes de utilizar  
(Nombre de los componentes / método de conexión)

Antes de utilizar  
(Nombre de los componentes / método de conexión)

## Caja de control (nombre de las teclas)

**Tecla de alimentación de papel**  
Para alimentar el papel de la impresora.

**Tecla ON / OFF**  
Para encender/apagar (ON / OFF) la unidad.

**Tecla de selección de modo**  
Para seleccionar entre el modo de analizador de composición corporal y el modo de sólo peso.

**Tecla de puesta a cero**  
Para poner la báscula a cero.

**Tecla de ajuste de tara preestablecida (peso de la ropa)**  
Para establecer la tara (peso de la ropa)

**Tecla OPEN**  
Para abrir la tapa de la impresora.

**Teclas de selección de tipo corporal**  
Para seleccionar el tipo corporal.

**Teclas de selección de sexo masculino/femenino**  
Para seleccionar sexo masculino/femenino.

**Tecla Enter/Next**  
Para registrar la información introducida.

**Tecla CE**  
Para borrar/cancelar la información introducida.

**Tecla de punto decimal**  
Para introducir un punto decimal.

**Teclas numéricas**  
Para introducir valores numéricos.

**Tecla de configuración**  
Para ajustar la fecha y la hora, configurar la impresora, etc.

**Tecla de "kg / lb"**  
Unidad de cambio

## Conexión de enchufes

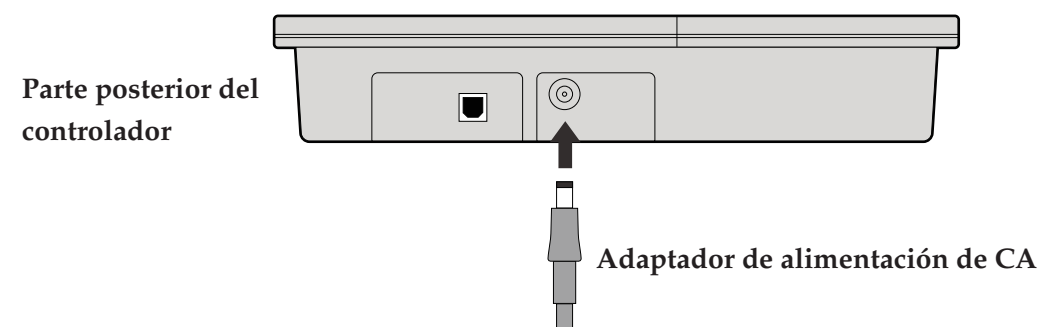

- ⚠ AVISO IMPORTANTE**
- Para evitar descargas eléctricas, no conecte o desconecte el enchufe con las manos húmedas.
  - Para evitar descargas eléctricas, no utilice este equipo cerca del agua.

- ⚠ PRECAUCIONES**
- Para evitar errores de medición, no realice mediciones mientras utiliza equipos que generan ondas de radio, como los teléfonos portátiles.
  - Use solamente el adaptador CA original (Modelo: SA25-0535U). Utilizar otros adaptadores diferentes del original puede alterar el funcionamiento o provocar humo o incendios.

- ⚠ PRECAUCIONES**
- Por favor, cambie el rollo de papel cuando aparezcan líneas rojas en los laterales del papel.
  - Por favor, preste especial atención para evitar lesionarse con el borde afilado.
  - Por favor, apague la máquina antes de eliminar atascos de papel.

## Instalación del rollo de papel en la impresora

### 1 Pulse **ON/OFF** para encender la unidad.

- Después de que se encienden todas las lámparas, aparece el número de modelo **331** y luego se visualiza **0.0**.

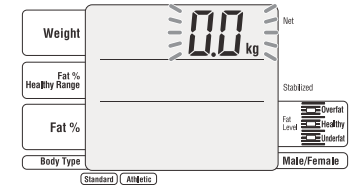

### 2 (1) Pulse **OPEN** (abrir). (2) Abra la tapa de la impresora.

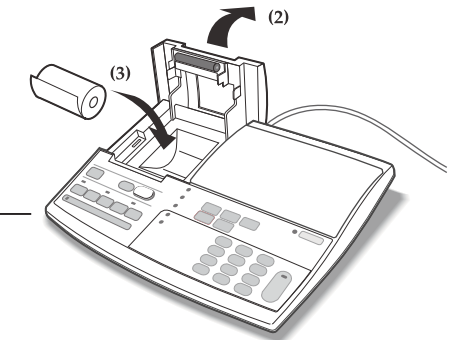

### 3 (3) Instale el rollo de papel en la impresora.

- Quite el adhesivo del rollo de papel y desenróllelo aproximadamente 10 cm.

### 4 Cierre la tapa de la impresora.

- Si se visualiza **COPE<sub>n</sub>**  
⇒ La tapa de la impresora está abierta; asegúrese de cerrarla correctamente (☞ página 173).

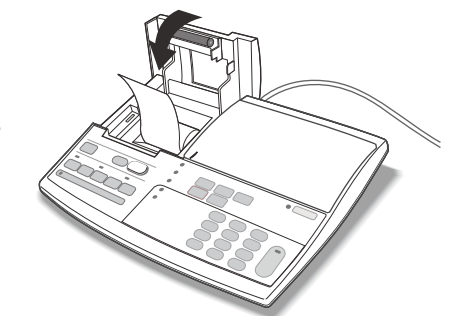

### 5 Pulse la tecla **FEED** (papel) y corte el exceso de papel.

- Si la opción de corte automático está ajustada a "OFF," el corte automático no se lleva a cabo (☞ página 140).

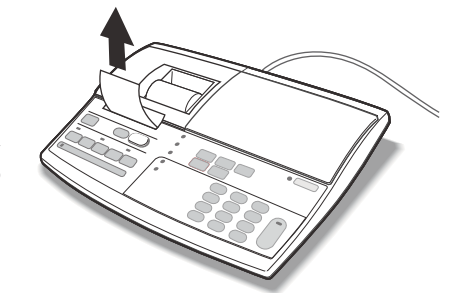

### 6 Instalación completa.

## Abra la pantalla de selección del ajuste.

### 1 Pulse **ON/OFF** para encender la unidad.

- Después de que se encienden todas las lámparas, aparece el número de modelo y luego se visualiza **00 kg**.



### 2 Pulse **Mode Setting**.

- Aparece la pantalla de introducción del ajuste.

#### Nota

- Los elementos 39 – 67 son los ajustes para imprimir (página 148).
- Una vez realizados todos los ajustes:
  - ⇒ Pulse **Mode Setting** en la pantalla “Selección del ajuste” (vuelve a aparecer la pantalla de introducción de tara).



#### Elementos de ajuste

|     |                                                                           |
|-----|---------------------------------------------------------------------------|
| 1   | Fecha y hora (página 138)                                                 |
| 2   | Cantidad de hojas a imprimir<br>Modo de composición corporal (página 140) |
| 3   | Cantidad de hojas a imprimir<br>Modo de sólo peso (página 139)            |
| 4   | Corte automático del papel de la impresora<br>(página 140)                |
| 5   | Señal audible (página 140)                                                |
| 6   | Visualización del margen de % de grasasaludable<br>(página 141)           |
| 7   | Núm. de ID (página 141)                                                   |
| 8   | Flujo de medición (página 142)                                            |
| 9   | Modo atlético (página 142)                                                |
| 10* | Introducción de unidad de estatura (página 143)                           |
| 11  | Tiempo de determinación automática (página 143)                           |
| 17  | Modalità Lottatore (página 144)                                           |
| 18  | Porcentaje objetivo de grasa corporal (página 145)                        |
| 19  | Seleccionar idioma (página 145)                                           |
| 20  | Preajuste de elementos a imprimir (página 146)                            |

\* Inválido:lb

#### Activación / desactivación de ajustes de impresión (página 146)

|    |                                       |
|----|---------------------------------------|
| 39 | Logotipo de TANITA                    |
| 40 | Nombre de categoría                   |
| 41 | Fecha                                 |
| 42 | Número de serie                       |
| 43 | Memoria                               |
| 44 | Núm. de ID                            |
| 45 | Masa de grasa                         |
| 46 | Masa libre de grasa                   |
| 47 | Masa muscular                         |
| 48 | Agua corporal total                   |
| 49 | % de agua corporal total              |
| 50 | Masa ósea                             |
| 51 | Tasa de metabolismo basal (TMB)       |
| 52 | Edad metabólica                       |
| 53 | Índice de grasa visceral              |
| 54 | IMC (índice de masa corporal)         |
| 56 | Peso corporal ideal                   |
| 57 | Grado de obesidad                     |
| 58 | Rango deseable de % de grasa corporal |
| 59 | Gráfico de % de grasa %               |
| 60 | Gráfico de IMC                        |
| 61 | Gráfico de índice de grasa visceral   |
| 62 | Gráfico de masa muscular              |
| 63 | Gráfico de TMB                        |
| 64 | Índice de físico                      |

#### Nota

- \* Al realizar diversos ajustes de forma continua,
  - ⇒ pulse cada número para registrarlo.
- \* La máquina retendrá la información introducida hasta la próxima vez que se modifique.

- \* Una vez realizados todos los ajustes:

⇒ Pulse **Mode Setting** en la pantalla “selección del ajuste” (vuelve a aparecer la pantalla de introducción de tara).

## Registre la fecha y la hora (viene de la página 136).

- 3** Pulse **1** y luego pulse **Enter / Next**.
- Aparece la pantalla de ajuste de “fecha y hora”.

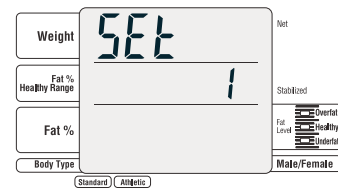

**4** Introduzca la fecha y la hora.

- Introduzca el año, mes, día, horas y minutos con 2 dígitos, en ese orden.

Ejemplo: Para introducir: 9:47 am, 21 de enero, 2009

0 9 0 1 2 1 0 9 4 7

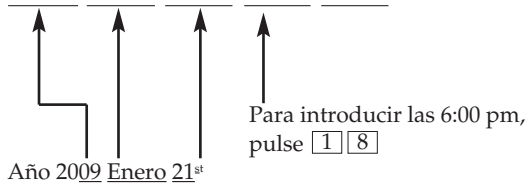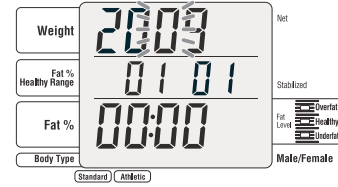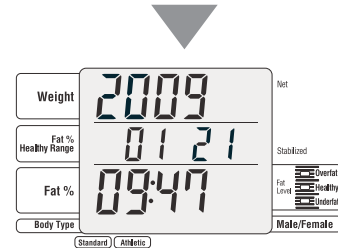

- Nota**
- Para introducir un número de 1 dígito (0 – 9), primero pulse **0**.
  - Para corregir el valor introducido o cancelar la entrada:
    - ⇒ pulse **CE** (se borra la información introducida).
  - Para dejar de introducir durante el proceso,
    - ⇒ pulse **Enter / Next**.

**5** Después de introducir todos los elementos, pulse **Enter / Next**.

- La máquina vuelve a mostrar la pantalla “selección del ajuste”.

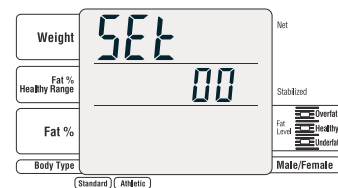

## Establezca el número de páginas a imprimir para el analizador de composición corporal (viene de la página 136).

- 3** Pulse **2** y luego pulse **Enter / Next**.
- Aparece la pantalla de ajuste del “número de hojas a imprimir para el monitor de composición corporal”.

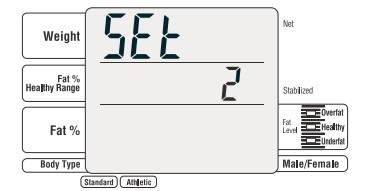

**4** Introduzca el número de hojas a imprimir.

- Nota**
- El ajuste predeterminado es “1” (margen de introducción: 0 – 3).
  - Si el número de hojas a imprimir se ajusta a “0” tanto para el monitor de composición corporal como para la báscula, la tecla **FEED** (papel) no funcionará.
  - Para corregir el valor introducido o cancelar la entrada:
    - ⇒ pulse **CE** (se borra la información introducida).

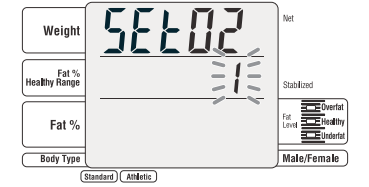

**5** Después de introducir el valor numérico, pulse **Enter / Next**.

- La máquina vuelve a mostrar la pantalla “selección del ajuste”.

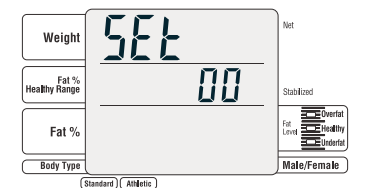

## Ajuste el número de hojas a imprimir para la báscula (viene de la página 136).

- 3** Pulse **3** y luego pulse **Enter / Next**.
- Aparece la pantalla de ajuste del “número de hojas a imprimir para la báscula”.

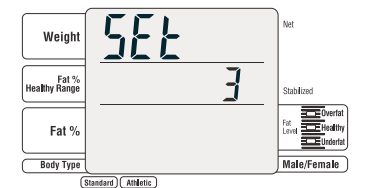

**4** Introduzca el número de hojas a imprimir.

- Nota**
- El ajuste predeterminado es “1” (margen de introducción: 0 – 3).
  - Si el número de hojas a imprimir se ajusta a “0” tanto para el monitor de composición corporal como para la báscula, la tecla **FEED** (papel) no funcionará.
  - Para corregir el valor introducido o cancelar la entrada:
    - ⇒ pulse **CE** (se borra la información introducida).

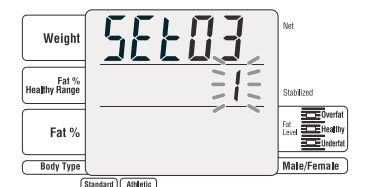

**5** Después de introducir el valor numérico, pulse **Enter / Next**.

- La máquina vuelve a mostrar la pantalla “selección del ajuste”.

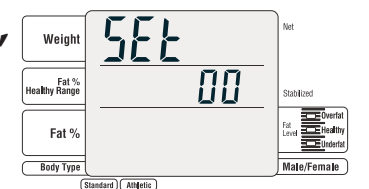

**Nota**

- \* Al realizar diversos ajustes de forma continua,
  - ⇒ pulse cada número para registrarlo.
- \* La máquina retendrá la información introducida hasta la próxima vez que se modifique.

\* Una vez realizados todos los ajustes:

- ⇒ Pulse **Mode Setting** en la pantalla “selección del ajuste” (vuelve a aparecer la pantalla de introducción de tara).

Antes de utilizar (Varios parámetros)

Antes de utilizar (Varios parámetros)



## Seleccione ON / OFF para la opción de corte automático del papel de la impresora (viene de la página 136).

**3** Pulse **4** y luego pulse **Enter / Next**.

- Aparece la pantalla de selección "corte automático ON / OFF."

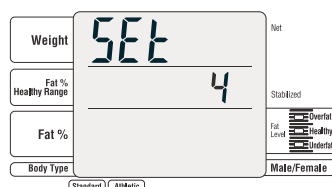

**4** Seleccione ON u OFF para la opción de corte automático.

- Nota**
- El ajuste predeterminado es "1.on." ("1. on" = válido, "0. off" = no válido)
  - Para corregir el valor introducido o cancelar la entrada: ⇨ pulse **CE** (se borra la información introducida).

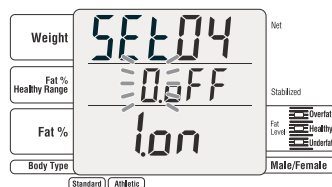

**5** Después de introducir el valor numérico, pulse **Enter / Next**.

- La máquina vuelve a mostrar la pantalla "selección del ajuste".

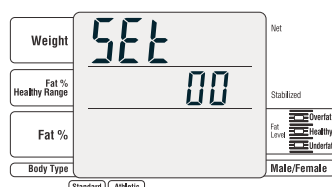

## Seleccione ON u OFF para la señal audible (viene de la página 136).

**3** Pulse **5** y luego pulse **Enter / Next**.

- Aparece la pantalla de selección "señal audible ON / OFF".

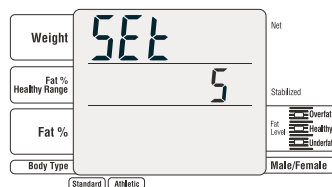

**4** Seleccione ON u OFF para la señal audible.

- Nota**
- El ajuste predeterminado es "1.on." ("1. on" = válido, "0. off" = no válido)
  - Para corregir el valor introducido o cancelar la entrada: ⇨ pulse **CE** (se borra la información introducida).

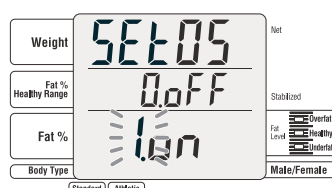

**5** Después de introducir el valor numérico, pulse **Enter / Next**.

- La máquina vuelve a mostrar la pantalla "selección del ajuste".

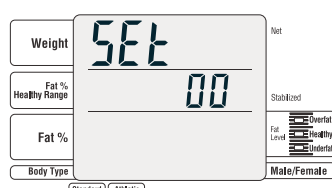

**Nota**

- \* Al realizar diversos ajustes de forma continua, ⇨ pulse cada número para registrarlo.
- \* La máquina retendrá la información introducida hasta la próxima vez que se modifique.

## Seleccione ON / OFF para la opción Visualización del margen de % de grasa saludable (viene de la página 136).

**3** Pulse **6** y luego pulse **Enter / Next**.

- Aparece la pantalla de selección "ON o OFF para la opción Visualización del margen de % de grasa saludable".

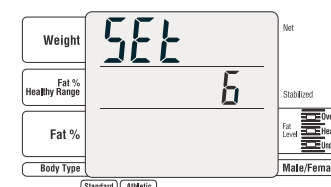

**4** Seleccione ON u OFF para la opción "Visualización del margen de % de grasa condición" al utilizar el analizador de composición corporal.

- Nota**
- El ajuste predeterminado es "1.on." ("1. on" = válido, "0. off" = no válido)
  - Para corregir el valor introducido o cancelar la entrada: ⇨ pulse **CE** (se borra la información introducida).

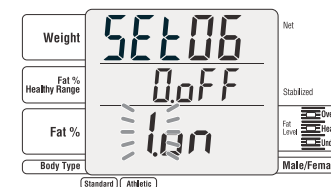

**5** Después de introducir el valor numérico, pulse **Enter / Next**.

- La máquina vuelve a mostrar la pantalla "selección del ajuste".

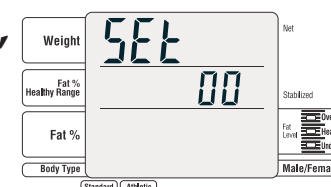

## Realice el ajuste con/sin un ID (viene de la página 136).

**3** Pulse **7** y luego pulse **Enter / Next**.

- Aparece la pantalla de ajuste "con o sin ID".

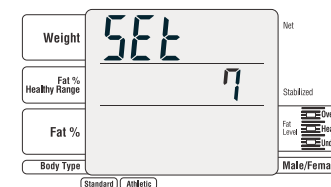

**4** Realice el ajuste con o sin un ID.

- Nota**
- El ajuste predeterminado es "0. off." ("1. on" = con ID, "0. off" = sin ID)
  - Para corregir el valor introducido o cancelar la entrada: ⇨ pulse **CE** (se borra la información introducida).

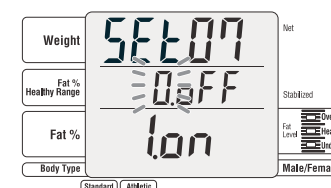

**5** Después de introducir el valor numérico, pulse **Enter / Next**.

- La máquina vuelve a mostrar la pantalla "selección del ajuste".

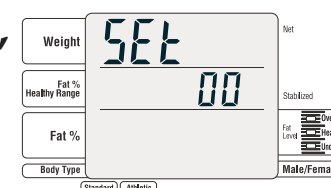

- \* Una vez realizados todos los ajustes:

⇨ Pulse **Mode Setting** en la pantalla "selección del ajuste" (vuelve a aparecer la pantalla de introducción de tara).

## Seleccione el flujo de medición (viene de la página 136).

### 3 Pulse **8** y luego pulse **Enter / Next**.

- Aparece la pantalla de selección "ON u OFF para el modo de un solo paso".

- Nota**
- El modo de un solo paso es  
⇒ un modo que se utiliza para medir el peso corporal después de introducir información personal.

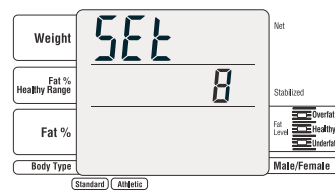

### 4 Seleccione ON u OFF para el modo de un solo paso al utilizar el analizador de composición corporal.

- Nota**
- El ajuste predeterminado es "0. off." ("1. on" = válido, "0. off" = no válido)
  - Para corregir el valor introducido o cancelar la entrada:  
⇒ pulse **CE** (se borra la información introducida).

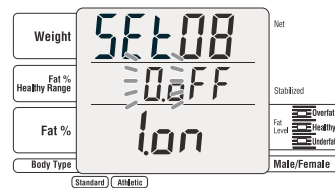

### 5 Después de introducir el valor numérico, pulse **Enter / Next**.

- La máquina vuelve a mostrar la pantalla "selección del ajuste".

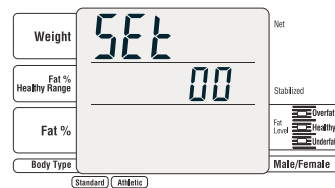

## Seleccione ON / OFF para la selección de modo atlético (viene de la página 136).

### 3 Pulse **9** y luego pulse **Enter / Next**.

- Aparece la pantalla de selección "Seleccione ON / OFF para la selección del modo atlético".

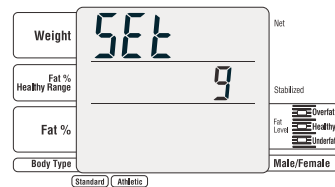

### 4 Seleccione ON u OFF para la selección de modo atlético al utilizar el analizador de composición corporal.

- Nota**
- El ajuste predeterminado es "1.on." ("1. on" = válido, "0. off" = no válido)
  - Para corregir el valor introducido o cancelar la entrada:  
⇒ pulse **CE** (se borra la información introducida).

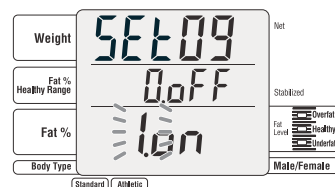

### 5 Después de introducir el valor numérico, pulse **Enter / Next**.

- La máquina vuelve a mostrar la pantalla "selección del ajuste".

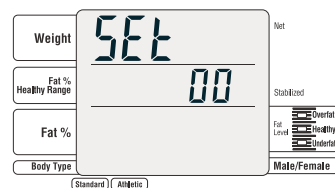

**Nota**

- \* Al realizar diversos ajustes de forma continua,  
⇒ pulse cada número para registrarlo.
- \* La máquina retendrá la información introducida hasta la próxima vez que se modifique.

## Seleccione la unidad de introducción de estatura (viene de la página 136).

### 3 Pulse **1 0** y luego pulse **Enter / Next**.

- Aparece la pantalla de selección "introduzca unidad de peso".
- \* Inválido: lb

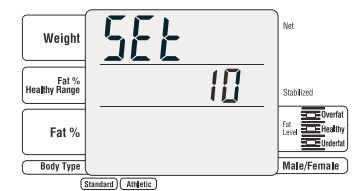

### 4 Seleccione la unidad de introducción de estatura.

- Nota**
- El ajuste predeterminado es "0. off."  
0. off: establece una unidad de introducción de estatura de 0,1 cm  
1. on: establece una unidad de introducción de estatura de 1 cm
  - Para corregir el valor introducido o cancelar la entrada:  
⇒ pulse **CE** (se borra la información introducida).

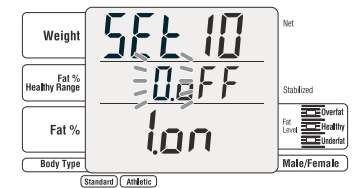

### 5 Después de introducir el valor numérico, pulse **Enter / Next**.

- La máquina vuelve a mostrar la pantalla "selección del ajuste".

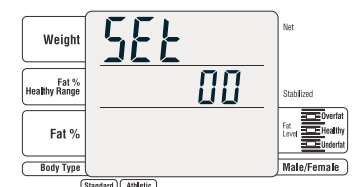

## Establezca el tiempo de determinación automática durante la introducción de información (viene de la página 136).

### 3 Pulse **1 1** y luego pulse **Enter / Next**.

- Aparece la pantalla de selección "tiempo de determinación automática durante la introducción de información".

- Nota**
- La función de determinación automática durante la introducción de información es:  
⇒ una función que determina automáticamente el valor introducido, incluso si no se pulsa de manera inmediata **Enter / Next**, después de introducir un valor numérico.

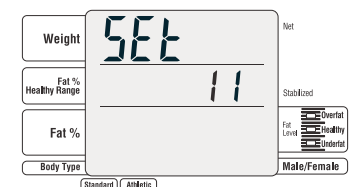

### 4 Establezca el tiempo de determinación automática durante la introducción de información.

- Nota**
- El ajuste predeterminado es 5 segundos ("5"). (margen de introducción: 0 - 9).  
\*Si se selecciona "0", los valores no se determinan automáticamente.
  - Para corregir el valor introducido o cancelar la entrada:  
⇒ pulse **CE** (se borra la información introducida).

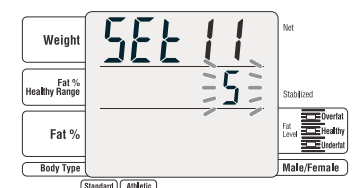

### 5 Después de introducir el valor numérico, pulse **Enter / Next**.

- La máquina vuelve a mostrar la pantalla "selección del ajuste".

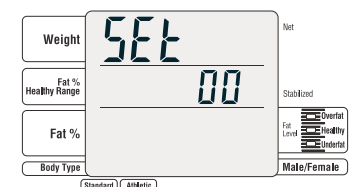

- \* Una vez realizados todos los ajustes:

⇒ Pulse **Mode Setting** en la pantalla "selección del ajuste" (vuelve a aparecer la pantalla de introducción de tara).

## Establecimiento del modo de luchador (viene de la página 136).

**3** Pulse **1** **7** y luego pulse **Enter / Next**.

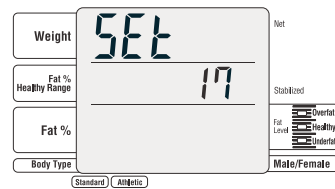

## 4 Establecimiento del modo de luchador

**Nota**

- El valor predeterminado es 0.off
- 0: el modo esta desactivado
- 5: Establecimiento del 5% en el modo de luchador
- 7: Establecimiento del 7% en el modo de luchador
- Lorsque vous activez le "mode Lutteur", la TBF-300A calcule automatiquement le poids minimum du lutteur pour un pourcentage de masse grasse minimum prédéterminé. La prise de position de 1996, de l'ACSM, intitulée "Perte de poids chez les lutteurs", adoptée par la NCAA, recommande les pourcentages de masse grasse MINIMUMS suivants:

5% for Collegiate Athletes (male)

7% for High School Athletes (male)

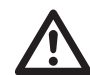

L'objectif de pourcentage de masse grasse est complètement indépendant des calculs du poids de lutte minimum (POIDS min).

**Exemple :**

Vous pouvez régler l'objectif de pourcentage de masse grasse sur 15%, même si le POIDS min est calculé pour une masse grasse minimum prédéterminée de 5 ou de 7%.

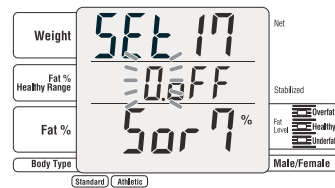

**5** Después de introducir el valor numérico, pulse **Enter / Next**.

- La máquina vuelve a mostrar la pantalla "selección del ajuste".

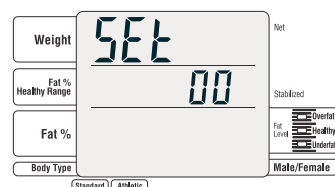

## Seleccione ON /OFF de la ratio de grasa corporal objetivo (viene de la página 136).

**3** Pulse **1** **8** y luego pulse **Enter / Next**.

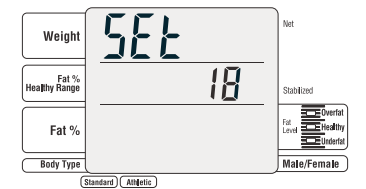

**4** Seleccione ON u OFF de la ratio de grasa corporal objetivo

**Nota**

- El valor por defecto es "0.off" ("1.on" para válido, "0.off" para inválido)
- Para corregir el valor introducido o cancelar la entrada: ⇒ pulse **CE** (se borra la información introducida).

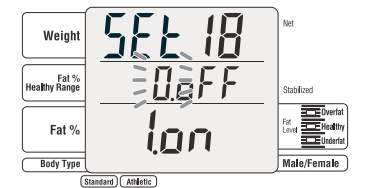

**5** Después de introducir el valor numérico, pulse **Enter / Next**.

- La máquina vuelve a mostrar la pantalla "selección del ajuste".

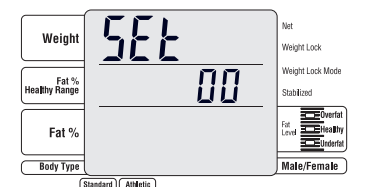

## Determine el lenguaje de impresión (viene de la página 136).

**3** Pulse **1** **9** y luego pulse **Enter / Next**.

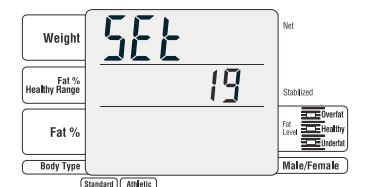

**4** Determine el lenguaje de impresión

**Nota**

- 1. Inglés 2. Francés 3. Alemán 4. Italiano 5. Español 6. Holandés
- Para corregir el valor introducido o cancelar la entrada: ⇒ pulse **CE** (se borra la información introducida).

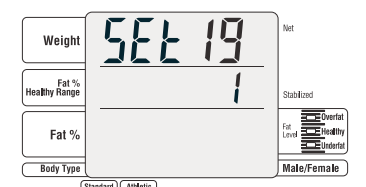

**5** Después de introducir el valor numérico, pulse **Enter / Next**.

- La máquina vuelve a mostrar la pantalla "selección del ajuste".

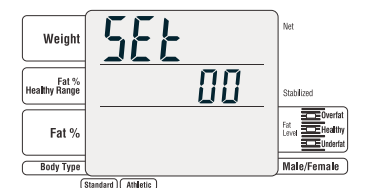

**Nota**

- \* Al realizar diversos ajustes de forma continua, ⇒ pulse cada número para registrarlo.
- \* La máquina retendrá la información introducida hasta la próxima vez que se modifique.

\*Una vez realizados todos los ajustes:

⇒ Pulse **Mode Setting** en la pantalla "selección del ajuste" (vuelve a aparecer la pantalla de introducción de tara).

Establezca el preajuste de elementos a imprimir (viene de la página 234).

**3** Pulse **2** **0** y luego pulse **Enter / Next**.

- Aparece la pantalla de selección "print out preset".

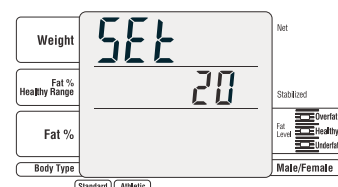

**4** Establezca el preajuste de elementos a imprimir.

- Realice el ajuste con **1** - **3**.

**Nota**

- La función de preajuste de elementos a imprimir es una función que permite ajustar los elementos de impresión del patrón 1 - 3 a ON automáticamente (página 147). El ajuste predeterminado es "1" (patrón 1).
- Cuando se cambia el ajuste ON u OFF de los elementos de impresión con "selección de los elementos de impresión" después de preestablecer los elementos a imprimir (página 150), el último estado establecido es válido.

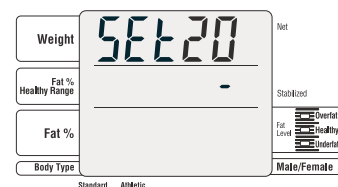

**5** Después de introducir el valor numérico, pulse **Enter / Next**.

- La máquina vuelve a mostrar la pantalla "selección del ajuste".

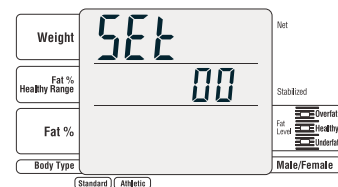

[Lista de elementos de impresión]

| Elemento de impresión                 | Monitor de composición de estructura corporal |          |      |            |          |      |            |          |      | Báscula |
|---------------------------------------|-----------------------------------------------|----------|------|------------|----------|------|------------|----------|------|---------|
|                                       | 1 Modelo 1                                    |          |      | 2 Modelo 2 |          |      | 3 Modelo 3 |          |      |         |
|                                       | Normal                                        | Atlético | Niño | Normal     | Atlético | Niño | Normal     | Atlético | Niño |         |
| Tipo de estructura corporal           |                                               |          |      |            |          |      |            |          |      | ✓       |
| Logotipo de TANITA                    |                                               |          |      |            |          |      |            |          |      | ✓       |
| Nombre de categoría                   |                                               |          |      |            |          |      |            |          |      |         |
| Fecha                                 |                                               |          |      |            |          |      |            |          |      |         |
| Número de serie                       |                                               |          |      |            |          |      |            |          |      |         |
| Memoria                               |                                               |          |      |            |          |      |            |          |      | ✓       |
| Núm. de ID                            |                                               |          |      |            |          |      |            |          |      |         |
| Masa de grasa                         |                                               |          |      |            |          |      |            |          |      |         |
| Masa libre de grasa                   |                                               |          |      |            |          |      |            |          |      |         |
| Masa muscular                         |                                               |          |      |            |          |      |            |          |      |         |
| Agua corporal total                   |                                               |          |      |            |          |      |            |          |      |         |
| % de agua corporal total              |                                               |          |      |            |          |      |            |          |      |         |
| Masa ósea                             |                                               |          |      |            |          |      |            |          |      |         |
| Tasa de metabolismo basal (TMB)       |                                               |          |      |            |          |      |            |          |      |         |
| Edad metabólica                       |                                               |          |      |            |          |      |            |          |      |         |
| Índice de grasa visceral              |                                               |          |      |            |          |      |            |          |      |         |
| IMC (índice de masa corporal)         |                                               |          |      |            |          |      |            |          |      |         |
| Peso corporal ideal                   |                                               |          |      |            |          |      |            |          |      |         |
| Grado de obesidad                     |                                               |          |      |            |          |      |            |          |      |         |
| Rango deseable de % de grasa corporal |                                               |          |      |            |          |      |            |          |      |         |
| Mode Lutteur                          |                                               |          |      |            |          |      |            |          |      |         |
| Gráfico de % de grasa %               |                                               |          |      |            |          |      |            |          |      |         |
| Gráfico de IMC                        |                                               |          |      |            |          |      |            |          |      |         |
| Gráfico de índice de grasa visceral   |                                               |          |      |            |          |      |            |          |      |         |
| Gráfico de masa muscular              |                                               |          |      |            |          |      |            |          |      |         |
| Gráfico de TMB                        |                                               |          |      |            |          |      |            |          |      |         |
| Índice de físico                      |                                               |          |      |            |          |      |            |          |      |         |

- Los elementos marcados con "✓" se imprimen.
- Se pueden seleccionar los elementos marcados con para imprimirlos (página 148)
- \* Para ver un ejemplo de impresión de elementos preestablecidos, consulte la página 148.

**Nota**

- \* Al realizar diversos ajustes de forma continua, pulse cada número para registrarlo.
- \* La máquina retendrá la información introducida hasta la próxima vez que se modifique.

\*Una vez realizados todos los ajustes:

- ⇒ Pulse **Mode Setting** en la pantalla "selección del ajuste" (vuelve a aparecer la pantalla de introducción de tara).



# Varios parámetros (Métodos de ajuste (continuación))

[Al seleccionar el patrón de elementos de impresión "1"]

**TANITA**  
BODY COMPOSITION ANALYZER SC-331S  
OCT/14/2009 18:21  
SERIAL No. 00000002

**INPUT**  
ID No. 000000123  
BODY TYPE STANDARD  
GENDER MALE  
AGE 36  
HEIGHT 170.4cm  
CLOTHES WEIGHT 1.0kg

**RESULT**  
WEIGHT 64.4kg  
FAT % 13.9 %  
FAT MASS 9.0kg  
FFM 55.4kg  
MUSCLE MASS 52.6kg  
TBW 39.2kg  
TBW % 60.9 %  
BONE MASS 2.8kg  
BMR 6678 kJ  
1596kcal  
METABOLIC AGE 21  
VISCERAL FAT RATING 4  
BMI 22.2  
IDEAL BODY WEIGHT 63.9kg  
DEGREE OF OBESITY 0.8 %

**DESIRABLE RANGE**  
FAT % 8.0-19.9 %  
FAT MASS 4.8-13.8kg

**Target**  
TARGET BF% is: 10 %  
Predicted weight: 61.6kg  
Predicted fat mass: 6.2kg  
FAT TO LOSE: 2.8kg  
Consult your physician before beginning any weight management program. Tanita is not responsible for determining your targetBF%.

**INDICATOR**  
\*FAT %  
- | 0 | + | ++  
\*BMI  
- | 0 | + | ++  
\*VISCERAL FAT RATING  
| 13  
\*MUSCLE MASS  
- | 0 | +  
\*BMR  
- | 0 | +  
\*PHYSIQUE RATING  
STANDARD  
\*IMPEDANCE 481.2 Ω

Nombre de categoría

**Peso**  
• Peso corporal medido.

**Masa Grasa**  
• Peso total de la masa de grasa contenida en el cuerpo.

**Masa Muscular**  
• Masa muscular magra libre de hueso (LTM)

**% Agua Total**

**MB\***  
• El Índice de metabolismo basal representa la cantidad total de energía gastada por el cuerpo para mantener las funciones normales en reposo como la respiración y la circulación.

**Nivel de Grasa Visceral\***  
• El nivel de grasa visceral indica la cantidad de grasa visceral.

**Peso Ideale\***  
• El peso corporal ideal es un valor para el cual el IMC es 22.

**Grado de Obesidad\***  
• Se calcula como (peso) - (peso estándar) / (peso estándar) × 100.

**Impedancia**  
• Impedancia (No tiene efecto sobre la evaluación de los resultados de medición).

**Logotipo**

**Número de Serie**  
• La selección por defecto es 00000001. Añade 1 por cada medición que realiza.

**ID**  
• Cuando se introduce con un Identificador de usuario, éste se imprime. (Por defecto se imprime sin ID).

**Masa Grasa %**  
• El porcentaje de grasa es la grasa corporal en proporción con el peso corporal.

**Masa Magra**  
• La masa libre de grasa se compone de músculo, huesos, tejido, agua y otras masas libres de grasa en el cuerpo.

**Agua Total**  
• El agua corporal total es la cantidad de agua retenida en el cuerpo. Se dice que el ACT corresponde a aproximadamente el 50% - 70% del peso corporal total. Generalmente, los hombres tienden a tener un mayor peso de agua que las mujeres debido a que poseen una mayor masa muscular.

**Masa Ósea\***  
• La cantidad de mineral óseo contenida en el hueso completo.

**Edad Metabólica\***  
• Se considera que la edad metabólica es baja (joven) cuando la masa muscular es grande y la TMB es elevada.

**BMI**  
• Se calcula con la fórmula "peso (kg) / altura (m)<sup>2</sup>"  
• Ámbito deseable 18,5 - 24,9

\* El valor estándar es para el modo Estándar. En el caso del modo Atlético, el valor estándar es sólo una referencia. Y para los menores de 17 años, sólo se muestra como valor estándar el porcentaje de grasa corporal. La masa muscular, la cantidad total de agua en el organismo y la masa ósea estimada para los menores de 17 años son sólo valores de referencia.

\*18 - 99 años

[Al seleccionar el patrón de elementos de impresión "2"]

**TANITA**  
BODY COMPOSITION ANALYZER SC-331S  
OCT/14/2009 18:22  
SERIAL No. 00000003

**INPUT**  
ID No. 000000123  
BODY TYPE STANDARD  
GENDER MALE  
AGE 36  
HEIGHT 170.4cm  
CLOTHES WEIGHT 1.0kg

**RESULT**  
WEIGHT 64.4kg  
FAT % 13.7 %  
FAT MASS 8.8kg  
FFM 55.6kg  
MUSCLE MASS 52.8kg  
TBW 39.5kg  
TBW % 61.3 %  
BONE MASS 2.8kg  
BMR 6699 kJ  
1601kcal  
METABOLIC AGE 21  
VISCERAL FAT RATING 4  
BMI 22.2  
IDEAL BODY WEIGHT 63.9kg  
DEGREE OF OBESITY 0.8 %

**Target**  
TARGET BF% is: 10 %  
Predicted weight: 61.8kg  
Predicted fat mass: 6.2kg  
FAT TO LOSE: 2.6kg  
Consult your physician before beginning any weight management program. Tanita is not responsible for determining your targetBF%.

**INDICATOR**  
\*FAT %  
- | 0 | + | ++  
\*BMI  
- | 0 | + | ++  
\*IMPEDANCE 473.0 Ω

[Al seleccionar el patrón de elementos de impresión "3"]

**TANITA**  
BODY COMPOSITION ANALYZER SC-331S  
OCT/14/2009 18:23  
SERIAL No. 00000004

**INPUT**  
ID No. 000000123  
BODY TYPE STANDARD  
GENDER MALE  
AGE 36  
HEIGHT 170.4cm  
CLOTHES WEIGHT 1.0kg

**RESULT**  
WEIGHT 64.4kg  
FAT % 13.8 %  
BMI 22.2

**Target**  
TARGET BF% is: 10 %  
Predicted weight: 61.7kg  
Predicted fat mass: 6.2kg  
FAT TO LOSE: 2.7kg  
Consult your physician before beginning any weight management program. Tanita is not responsible for determining your targetBF%.

\*IMPEDANCE 478.2 Ω

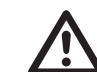

Consulte a su médico antes de comenzar cualquier programa de control de peso. Tanita no se hace responsable de la determinación del objetivo de proporción de grasa corporal.

Consulte a su médico antes de comenzar cualquier programa de control de peso. Tanita no se hace responsable de la determinación del objetivo de proporción de grasa corporal.

Antes de utilizar (Varios parámetros)

Antes de utilizar (Varios parámetros)

Cuando se selecciona la activación del ajuste del logotipo (viene de la página 136).

**3** Seleccione el número que desea introducir con las teclas numéricas ( **3** **9** **6** **4** ) y, a continuación, pulse **Enter / Next**.

- Aparece la pantalla de ajuste.

**Nota**

- Consulte la página siguiente para obtener información sobre el número de ajuste de cada elemento.
- Cuando se selecciona impresión de elementos preestablecidos, después de establecer los elementos a imprimir (☞ página 148), los elementos a imprimir pueden cambiarse automáticamente. Compruebe la "Lista de elementos de impresión" (☞ página 147).

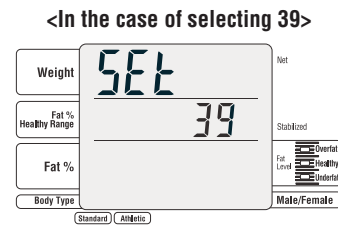

Impresión de la configuración de elementos ON / OFF

|    |                                 |
|----|---------------------------------|
| 39 | Logotipo de TANITA              |
| 40 | Nombre de categoría             |
| 41 | Fecha                           |
| 42 | Número de serie                 |
| 43 | Memoria                         |
| 44 | Núm. de ID                      |
| 45 | Masa de grasa                   |
| 46 | Masa libre de grasa             |
| 47 | Masa muscular                   |
| 48 | Agua corporal total             |
| 49 | % de agua corporal total        |
| 50 | Masa ósea                       |
| 51 | Tasa de metabolismo basal (TMB) |

|    |                                       |
|----|---------------------------------------|
| 52 | Edad metabólica                       |
| 53 | Índice de grasa visceral              |
| 54 | IMC (índice de masa corporal)         |
| 56 | Peso corporal ideal                   |
| 57 | Grado de obesidad                     |
| 58 | Rango deseable de % de grasa corporal |
| 59 | Gráfico de % de grasa %               |
| 60 | Gráfico de IMC                        |
| 61 | Gráfico de índice de grasa visceral   |
| 62 | Gráfico de masa muscular              |
| 63 | Gráfico de TMB                        |
| 64 | Índice de físico                      |

**4** Seleccione ON u OFF para el elemento a imprimir.

**Nota**

- "0. off" = no se imprime, "1. on" = se imprime.
- Para corregir el valor introducido o cancelar la entrada:
  - ☞ pulse **CE** (se borra la información introducida).

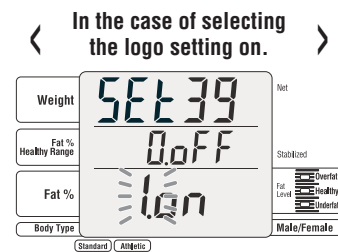

**5** Después de introducir el valor numérico, pulse **Enter / Next**.

- La máquina vuelve a mostrar la pantalla "selección del ajuste".

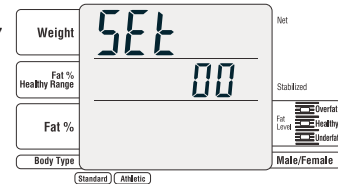

**Nota**

- \* Al realizar diversos ajustes de forma continua,
  - ☞ pulse cada número para registrarlo.
- \* La máquina retendrá la información introducida hasta la próxima vez que se modifique.

\* Una vez realizados todos los ajustes:

- ☞ Pulse **Mode Setting** en la pantalla "selección del ajuste" (vuelve a aparecer la pantalla de introducción de tara).

Antes de utilizar (Varios parámetros)

Antes de utilizar (Varios parámetros)

**!** Explica el procedimiento cuando la impresora está encendida. Observe que el display puede ser diferente si el número de impresiones se configura en **0**.

- !** No limpie el equipo con productos químicos corrosivos (gasolina, limpiadores, etc). Utilice un detergente neutro para limpiarlo.
- Cuando se haya trasladado el equipo a un lugar con una diferencia de temperatura de 20°C o más, espere al menos dos horas antes de utilizarlo.
- Al tomar medidas, mantenga alejada de la unidad a cualquier persona que utilice transmisores como teléfonos móviles a fin de evitar causar errores de margen.

## Acerca de la selección de tipo de cuerpo atlético

- Se recomienda que las personas mayores de 18 años y que cumplan los siguientes requisitos seleccionen el "modo atlético" y lo utilicen como valores de referencia.
  - Personas que realizan al menos 12 horas de ejercicio físico por semana.
  - Personas que pertenecen a un equipo u organización deportiva con el fin de participar en competiciones, etc.
  - Personas que practican fisicoculturismo.
  - Atletas profesionales.

### Atención

- Postura durante la medición
  - Párese con ambos pies paralelos sobre los electrodos.
  - Párese derecho sin doblar las rodillas.
- El margen de introducción de edad es de 5 a 99 años. En el caso de personas mayores de 100 años, introduzca 99.

### Nota

- La impedancia, que es la base para el cálculo de la composición corporal, varía considerablemente inmediatamente después de realizar ejercicios intensos, por lo que puede no ser medida de forma correcta.
- Si se selecciona "atlético" para tipo corporal, la selección cambia automáticamente a "estándar" en el caso de personas de 17 años o menores.
- Cuando se introduce el peso de la ropa, éste se resta del peso obtenido durante la medición.

## Cuando se selecciona flujo estándar (no el modo de un solo paso)

En el modo de flujo estándar, primero se mide el peso, luego se introducen los datos personales y, finalmente, se mide la composición corporal.

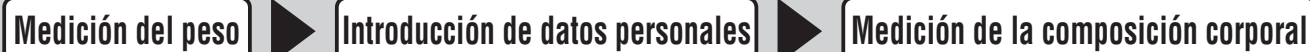

**1** Pulse **ON/OFF** para encender la unidad.

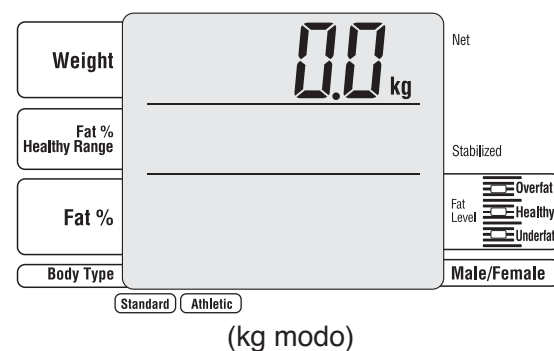

**2** Compruebe que el monitor de composición corporal está seleccionado e introduzca el peso de la ropa.

Introduzca la información pulsando **0** - **9** y **.**

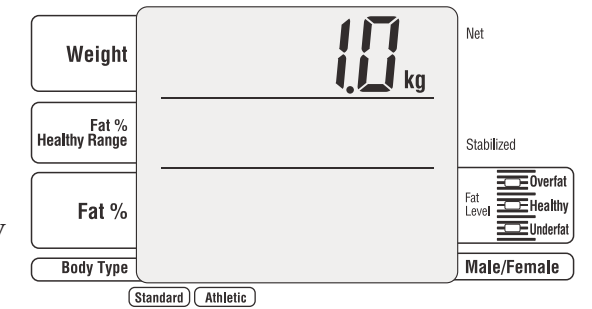

### Nota

- El peso de la ropa (tara preestablecida) puede introducirse dentro del margen de 0,0-20,0lb o 0,0-10,0kg.
  - \*incrementos de 0,2lb / 0,1kg
  - \*Unidad se cambia por **kg / lb** clave.
- Para corregir el valor introducido:
  - ⇒ pulse **CE** (se borra la información introducida).

**3** Pulse **Enter / Next**.

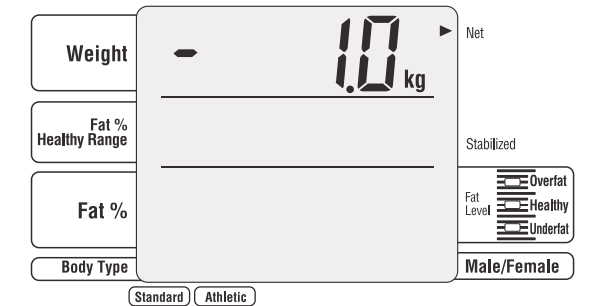

### Nota

- Esta pantalla no aparece si se ha seleccionado OFF en "con o sin ID" (ver página 141). (Aparece la pantalla "selección del tipo corporal")

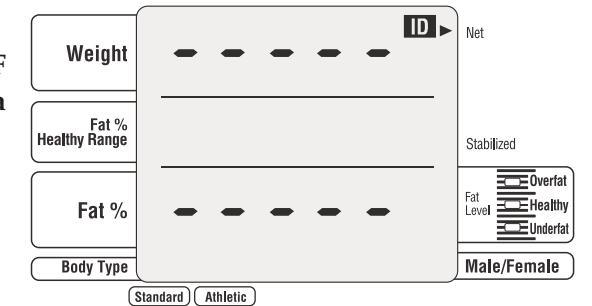

**4** Introduzca el número de ID.

Introdúzcalo pulsando **0** - **9**.

### Nota

- Esta pantalla no aparece si se ha seleccionado OFF en "con o sin ID" (ver página 141).
- El número de ID puede introducirse dentro del margen de 0 a 999999999. Si se pulsa **Enter / Next**, los dígitos no introducidos se rellenan con ceros.
- Si ha introducido información incorrecta:
  - ⇒ pulse **CE** (se borra la información introducida).
- Si se pulsa **CE** sin haber introducido un número de ID, la máquina vuelve a mostrar la pantalla "inicio de medición".

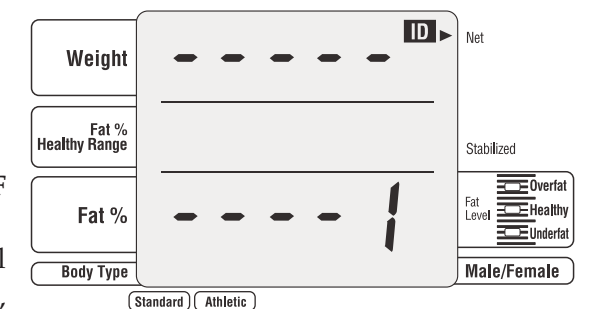

## 5 Seleccione el tipo corporal.

Pulse las teclas de selección de tipo corporal para introducir la información. Cuando se selecciona el tipo corporal, la lámpara parpadea en "Gender" (sexo).

### Nota

- Esta pantalla no aparece si se ha seleccionado OFF en "ON u OFF para el modo atlético" (página 142).
- El tipo corporal también puede seleccionarse con las teclas numéricas (1 2).
- Si ha introducido información incorrecta:
  - ⇒ pulse **CE** (se borra la información introducida y la máquina vuelve a mostrar la pantalla "selección de tipo corporal").
- Si se pulsa **CE** (borrar) sin haber introducido el tipo corporal, la máquina vuelve a mostrar la pantalla "introducción de número de ID" (o la pantalla "inicio de medición").



## 6 Seleccione el sexo.

Pulse las teclas de selección de sexo masculino / femenino para introducir la información. Cuando se selecciona masculino o femenino, la lámpara parpadea en "age input" (introducción de edad).

### Nota

- Si ha introducido información incorrecta:
  - ⇒ pulse **CE** (se borra la información introducida y la máquina vuelve a mostrar la pantalla "selección de sexo").
- Si se pulsa **CE** sin haber seleccionado sexo masculino o femenino, la máquina vuelve a mostrar la pantalla "selección de tipo corporal".

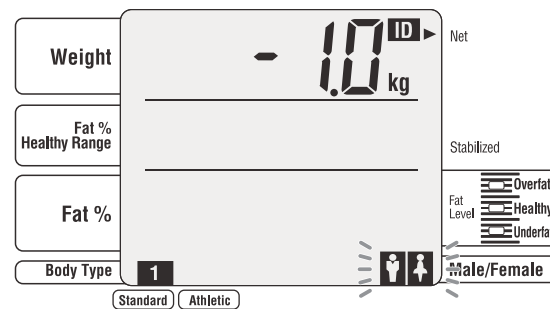

## 7 Introduzca la edad.

Introdúzcala pulsando 0 - 9.

### Nota

- La edad puede introducirse dentro del margen de 5 a 99.
- Si ha introducido información incorrecta:
  - ⇒ pulse **CE** (se borra la información introducida).
- Si se pulsa **CE** sin haber introducido la edad, la máquina vuelve a mostrar la pantalla "selección de sexo masculino/femenino".

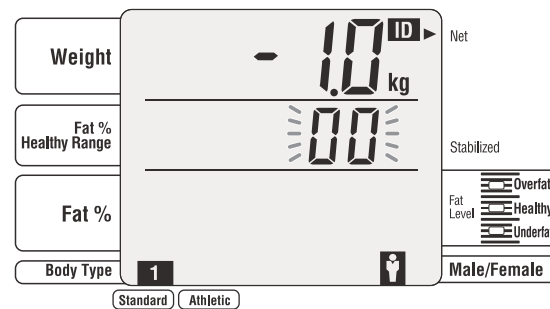

## 8 Pulse **Enter / Next**.

Cuando se introduce la edad, la lámpara parpadea en "height input" (introducción de estatura).

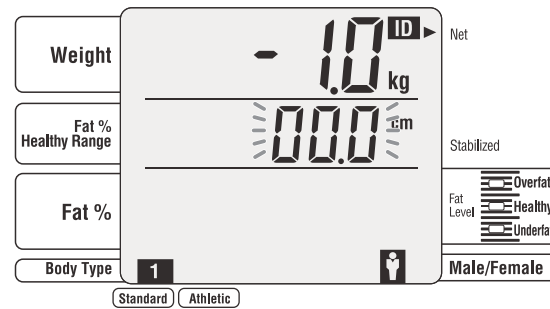

## 9 Introduzca la estatura.

Introdúzcala pulsando 0 - 9.

### Nota

- La estatura puede introducirse dentro del margen de 3ft -7ft11,5in /90,0 a 249,9 (90 a 249).
  - \*Unidad se cambia por **kg / lb** clave.
- Si ha introducido información incorrecta:
  - ⇒ pulse **CE** (se borra la información introducida).
- Si se pulsa **CE** sin haber introducido la estatura, la máquina vuelve a mostrar la pantalla "selección de edad".

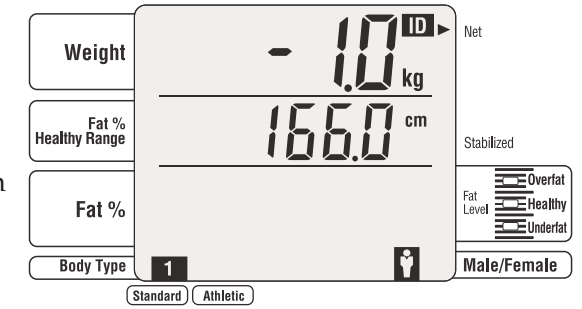

## 10 Pulse **Enter / Next**.

La lámpara "step on" (suba a la plataforma) parpadea.

### Nota

- Cuando se pulsa **CE**, la máquina vuelve a mostrar la pantalla anterior.

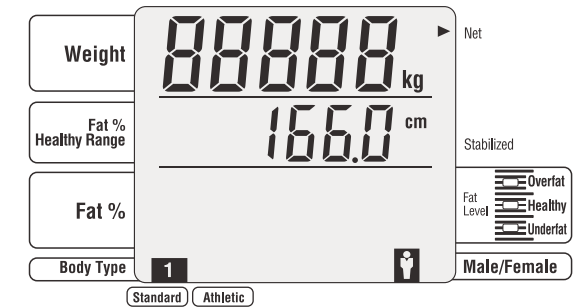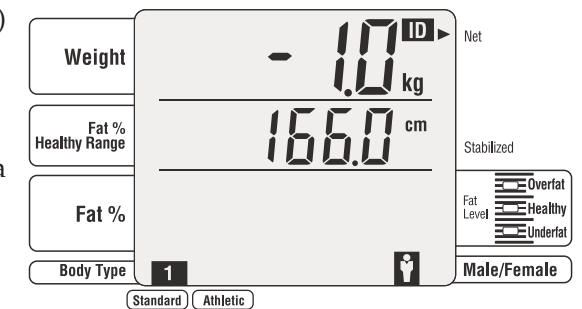

## 11 Step on the electrodes with bare feet.

Take off your socks and stockings before stepping on.

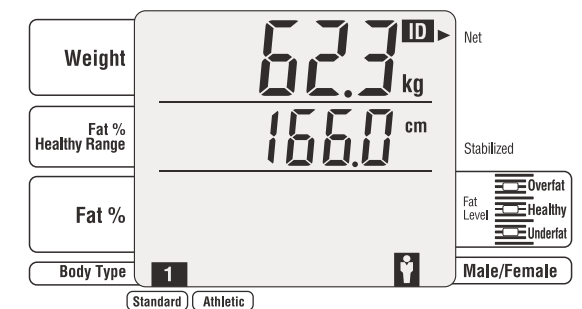

## 12 Se realiza la medición de la composición corporal.

La indicación **88888** se apaga de forma secuencial.

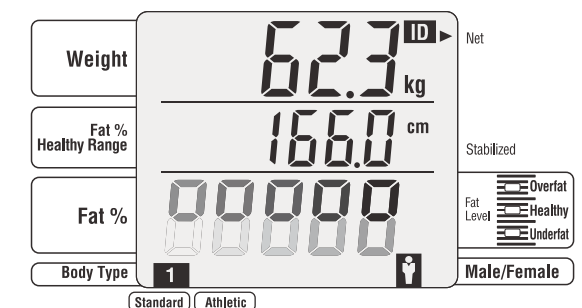



## 13 La medición finaliza.

Se visualiza el resultado de la medición y la estimación del porcentaje de grasa corporal. La información se imprime automáticamente. (Si se ha introducido un número distinto de 0 en "Selección del número de hojas a imprimir" (página 139).

### Nota

- Margen de grasa saludable (el valor numérico en la etapa intermedia) no se visualiza si se ha seleccionado OFF en "ON / OFF para Visualización del margen de % de grasa saludable" (página 141).

Baje de la plataforma.

La máquina vuelve a mostrar la pantalla "inicio de medición".

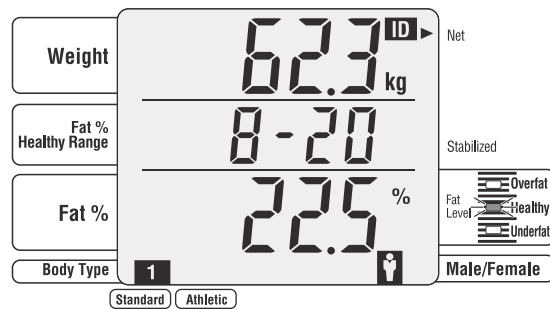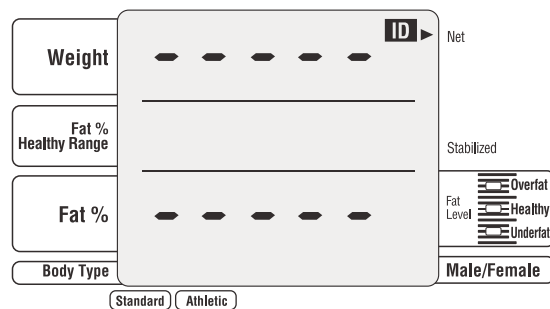

**Cómo leer la información de la pantalla <kg modo>**

Evaluación basada en el porcentaje de grasa corporal. (página 166.)

**Cómo leer la información de la pantalla <lb modo>**

Evaluación basada en el porcentaje de grasa corporal. (página 166.)

## Alternativa (no el modo de un solo paso)

En el modo de un solo paso, después de introducir los datos personales, se mide el peso y la composición corporal.

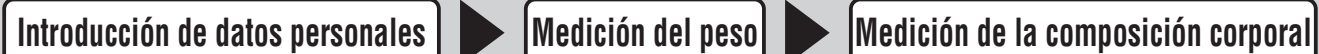

## 1 Pulse ON/OFF para encender la unidad.

### Nota

- Unidad se cambia por **kg / lb** clave.

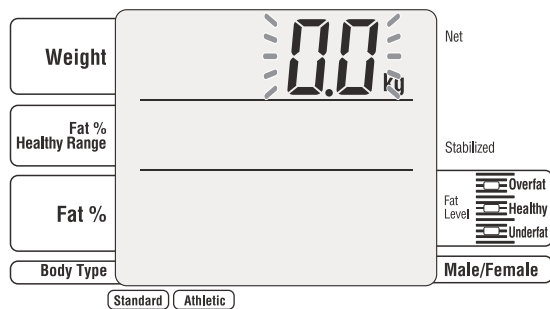

(kg modo)

## 2 Compruebe que el monitor de composición corporal está seleccionado e introduzca el peso de la ropa.

Introduzca la información pulsando **0** - **9** y **.**

### Nota

- El peso de la ropa (tara preestablecida) puede introducirse dentro del margen de 0,0-20,0lb o 0,0-10,0kg.  
\*incrementos de 0,2lb / 0,1kg  
\*Unidad se cambia por **kg / lb** clave.
- Para corregir el valor introducido:  
⇒ pulse **CE** (se borra la información introducida).

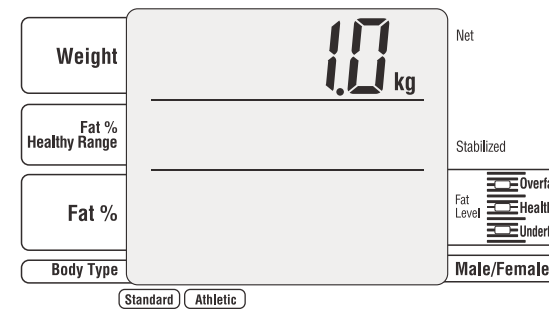

## 3 Pulse Enter / Next.

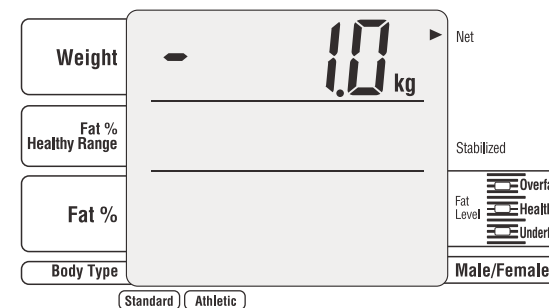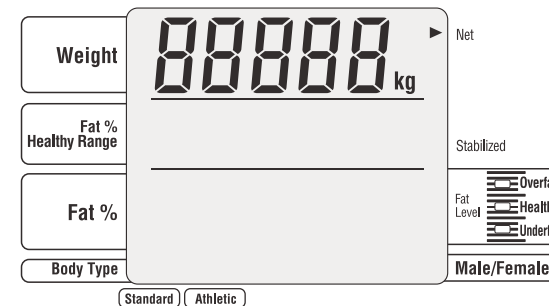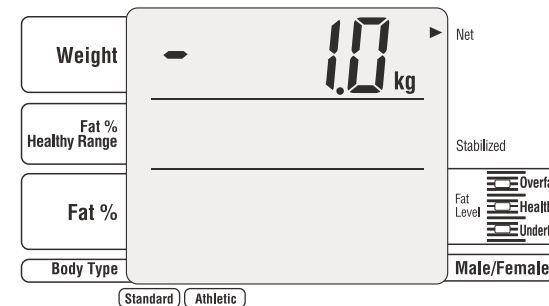

La lámpara "step on" (suba a la plataforma) parpadea.

### Nota

- Cuando se pulsa **CE**, la máquina vuelve a mostrar la pantalla anterior.



## 4 Pise los electrodos con los pies descalzos.

Quítese los calcetines o medias antes de pisar la báscula.

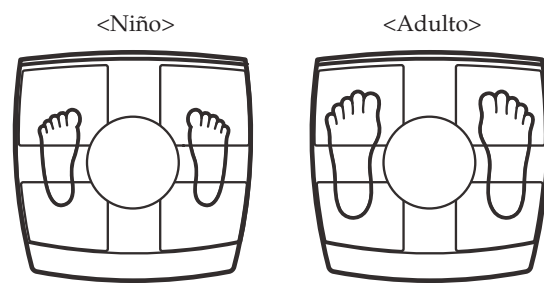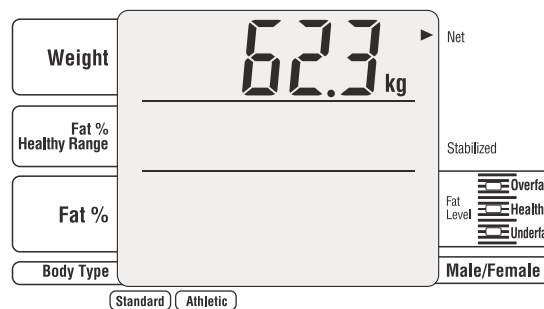

Cuando el peso se estabiliza, la máquina cambia a la pantalla que se muestra a la derecha.

### Nota

- No se baje de la plataforma.
- Esta pantalla no aparece si se ha seleccionado OFF en "con o sin ID" (página 141). (Aparece la pantalla "selección del tipo corporal")

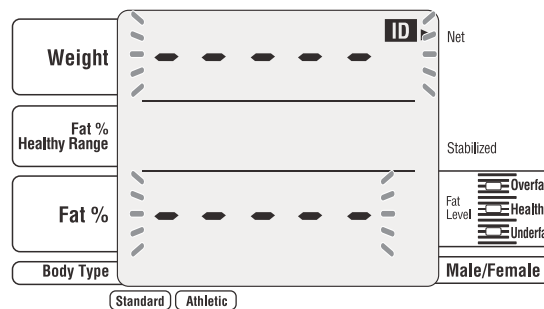

## 5 Introduzca el número de ID.

Introdúzcalo pulsando 0 - 9.

### Nota

- Esta pantalla no aparece si se ha seleccionado OFF en "con o sin ID" (página 141).
- El número de ID puede introducirse dentro del margen de 0 a 999999999. Si se pulsa **Enter / Next**, los dígitos no introducidos se rellenan con ceros.
- Si ha introducido información incorrecta:
  - ⇨ pulse **CE** (se borra la información introducida).
- Si se pulsa **CE** sin haber introducido un número de ID, la máquina vuelve a mostrar la pantalla "inicio de medición".

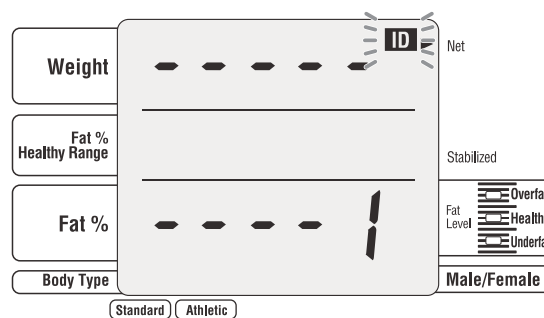

## 6 Pulse **Enter / Next**.

### Nota

- Esta pantalla no aparece si se ha seleccionado OFF en "con o sin ID" (página 141).

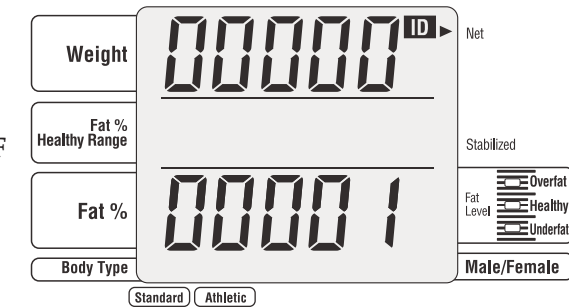

## 7 Seleccione el tipo corporal.

Pulse las teclas de selección de tipo corporal para introducir la información. Cuando se selecciona el tipo corporal, la lámpara parpadea en "Gender" (sexo).

### Nota

- Esta pantalla no aparece si se ha seleccionado OFF en "ON u OFF para el modo atlético" (página 142).
- El tipo corporal también puede seleccionarse con las teclas numéricas (1 2).
- Si ha introducido información incorrecta:
  - ⇨ pulse **CE** (se borra la información introducida y la máquina vuelve a mostrar la pantalla "selección de tipo corporal").
- Si se pulsa **CE** (borrar) sin haber introducido el tipo corporal, la máquina vuelve a mostrar la pantalla "introducción de número de ID" (o la pantalla "inicio de medición").

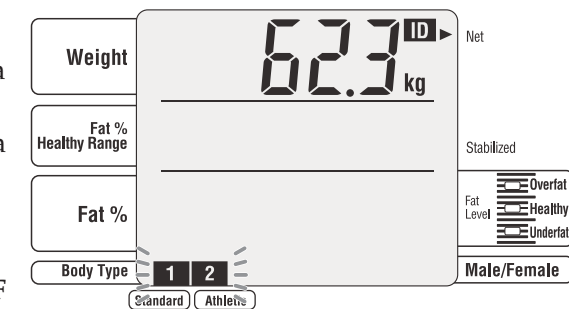

## 8 Seleccione el sexo.

Pulse las teclas de selección de sexo masculino / femenino para introducir la información. Cuando se selecciona masculino o femenino, la lámpara parpadea en "age input" (introducción de edad).

### Nota

- Si ha introducido información incorrecta:
  - ⇨ pulse **CE** (se borra la información introducida y la máquina vuelve a mostrar la pantalla "selección de sexo").
- Si se pulsa **CE** sin haber seleccionado sexo masculino o femenino, la máquina vuelve a mostrar la pantalla "selección de tipo corporal".

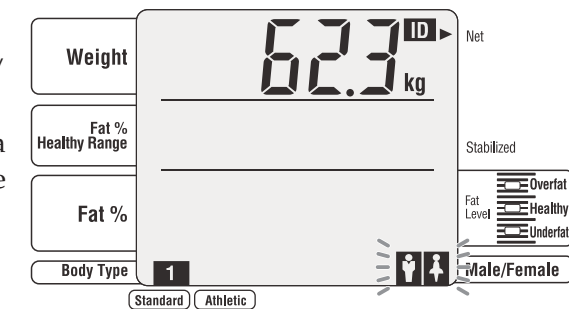

## 9 Introduzca la edad.

Introdúzcala pulsando 0 - 9.

### Nota

- La edad puede introducirse dentro del margen de 5 a 99.
- Si ha introducido información incorrecta:
  - ⇨ pulse **CE** (se borra la información introducida).
- Si se pulsa **CE** sin haber introducido la edad, la máquina vuelve a mostrar la pantalla "selección de sexo masculino/femenino".

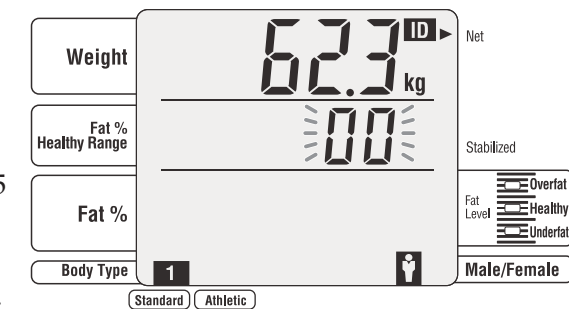

## 10 Pulse **Enter / Next**.

Cuando se introduce la edad, la lámpara parpadea en "height input" (introducción de estatura).



## 11 Introduzca la estatura.

Introdúzcala pulsando **0** - **9**.

### Nota

- La estatura puede introducirse dentro del margen de 3ft -7ft11,5in / 90,0-249,9cm.  
\*Unidad se cambia por **kg / lb** clave.
- Si ha introducido información incorrecta:  
⇒ pulse **CE** (se borra la información introducida).
- Si se pulsa **CE** sin haber introducido la estatura, la máquina vuelve a mostrar la pantalla "selección de edad".



## 12 Pulse **Enter / Next**.

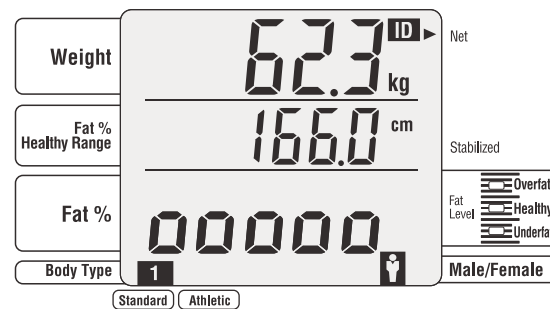

## 13 Se realiza la medición de la composición corporal.

La indicación **88888** se apaga de forma secuencial.

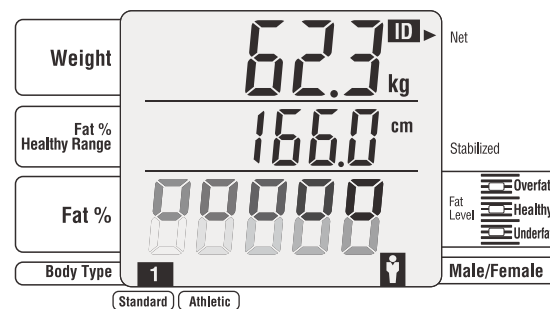

## 14 La medición finaliza.

Se visualiza el resultado de la medición y la estimación del porcentaje de grasa corporal. La información se imprime automáticamente. (Si se ha introducido un número distinto de 0 en "Selección del número de hojas a imprimir" (página 139).

### Nota

- Margen de grasa saludable (el valor numérico en la etapa intermedia) no se visualiza si se ha seleccionado OFF en "ON / OFF para Visualización del margen de % de grasa saludable" (página 141).

Baje de la plataforma.  
La máquina vuelve a mostrar la pantalla "inicio de medición".

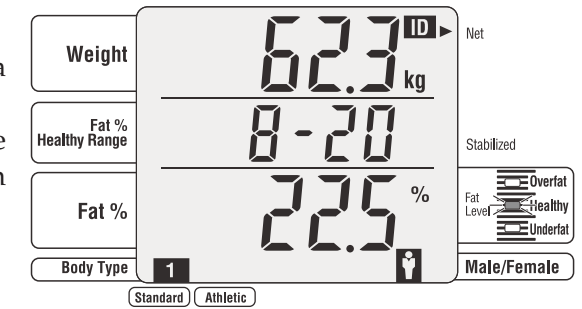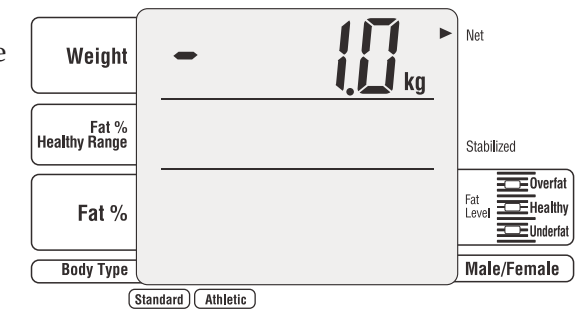

### Cómo leer la información de la pantalla <kg modo>

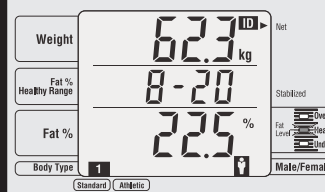

Evaluación basada en el porcentaje de grasa corporal. (página 166.)

### Cómo leer la información de la pantalla <lb modo>

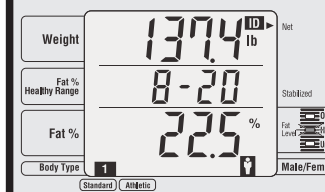

Evaluación basada en el porcentaje de grasa corporal. (página 166.)

### 1 Introduzca el índice de grasa corporal deseado.

Introdúzcalo pulsando un número del **0** al **9**.

#### Nota

- Se visualizará esta pantalla si la configuración ON/OFF del índice de grasa corporal deseado se encuentra en posición ON (ver página 145).
- Puede introducir un índice de grasa corporal deseado de 4 a 55.
- Si introduce una cifra incorrecta, ⇒ Pulse **CE** (la cifra se borra).

Si el número de la página a imprimir se fija en "0", la función de configuración del índice de grasa corporal deseado se apagará (OFF) automáticamente.

Si el índice de grasa corporal deseado se fija en 0 ó nada, este no se imprimirá.

**PRECAUCIONES** Antes de iniciar un programa de gestión del peso corporal y configurar el índice de grasa corporal más adecuado, consulte a su médico. Tanita no se responsabiliza de la configuración del índice de grasa corporal más adecuado para personas específicas.

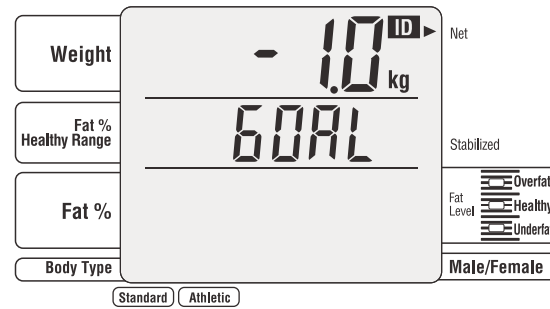

### 1 Pulse **ON/OFF** para encender la unidad.

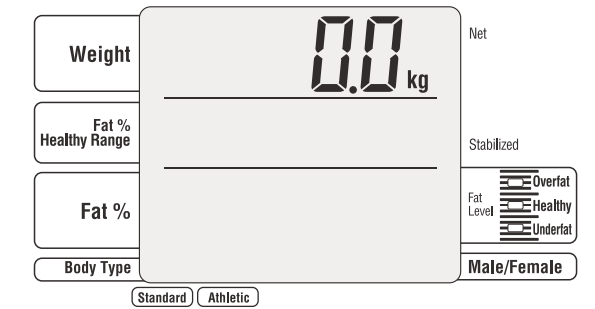

### 2 Compruebe que el monitor de composición corporal está seleccionado e introduzca el peso de la ropa.

Introdúzcalo pulsando **0** - **9** al **.**

#### Nota

- El peso de la ropa (tara preestablecida) puede introducirse dentro del margen de 0,0-20,0lb o 0,0-10,0kg.  
\*incrementos de 0,2lb / 0,1kg  
\*Unidad se cambia por **kg / lb** clave.
- Si ha introducido información incorrecta: ⇒ pulse **CE** (Se borra la información introducida).

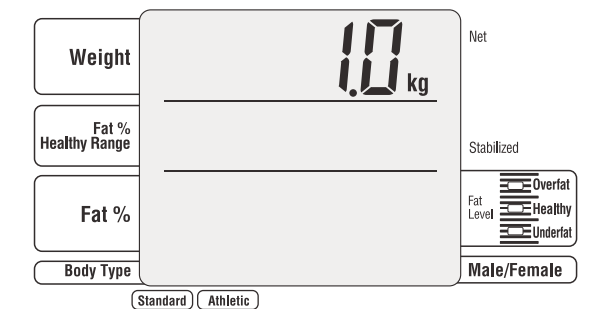

### 3 Pulse **Enter / Next**.

#### Nota

- Esta pantalla no se muestra si la "configuración con o sin Identificador de usuario" de la página 139 está seleccionada en OFF (ver página 141). (Se muestra la pantalla de "selección de tipo de estructura corporal.")

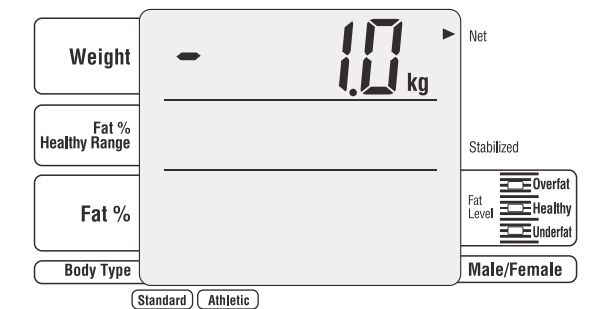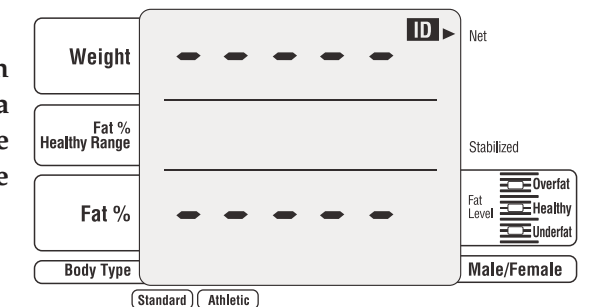

## 4 Introduzca un número de ID.

Introdúzcalo pulsando **0** - **9**.

### Nota

- Esta pantalla no aparece si se ha seleccionado OFF en "con o sin ID" (página 141).
- El número de ID puede introducirse dentro del margen de 0 a 9999999999.
- Si ha introducido información incorrecta:
  - ⇒ pulse **CE** (se borra la información introducida).
- Si se pulsa **CE** sin haber introducido un número de ID, la máquina vuelve a mostrar la pantalla "inicio de medición".

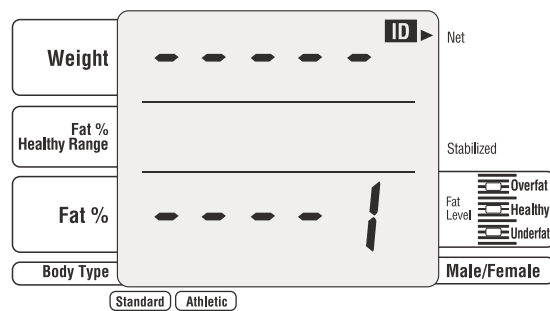

## 5 Pulse **Enter / Next**.

### Nota

- Esta pantalla no aparece si se ha seleccionado OFF en "con o sin ID" (página 141).

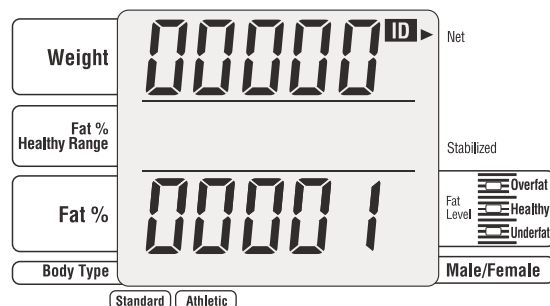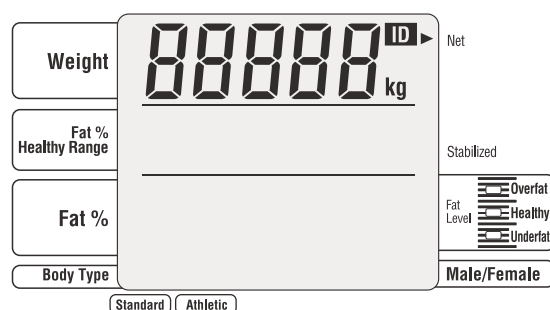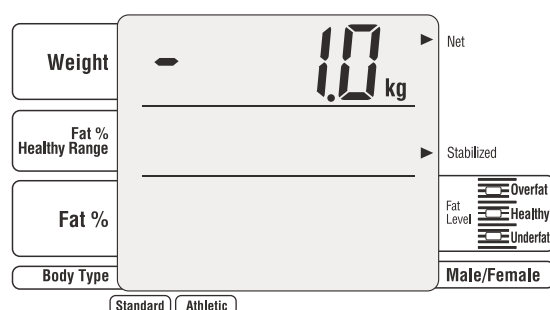

La lámpara parpadea para "step on" (suba a la plataforma).

### Nota

- Si se pulsa **CE**, la máquina vuelve a mostrar la pantalla anterior.

## 6 La medición finaliza.

La información se imprime automáticamente (si se ha introducido un número distinto de 0 en "Selección del número de hojas a imprimir" (página 139)).

Cuando se baje de la plataforma, la máquina cambiará a la pantalla de inicio de medición.

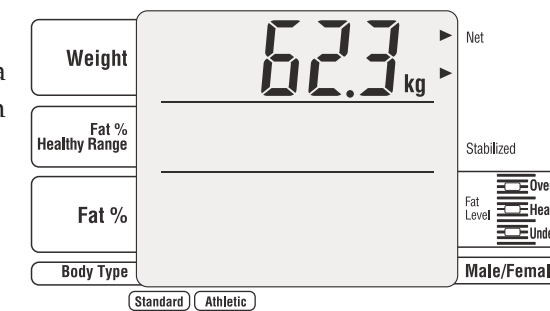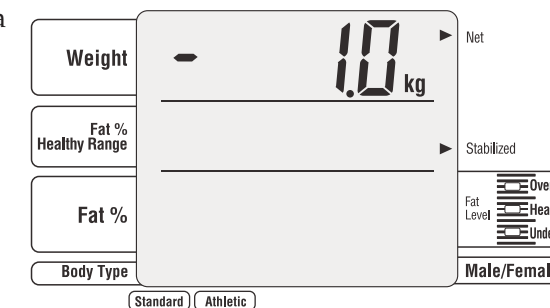



## - ¿Que es el porcentaje de grasa corporal?

Porcentaje de grasa corporal es la cantidad de grasa corporal expresada como una proporción del peso corporal.

Se ha demostrado que la reducción de los niveles excesivos de grasa corporal disminuye el riesgo de ciertas enfermedades tales como la hipertensión arterial, las enfermedades cardiacas, la diabetes y el cáncer. En el gráfico se muestran los niveles saludables de grasa corporal.

**Índices de grasa corporal** para niños medianos <sup>1,2</sup> <sup>1</sup> Susan Jebb et al. *Obesity Research* 2004;12:A156-157  
**Margen de grasa corporal** para adultos normales <sup>3,4</sup> <sup>3</sup> Gallagher D et al. *Am J Clin Nutr* 2000;72:694-701.  
<sup>4</sup> "Nuevas curvas de referencia de grasa corporal para niños" <sup>4</sup> "Healthy percentage body fat ranges: an approach for developing guidelines based on body mass index."

| Mujer<br>Edad | Bajo en grasa |   |   |   | Saludable |   |   |   | Alto en grasa |    |    |    | Obeso |    |    |    |    |    |    |    |    |    |    |    |    |    |    |    |    |    |    |    |    |    |    |    |    |    |    |    |    |    |    |    |    |
|---------------|---------------|---|---|---|-----------|---|---|---|---------------|----|----|----|-------|----|----|----|----|----|----|----|----|----|----|----|----|----|----|----|----|----|----|----|----|----|----|----|----|----|----|----|----|----|----|----|----|
|               | 1             | 2 | 3 | 4 | 5         | 6 | 7 | 8 | 9             | 10 | 11 | 12 | 13    | 14 | 15 | 16 | 17 | 18 | 19 | 20 | 21 | 22 | 23 | 24 | 25 | 26 | 27 | 28 | 29 | 30 | 31 | 32 | 33 | 34 | 35 | 36 | 37 | 38 | 39 | 40 | 41 | 42 | 43 | 44 | 45 |
| 5             | 1             | 2 | 3 | 4 | 5         | 6 | 7 | 8 | 9             | 10 | 11 | 12 | 13    | 14 | 15 | 16 | 17 | 18 | 19 | 20 | 21 | 22 | 23 | 24 | 25 | 26 | 27 | 28 | 29 | 30 | 31 | 32 | 33 | 34 | 35 | 36 | 37 | 38 | 39 | 40 | 41 | 42 | 43 | 44 | 45 |
| 6             | 1             | 2 | 3 | 4 | 5         | 6 | 7 | 8 | 9             | 10 | 11 | 12 | 13    | 14 | 15 | 16 | 17 | 18 | 19 | 20 | 21 | 22 | 23 | 24 | 25 | 26 | 27 | 28 | 29 | 30 | 31 | 32 | 33 | 34 | 35 | 36 | 37 | 38 | 39 | 40 | 41 | 42 | 43 | 44 | 45 |
| 7             | 1             | 2 | 3 | 4 | 5         | 6 | 7 | 8 | 9             | 10 | 11 | 12 | 13    | 14 | 15 | 16 | 17 | 18 | 19 | 20 | 21 | 22 | 23 | 24 | 25 | 26 | 27 | 28 | 29 | 30 | 31 | 32 | 33 | 34 | 35 | 36 | 37 | 38 | 39 | 40 | 41 | 42 | 43 | 44 | 45 |
| 8             | 1             | 2 | 3 | 4 | 5         | 6 | 7 | 8 | 9             | 10 | 11 | 12 | 13    | 14 | 15 | 16 | 17 | 18 | 19 | 20 | 21 | 22 | 23 | 24 | 25 | 26 | 27 | 28 | 29 | 30 | 31 | 32 | 33 | 34 | 35 | 36 | 37 | 38 | 39 | 40 | 41 | 42 | 43 | 44 | 45 |
| 9             | 1             | 2 | 3 | 4 | 5         | 6 | 7 | 8 | 9             | 10 | 11 | 12 | 13    | 14 | 15 | 16 | 17 | 18 | 19 | 20 | 21 | 22 | 23 | 24 | 25 | 26 | 27 | 28 | 29 | 30 | 31 | 32 | 33 | 34 | 35 | 36 | 37 | 38 | 39 | 40 | 41 | 42 | 43 | 44 | 45 |
| 10            | 1             | 2 | 3 | 4 | 5         | 6 | 7 | 8 | 9             | 10 | 11 | 12 | 13    | 14 | 15 | 16 | 17 | 18 | 19 | 20 | 21 | 22 | 23 | 24 | 25 | 26 | 27 | 28 | 29 | 30 | 31 | 32 | 33 | 34 | 35 | 36 | 37 | 38 | 39 | 40 | 41 | 42 | 43 | 44 | 45 |
| 11            | 1             | 2 | 3 | 4 | 5         | 6 | 7 | 8 | 9             | 10 | 11 | 12 | 13    | 14 | 15 | 16 | 17 | 18 | 19 | 20 | 21 | 22 | 23 | 24 | 25 | 26 | 27 | 28 | 29 | 30 | 31 | 32 | 33 | 34 | 35 | 36 | 37 | 38 | 39 | 40 | 41 | 42 | 43 | 44 | 45 |
| 12            | 1             | 2 | 3 | 4 | 5         | 6 | 7 | 8 | 9             | 10 | 11 | 12 | 13    | 14 | 15 | 16 | 17 | 18 | 19 | 20 | 21 | 22 | 23 | 24 | 25 | 26 | 27 | 28 | 29 | 30 | 31 | 32 | 33 | 34 | 35 | 36 | 37 | 38 | 39 | 40 | 41 | 42 | 43 | 44 | 45 |
| 13            | 1             | 2 | 3 | 4 | 5         | 6 | 7 | 8 | 9             | 10 | 11 | 12 | 13    | 14 | 15 | 16 | 17 | 18 | 19 | 20 | 21 | 22 | 23 | 24 | 25 | 26 | 27 | 28 | 29 | 30 | 31 | 32 | 33 | 34 | 35 | 36 | 37 | 38 | 39 | 40 | 41 | 42 | 43 | 44 | 45 |
| 14            | 1             | 2 | 3 | 4 | 5         | 6 | 7 | 8 | 9             | 10 | 11 | 12 | 13    | 14 | 15 | 16 | 17 | 18 | 19 | 20 | 21 | 22 | 23 | 24 | 25 | 26 | 27 | 28 | 29 | 30 | 31 | 32 | 33 | 34 | 35 | 36 | 37 | 38 | 39 | 40 | 41 | 42 | 43 | 44 | 45 |
| 15            | 1             | 2 | 3 | 4 | 5         | 6 | 7 | 8 | 9             | 10 | 11 | 12 | 13    | 14 | 15 | 16 | 17 | 18 | 19 | 20 | 21 | 22 | 23 | 24 | 25 | 26 | 27 | 28 | 29 | 30 | 31 | 32 | 33 | 34 | 35 | 36 | 37 | 38 | 39 | 40 | 41 | 42 | 43 | 44 | 45 |
| 16            | 1             | 2 | 3 | 4 | 5         | 6 | 7 | 8 | 9             | 10 | 11 | 12 | 13    | 14 | 15 | 16 | 17 | 18 | 19 | 20 | 21 | 22 | 23 | 24 | 25 | 26 | 27 | 28 | 29 | 30 | 31 | 32 | 33 | 34 | 35 | 36 | 37 | 38 | 39 | 40 | 41 | 42 | 43 | 44 | 45 |
| 17            | 1             | 2 | 3 | 4 | 5         | 6 | 7 | 8 | 9             | 10 | 11 | 12 | 13    | 14 | 15 | 16 | 17 | 18 | 19 | 20 | 21 | 22 | 23 | 24 | 25 | 26 | 27 | 28 | 29 | 30 | 31 | 32 | 33 | 34 | 35 | 36 | 37 | 38 | 39 | 40 | 41 | 42 | 43 | 44 | 45 |
| 18            | 1             | 2 | 3 | 4 | 5         | 6 | 7 | 8 | 9             | 10 | 11 | 12 | 13    | 14 | 15 | 16 | 17 | 18 | 19 | 20 | 21 | 22 | 23 | 24 | 25 | 26 | 27 | 28 | 29 | 30 | 31 | 32 | 33 | 34 | 35 | 36 | 37 | 38 | 39 | 40 | 41 | 42 | 43 | 44 | 45 |
| 19            | 1             | 2 | 3 | 4 | 5         | 6 | 7 | 8 | 9             | 10 | 11 | 12 | 13    | 14 | 15 | 16 | 17 | 18 | 19 | 20 | 21 | 22 | 23 | 24 | 25 | 26 | 27 | 28 | 29 | 30 | 31 | 32 | 33 | 34 | 35 | 36 | 37 | 38 | 39 | 40 | 41 | 42 | 43 | 44 | 45 |
| 20-39         | 1             | 2 | 3 | 4 | 5         | 6 | 7 | 8 | 9             | 10 | 11 | 12 | 13    | 14 | 15 | 16 | 17 | 18 | 19 | 20 | 21 | 22 | 23 | 24 | 25 | 26 | 27 | 28 | 29 | 30 | 31 | 32 | 33 | 34 | 35 | 36 | 37 | 38 | 39 | 40 | 41 | 42 | 43 | 44 | 45 |
| 40-59         | 1             | 2 | 3 | 4 | 5         | 6 | 7 | 8 | 9             | 10 | 11 | 12 | 13    | 14 | 15 | 16 | 17 | 18 | 19 | 20 | 21 | 22 | 23 | 24 | 25 | 26 | 27 | 28 | 29 | 30 | 31 | 32 | 33 | 34 | 35 | 36 | 37 | 38 | 39 | 40 | 41 | 42 | 43 | 44 | 45 |
| 60-           | 1             | 2 | 3 | 4 | 5         | 6 | 7 | 8 | 9             | 10 | 11 | 12 | 13    | 14 | 15 | 16 | 17 | 18 | 19 | 20 | 21 | 22 | 23 | 24 | 25 | 26 | 27 | 28 | 29 | 30 | 31 | 32 | 33 | 34 | 35 | 36 | 37 | 38 | 39 | 40 | 41 | 42 | 43 | 44 | 45 |

| Hombre<br>Edad | 0% |   |   |   | 10% |   |   |   | 20% |    |    |    | 30% |    |    |    | 40% |    |    |    |    |    |    |    |    |    |    |    |    |    |    |    |    |    |    |    |    |    |    |    |    |    |    |    |    |
|----------------|----|---|---|---|-----|---|---|---|-----|----|----|----|-----|----|----|----|-----|----|----|----|----|----|----|----|----|----|----|----|----|----|----|----|----|----|----|----|----|----|----|----|----|----|----|----|----|
|                | 1  | 2 | 3 | 4 | 5   | 6 | 7 | 8 | 9   | 10 | 11 | 12 | 13  | 14 | 15 | 16 | 17  | 18 | 19 | 20 | 21 | 22 | 23 | 24 | 25 | 26 | 27 | 28 | 29 | 30 | 31 | 32 | 33 | 34 | 35 | 36 | 37 | 38 | 39 | 40 | 41 | 42 | 43 | 44 | 45 |
| 5              | 1  | 2 | 3 | 4 | 5   | 6 | 7 | 8 | 9   | 10 | 11 | 12 | 13  | 14 | 15 | 16 | 17  | 18 | 19 | 20 | 21 | 22 | 23 | 24 | 25 | 26 | 27 | 28 | 29 | 30 | 31 | 32 | 33 | 34 | 35 | 36 | 37 | 38 | 39 | 40 | 41 | 42 | 43 | 44 | 45 |
| 6              | 1  | 2 | 3 | 4 | 5   | 6 | 7 | 8 | 9   | 10 | 11 | 12 | 13  | 14 | 15 | 16 | 17  | 18 | 19 | 20 | 21 | 22 | 23 | 24 | 25 | 26 | 27 | 28 | 29 | 30 | 31 | 32 | 33 | 34 | 35 | 36 | 37 | 38 | 39 | 40 | 41 | 42 | 43 | 44 | 45 |
| 7              | 1  | 2 | 3 | 4 | 5   | 6 | 7 | 8 | 9   | 10 | 11 | 12 | 13  | 14 | 15 | 16 | 17  | 18 | 19 | 20 | 21 | 22 | 23 | 24 | 25 | 26 | 27 | 28 | 29 | 30 | 31 | 32 | 33 | 34 | 35 | 36 | 37 | 38 | 39 | 40 | 41 | 42 | 43 | 44 | 45 |
| 8              | 1  | 2 | 3 | 4 | 5   | 6 | 7 | 8 | 9   | 10 | 11 | 12 | 13  | 14 | 15 | 16 | 17  | 18 | 19 | 20 | 21 | 22 | 23 | 24 | 25 | 26 | 27 | 28 | 29 | 30 | 31 | 32 | 33 | 34 | 35 | 36 | 37 | 38 | 39 | 40 | 41 | 42 | 43 | 44 | 45 |
| 9              | 1  | 2 | 3 | 4 | 5   | 6 | 7 | 8 | 9   | 10 | 11 | 12 | 13  | 14 | 15 | 16 | 17  | 18 | 19 | 20 | 21 | 22 | 23 | 24 | 25 | 26 | 27 | 28 | 29 | 30 | 31 | 32 | 33 | 34 | 35 | 36 | 37 | 38 | 39 | 40 | 41 | 42 | 43 | 44 | 45 |
| 10             | 1  | 2 | 3 | 4 | 5   | 6 | 7 | 8 | 9   | 10 | 11 | 12 | 13  | 14 | 15 | 16 | 17  | 18 | 19 | 20 | 21 | 22 | 23 | 24 | 25 | 26 | 27 | 28 | 29 | 30 | 31 | 32 | 33 | 34 | 35 | 36 | 37 | 38 | 39 | 40 | 41 | 42 | 43 | 44 | 45 |
| 11             | 1  | 2 | 3 | 4 | 5   | 6 | 7 | 8 | 9   | 10 | 11 | 12 | 13  | 14 | 15 | 16 | 17  | 18 | 19 | 20 | 21 | 22 | 23 | 24 | 25 | 26 | 27 | 28 | 29 | 30 | 31 | 32 | 33 | 34 | 35 | 36 | 37 | 38 | 39 | 40 | 41 | 42 | 43 | 44 | 45 |
| 12             | 1  | 2 | 3 | 4 | 5   | 6 | 7 | 8 | 9   | 10 | 11 | 12 | 13  | 14 | 15 | 16 | 17  | 18 | 19 | 20 | 21 | 22 | 23 | 24 | 25 | 26 | 27 | 28 | 29 | 30 | 31 | 32 | 33 | 34 | 35 | 36 | 37 | 38 | 39 | 40 | 41 | 42 | 43 | 44 | 45 |
| 13             | 1  | 2 | 3 | 4 | 5   | 6 | 7 | 8 | 9   | 10 | 11 | 12 | 13  | 14 | 15 | 16 | 17  | 18 | 19 | 20 | 21 | 22 | 23 | 24 | 25 | 26 | 27 | 28 | 29 | 30 | 31 | 32 | 33 | 34 | 35 | 36 | 37 | 38 | 39 | 40 | 41 | 42 | 43 | 44 | 45 |
| 14             | 1  | 2 | 3 | 4 | 5   | 6 | 7 | 8 | 9   | 10 | 11 | 12 | 13  | 14 | 15 | 16 | 17  | 18 | 19 | 20 | 21 | 22 | 23 | 24 | 25 | 26 | 27 | 28 | 29 | 30 | 31 | 32 | 33 | 34 | 35 | 36 | 37 | 38 | 39 | 40 | 41 | 42 | 43 | 44 | 45 |
| 15             | 1  | 2 | 3 | 4 | 5   | 6 | 7 | 8 | 9   | 10 | 11 | 12 | 13  | 14 | 15 | 16 | 17  | 18 | 19 | 20 | 21 | 22 | 23 | 24 | 25 | 26 | 27 | 28 | 29 | 30 | 31 | 32 | 33 | 34 | 35 | 36 | 37 | 38 | 39 | 40 | 41 | 42 | 43 | 44 | 45 |
| 16             | 1  | 2 | 3 | 4 | 5   | 6 | 7 | 8 | 9   | 10 | 11 | 12 | 13  | 14 | 15 | 16 | 17  | 18 | 19 | 20 | 21 | 22 | 23 | 24 | 25 | 26 | 27 | 28 | 29 | 30 | 31 | 32 | 33 | 34 | 35 | 36 | 37 | 38 | 39 | 40 | 41 | 42 | 43 | 44 | 45 |
| 17             | 1  | 2 | 3 | 4 | 5   | 6 | 7 | 8 | 9   | 10 | 11 | 12 | 13  | 14 | 15 | 16 | 17  | 18 | 19 | 20 | 21 | 22 | 23 | 24 | 25 | 26 | 27 | 28 | 29 | 30 | 31 | 32 | 33 | 34 | 35 | 36 | 37 | 38 | 39 | 40 | 41 | 42 | 43 | 44 | 45 |
| 18             | 1  | 2 | 3 | 4 | 5   | 6 | 7 | 8 | 9   | 10 | 11 | 12 | 13  | 14 | 15 | 16 | 17  | 18 | 19 | 20 | 21 | 22 | 23 | 24 | 25 | 26 | 27 | 28 | 29 | 30 | 31 | 32 | 33 | 34 | 35 | 36 | 37 | 38 | 39 | 40 | 41 | 42 | 43 | 44 | 45 |
| 19             | 1  | 2 | 3 | 4 | 5   | 6 | 7 | 8 | 9   | 10 | 11 | 12 | 13  | 14 | 15 | 16 | 17  | 18 | 19 | 20 | 21 | 22 | 23 | 24 | 25 | 26 | 27 | 28 | 29 | 30 | 31 | 32 | 33 | 34 | 35 | 36 | 37 | 38 | 39 | 40 | 41 | 42 | 43 | 44 | 45 |
| 20-39          | 1  | 2 | 3 | 4 | 5   | 6 | 7 | 8 | 9   | 10 | 11 | 12 | 13  | 14 | 15 | 16 | 17  | 18 | 19 | 20 | 21 | 22 | 23 | 24 | 25 | 26 | 27 | 28 | 29 | 30 | 31 | 32 | 33 | 34 | 35 | 36 | 37 | 38 | 39 | 40 | 41 | 42 | 43 | 44 | 45 |
| 40-59          | 1  | 2 | 3 | 4 | 5   | 6 | 7 | 8 | 9   | 10 | 11 | 12 | 13  | 14 | 15 | 16 | 17  | 18 | 19 | 20 | 21 | 22 | 23 | 24 | 25 | 26 | 27 | 28 | 29 | 30 | 31 | 32 | 33 |    |    |    |    |    |    |    |    |    |    |    |    |

## - ¿Que es el metabolismo basal (MB)?

### ¿QUÉ ES BMR?

El MB es el nivel mínimo de energía que su cuerpo necesita para funcionar eficientemente en reposo, incluyendo los órganos de los sistemas respiratorio y circulatorio, el sistema nervioso, el hígado, los riñones y otros órganos. Usted quema calorías independientemente de la actividad que esté realizando, incluso cuando duerme.

Aproximadamente un 70 % de las calorías que se consumen diariamente son utilizadas para el metabolismo basal. Además, cuando se realiza cualquier tipo de actividad se utiliza energía, sin embargo, cuanto más vigorosa sea esa actividad, mayor será la cantidad de calorías que se queme. Ello se debe a que el músculo estriado (que representa aproximadamente un 40% del peso corporal) funciona como un motor y utiliza una gran cantidad de energía. El metabolismo basal se ve afectado en gran medida por la cantidad de músculos que usted tenga; el aumento de la masa muscular ayuda al metabolismo basal.

Realizando estudios con individuos sanos, los científicos han observado que a medida que las personas envejecen, varía su metabolismo basal. El metabolismo basal aumenta a medida que el niño crece. Después de alcanzar un máximo, a la edad de 16 ó 17 años, el metabolismo basal comienza a disminuir como se muestra en el gráfico que aparece a continuación.

Tener un metabolismo basal más elevado aumentará la cantidad de calorías utilizadas y ayudará a reducir la cantidad de grasa corporal. Un metabolismo basal bajo hará que resulte más difícil perder grasa corporal y peso en general.

### ¿CÓMO CALCULA EL MONITOR DE COMPOSICIÓN CORPORAL TANITA EL MB?

El método básico para calcular el MB es una ecuación estándar que utiliza el peso y la edad. Tanita ha investigado exhaustivamente la relación entre el MB y la composición corporal, por lo que ofrece al usuario una medición mucho más exacta y personalizada, basada en la medición de la impedancia. Este método ha sido validado médicamente mediante la utilización de calorimetría indirecta (análisis de la composición del aliento)\*.

\* Reliability on equation for Basal Metabolic Rate: At: 2002 Nutrition Week: A Scientific and Clinical Forum and Exposition Title: International Comparison: Resting Energy Expenditure Prediction Models: The American Journal of CLINICAL NUTRITION (Fiabilidad de la ecuación para el cálculo del metabolismo basal: Publicado en: Semana de nutrición del año 2002: Foro científico y clínico, y título de exposición: Comparación internacional: Modelos para la predicción del gasto de energía en estado de reposo: Revista Americana de NUTRICIÓN CLÍNICA).

## - ¿Qué es la edad metabólica?

Esta función calcula el MB e indica la edad media asociada a ese tipo de metabolismo.

Si su edad metabólica es mayor que su edad real, ello es una señal de que necesita mejorar su metabolismo basal. Hacer más ejercicios ayudará a la creación de tejido muscular sano, lo que a su vez mejorará su edad metabólica.

Los valores de las mediciones que se visualizan en el display van de 12 a 50. Si el valor de la medición fuera menor de 12 aparecerá en el display como "12", y si fuera mayor de 50 aparecerá como "50".

## - ¿Que es la masa muscular?

El valor de masa muscular que aparece en el display incluye los músculos esqueléticos, los músculos lisos (tales como los del corazón y del aparato digestivo) así como el agua contenida en los mismos.

Los músculos desempeñan un papel importante ya que funcionan como un motor en cuanto a lo que a consumo de energía se refiere.

A medida que aumenta su masa muscular, aumenta el consumo su de energía, lo que le ayuda a reducir los niveles excesivos de grasa corporal y a perder peso de una manera saludable.

### ¿Qué es la complexión física?

Esta función evalúa su complexión física de acuerdo con el nivel de grasa corporal y masa muscular de su cuerpo.

A medida que aumenta su actividad y reduce la cantidad de grasa corporal, también variará su complexión física, en correspondencia.

Aunque es posible que no varíe su peso, su masa muscular y sus niveles de grasa corporal pueden estar variando, mejorando su salud y reduciendo los riesgos de contraer ciertas enfermedades.

Cada persona debe trazarse su propio objetivo de complexión física que desee tener, y seguir una dieta y un programa de fitness para alcanzar ese objetivo.

| Resultado | Complexión física   | Explicación                                                                                                                                  |
|-----------|---------------------|----------------------------------------------------------------------------------------------------------------------------------------------|
| 1         | Preobesa            | <b>Obeso con textura pequeña</b>                                                                                                             |
|           |                     | A juzgar por la apariencia para este tipo 1, no parecen gordos. Sin embargo, tienen un índice alto de grasa corporal con masa muscular baja. |
| 2         | Obesa               | <b>Obeso con textura mediana</b>                                                                                                             |
|           |                     | En tanto este tipo 2 tiene un porcentaje alto de grasa corporal, el nivel de masa muscular es moderado.                                      |
| 3         | Complexión robusta  | <b>Obeso con textura grande</b>                                                                                                              |
|           |                     | Este tipo tiene altos tanto el porcentaje de grasa corporal como el de masa muscular, comparados con los de una persona promedio.            |
| 4         | Falta de ejercicios | <b>Masa muscular baja y porcentaje de grasa corporal promedio</b>                                                                            |
|           |                     | Este grupo tiene un índice de grasa corporal promedio en tanto la masa muscular es baja comparada con la promedio.                           |
| 5         | Estándar            | <b>Masa muscular alta y porcentaje de grasa corporal promedio</b>                                                                            |
|           |                     | Aquellos que tienen tanto el índice de grasa corporal como la masa muscular apropiados.                                                      |
| 6         | Musculosa estándar  | <b>Masa muscular promedio y porcentaje de grasa corporal promedio (Atleta)</b>                                                               |
|           |                     | Aquellos que tienen una masa muscular más alta en tanto su porcentaje de grasa corporal es promedio.                                         |
| 7         | Delgada             | <b>Masa muscular baja y grasa corporal baja</b>                                                                                              |
|           |                     | Este tipo tiene un índice de grasa corporal y de masa muscular más bajos.                                                                    |
| 8         | Delgada y musculosa | <b>Delgado y musculoso (Atleta)</b>                                                                                                          |
|           |                     | Este tipo tiene un índice de grasa corporal bajo en tanto tiene una adecuada masa muscular.                                                  |
| 9         | Muy musculosa       | <b>Muy musculoso (Atleta)</b>                                                                                                                |
|           |                     | Este grupo tiene un índice de grasa corporal bajo en tanto tiene mucha masa muscular comparada con la de la persona promedio.                |

Source : Données de l'Université Columbia (New York) & du Tanita Institut (Tokyo)

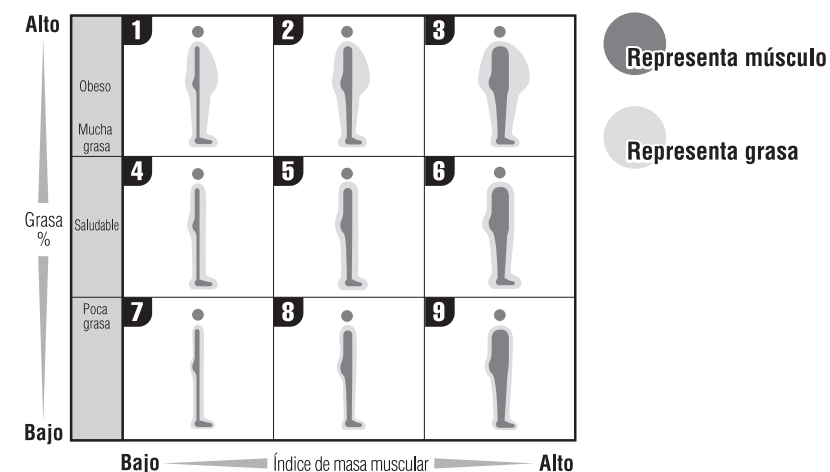

Índice de cantidad de músculo en relación con la altura = Masa muscular (kg) / altura (cm)<sup>2</sup>

## - ¿Qué se entiende por masa ósea?

Esta función indica la cantidad de hueso (nivel mineral del hueso, calcio y otros minerales) en el cuerpo.

Los estudios realizados han demostrado que el ejercicio y el desarrollo de tejido muscular están relacionados con unos huesos más sanos y fuertes. Mientras que es muy probable que la estructura ósea no experimente cambios notables a corto plazo, es importante que tenga huesos sanos y los cuide a través de una dieta equilibrada y mucho ejercicio. Las personas que estén preocupadas por las enfermedades óseas deberían consultar a su médico de cabecera. Puede que la lectura de la masa ósea de personas que tengan osteoporosis o densidad baja del hueso, debido a una edad avanzada, o juvenil, embarazo, tratamientos hormonales u otras causas no sea del todo precisa.

A continuación, se incluye el resultado de la masa ósea estimada de las personas de 20 a 40 años \_franja de edad en la que se supone que tenemos la mayor cantidad de masa ósea\_ por peso. (Fuente: Tanita Body Weight Science Institute).

Utilice los gráficos siguientes como referencia para cotejar la lectura de su masa ósea.

### Mujeres : media de la masa ósea estimada

| Peso (lb)        |                |               |
|------------------|----------------|---------------|
| Less than 110 lb | 110lb - 165 lb | 165 lb and up |
| 4,3 lb           | 5,3 lb         | 6,5 lb        |

| Peso (kg)       |               |              |
|-----------------|---------------|--------------|
| Less than 50 kg | 50 kg - 75 kg | 75 kg and up |
| 1,95 kg         | 2,40 kg       | 2,95 kg      |

### Hombres : media de la masa ósea estimada

| Peso (lb)        |                 |               |
|------------------|-----------------|---------------|
| Less than 143 lb | 143 lb - 209 lb | 209 lb and up |
| 5,9 lb           | 7,3 lb          | 8,1 lb        |

| Peso (kg)       |               |              |
|-----------------|---------------|--------------|
| Less than 65 kg | 65 kg - 95 kg | 95 kg and up |
| 2,66 kg         | 3,29 kg       | 3,69 kg      |

**Nota:** Las personas descritas seguidamente pueden obtener lecturas distintas y deben considerar los valores facilitados únicamente como referencia.

- Personas ancianas - - Mujeres durante o después de la menopausia
- Personas que reciban terapia a base de hormonas

La “masa ósea estimada” es el valor calculado estadísticamente en función de su correlación con la cantidad libre de grasa (tejidos distintos al grasa). Dicha masa no indica directamente la dureza o resistencia de los huesos, ni el riesgo a sufrir fracturas óseas. Si le preocupa el estado de sus huesos, le recomendamos encarecidamente que consulte a un especialista.

# Daño a la unidad

Compruebe los siguientes puntos antes de solicitar reparaciones.

|                          | Síntoma                                                                                                                     | Comprobar                                                                                                                                                                                                                                                                                                                                                                          |
|--------------------------|-----------------------------------------------------------------------------------------------------------------------------|------------------------------------------------------------------------------------------------------------------------------------------------------------------------------------------------------------------------------------------------------------------------------------------------------------------------------------------------------------------------------------|
| Cómo medir               | <b>Error de medición de impedancia</b><br>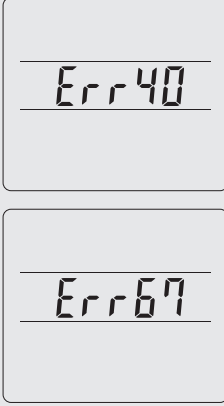 | <ul style="list-style-type: none"> <li>• Efectúe la medición con los pies descalzos.</li> <li>• Si tiene las plantas de los pies secas, aplique aproximadamente 0,5 ml de agua con el cuentagotas suministrado en los electrodos antes de realizar la medición.</li> <li>• Compruebe la información introducida.</li> </ul>                                                        |
|                          | <b>Error de punto cero</b><br>            | <ul style="list-style-type: none"> <li>• Apague la unidad, retire los elementos de la plataforma y vuelva a encender la unidad; luego, vuelva a realizar la medición.</li> </ul>                                                                                                                                                                                                   |
|                          | <b>El peso medido no es estable.</b>                                                                                        | <ul style="list-style-type: none"> <li>• ¿Está instalada la máquina en un lugar afectado por vibraciones?</li> <li>• ¿Está inclinada la plataforma?<br/>⇒ Mantenga la plataforma en posición horizontal. (☞ páginas 132 y 133)</li> <li>• ¿Hay algún objeto atascado en los espacios de la plataforma?<br/>⇒ Retire cualquier objeto que esté atascado en los espacios.</li> </ul> |
| Sección de visualización | <b>No aparece ninguna indicación en la pantalla después de conectar la alimentación eléctrica.</b>                          | <ul style="list-style-type: none"> <li>• Compruebe que la fuente de alimentación está conectada correctamente.</li> </ul>                                                                                                                                                                                                                                                          |
|                          | <b>Se visualiza</b><br>                  | <ul style="list-style-type: none"> <li>• El peso que se desea medir excede el margen de medición.</li> </ul>                                                                                                                                                                                                                                                                       |

|           | Síntoma                                                                                                                            | Comprobar                                                                                                                                                                                                                                                                                                                                                       |
|-----------|------------------------------------------------------------------------------------------------------------------------------------|-----------------------------------------------------------------------------------------------------------------------------------------------------------------------------------------------------------------------------------------------------------------------------------------------------------------------------------------------------------------|
| Impresora | <b>El papel se ha acabado</b><br>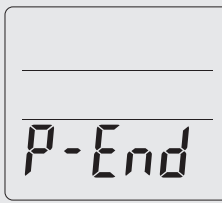               | <ul style="list-style-type: none"> <li>• No se ha introducido papel en la impresora.<br/>⇒ Introduzca papel.</li> <li>⇒ Si la impresora no está en uso, pulse <b>CE</b> y vuelva a realizar los ajustes iniciales.</li> </ul>                                                                                                                                   |
|           | <b>La tapa de la impresora está abierta</b><br> | <ul style="list-style-type: none"> <li>• La tapa de la impresora está abierta.<br/>⇒ Círrrela correctamente.</li> <li>⇒ Compruebe que el papel de la impresora no se esté alimentando de forma oblicua.</li> </ul>                                                                                                                                              |
|           | <b>El papel no sale.</b>                                                                                                           | <p><b>Compruebe los ajustes.</b></p> <ul style="list-style-type: none"> <li>• ¿Se ha seleccionado 0 para el número de hojas a imprimir en "selección del número de hojas a imprimir?"<br/>⇒ Pulse 1 - 3. (☞ página 139)</li> <li>• La impresora puede tener un desperfecto.<br/>⇒ Póngase en contacto con el distribuidor que le vendió el producto.</li> </ul> |
|           | <b>El papel sale, pero la información no se imprime.</b>                                                                           | <ul style="list-style-type: none"> <li>• ¿Se ha introducido el papel al revés en la impresora?<br/>⇒ Introduzca el papel correctamente (☞ página 135)</li> <li>• La impresora puede tener un desperfecto.<br/>⇒ Póngase en contacto con el distribuidor que le vendió el producto.</li> </ul>                                                                   |

## Nota

- Si aparece un error distinto de los descritos anteriormente, apague la unidad y vuelva a realizar la medición.
- Si aparece un mismo error repetidamente, póngase en contacto con nuestro centro de atención al cliente.

E

Cuando sea necesario  
(Daño a la unidad)

E

Cuando sea necesario  
(Daño a la unidad)



# Conexión a un ordenador personal

## - Especificaciones

|                           |                                    |
|---------------------------|------------------------------------|
| Normas de comunicación    | USB                                |
| Método de comunicación    | Método de comunicación asincrónica |
| Velocidad de la señal     | 9600 bps                           |
| Longitud de bits de datos | 8 bits                             |
| Paridad                   | NINGUNA                            |
| Bit de parada             | 1 bit                              |
| Control de flujo          | NINGUNA                            |
| Terminador                | CR+LF                              |

### Nota

- En la parte trasera de la unidad, se encuentran ubicados un conector USB (hembra de 4 clavijas y tipo B).
- Los cables de conexión no viene incluidos, utilice los suyos según proceda.  
USB: (macho) de 4 clavijas y tipo A - (macho) de 4 clavijas y tipo B.
- Vous devez installer sur votre PC le pilote nécessaire, à télécharger depuis <http://www.tanita.com>.

## - Datos de transmisión

**⚠ PRECAUCIONES** La transmisión de datos se efectúa inmediatamente después de realizar las mediciones sea cual sea el tipo de equipo receptor (ordenador personal, etc.). Por tanto el equipo receptor ha de estar preparado antes de las mediciones para recibir los datos.

### (1) Formato de datos de salida

#### Nota

- Les données respectives sont séparées par des virgules (,).
- El terminador (fin de los datos) es CR (código ASCII 0DH), LF (código ASCII 0AH). Un 0 aquí corresponde a cero.
- Les données de contrôle pour les éléments 1 – 4 sont pour des extensions. Elles ne sont pas utilisées actuellement et le côté réception peut donc les ignorer.
- En raison de ses spécifications, le pèse-personne sortira un signal non pertinent approximativement 0,1 secondes après la sortie de données. Assurez-vous que ce signal est ignoré et ne l'importez pas.

#### Datos completos del cuerpo entero

|        |                 |               |                 |            |
|--------|-----------------|---------------|-----------------|------------|
| Modelo | Número de serie | Número de ID  | Fecha           | Hora       |
| MO     | "XXXXXX" SN     | "XXXXXXXX" ID | Dt "mm/dd/yyyy" | TI "hh:mm" |

  

|               |       |      |        |                 |
|---------------|-------|------|--------|-----------------|
| Tipo corporal | Sexo  | Edad | Altura | Peso de la ropa |
| Bt            | 0or2  | GE   | 1or2   | AG XX           |
| Hm            | XXX.X | Pt   | XX.X   |                 |

  

|       |         |            |                     |               |
|-------|---------|------------|---------------------|---------------|
| Peso  | % grasa | Masa grasa | Masa libre de grasa | Masa muscular |
| Wk    | XXX.X   | FW         | XX.X                | rW            |
| XXX.X | MW      | XXX.X      | mW                  | XXX.X         |

  

|                                               |           |                         |                         |                      |
|-----------------------------------------------|-----------|-------------------------|-------------------------|----------------------|
| Puntuación de masa muscular del cuerpo entero | Masa ósea | Agua total en el cuerpo | Índice de agua corporal | Índice masa corporal |
| sW                                            | XX        | bW                      | XXX.X                   | wW                   |
| XXX.X                                         | ww        | XX.X                    | MI                      | XXX.X                |

  

|               |          |                          |                                  |                                    |
|---------------|----------|--------------------------|----------------------------------|------------------------------------|
| Peso estándar | Obesidad | Índice de grasa visceral | Índice de metabolismo basal (kJ) | Índice de metabolismo basal (kcal) |
| Sw            | XXX.X    | OV                       | XXX.X                            | IF                                 |
| XX            | rb       | XXXXX                    | rB                               | XXXXX                              |

  

|                            |                 |                           |                    |                          |
|----------------------------|-----------------|---------------------------|--------------------|--------------------------|
| Análisis metabolismo basal | Edad metabólica | Target% de grasa corporal | Predicción de peso | Predicción de masa grasa |
| rJ                         | XX              | rA                        | XX                 | gF                       |
| XX                         | gW              | XXX.X                     | gf                 | XXX.X                    |

  

|                         |                    |                      |
|-------------------------|--------------------|----------------------|
| Grasa de ganar / perder | Impedancia (50kHz) | Suma de comprobación |
| gt                      | XXXXX.X            | ZF                   |
| XXX.X                   | CS                 | XX                   |

(2) Datos de salida

<modo kg / cm>

| Elemento                                      | Encabezado | Formato          | Índice                                           | Orden de salida                 |        |      |         |
|-----------------------------------------------|------------|------------------|--------------------------------------------------|---------------------------------|--------|------|---------|
|                                               |            |                  |                                                  | Monitor de composición corporal |        |      | Báscula |
|                                               |            |                  |                                                  | Adulto                          | Atleta | Niño |         |
| Datos de control                              | {0         |                  | Fijado a 2 bytes                                 | 1                               | 1      | 1    | 1       |
| Datos de control                              | ~0         |                  | Fijado a1 byte                                   | 2                               | 2      | 2    | 2       |
| Datos de control                              | ~1         |                  | Fijado a1 byte                                   | 3                               | 3      | 3    |         |
| Datos de control                              | ~2         |                  | Fijado a1 byte                                   | 4                               | 4      | 4    |         |
| Modelo                                        | MO         | "XXXXXX"         | Fijado a 8 bytes ("SC-331")                      | 5                               | 5      | 5    | 3       |
| Número de serie                               | SN         | "XXXXXXXX"       | Fijado a 10 bytes                                | 6                               | 6      | 6    | 4       |
| Número de ID                                  | ID         | "XXXXXXXXXX"     | Fijado a 12 bytes                                | 7                               | 7      | 7    | 5       |
| Fecha                                         | Dt         | "mm / dd / yyyy" | Fijado a 12 bytes ("mm / dd / yyyy")             | 8                               | 8      | 8    | 6       |
| Hora                                          | TI         | "hh : mm"        | Fijado a 7 bytes                                 | 9                               | 9      | 9    | 7       |
| Tipo corporal                                 | Bt         | 0 or 2           | Fijado a1 byte (0:Estándar 2:Atleta)             | 10                              | 10     | 10   |         |
| Sexo                                          | GE         | 1 or 2           | Fijado a1 byte (1:Masculino 2:Femenino)          | 11                              | 11     | 11   |         |
| Edad                                          | AG         | XX               | Puede variar de 1 a 2 bytes                      | 12                              | 12     | 12   |         |
| Altura                                        | Hm         | XXX.X            | Puede variar de 4 a 5 bytes (cm)                 | 13                              | 13     | 13   |         |
| Peso de la ropa                               | Pt         | XX.X             | Puede variar de 3 av 4 bytes (unidades de 0,1kg) | 14                              | 14     | 14   | 8       |
| Peso                                          | Wk         | XXX.X            | Puede variar de 3 a 5 bytes (unidades de 0,1kg)  | 15                              | 15     | 15   | 9       |
| % grasa                                       | FW         | XX.X             | Puede variar de 3 a 4 bytes (unidades de 0,1%)   | 16                              | 16     | 16   |         |
| Masa grasa                                    | fW         | XXX.X            | Puede variar de 3 a 5 bytes (unidades de 0,1kg)  | 17                              | 17     | 17   |         |
| Masa libre de grasa                           | MW         | XXX.X            | Puede variar de 3 a 5 bytes (unidades de 0,1kg)  | 18                              | 18     | 18   |         |
| Masa muscular                                 | mW         | XXX.X            | Puede variar de 3 a 5 bytes (unidades de 0,1kg)  | 19                              | 19     |      |         |
| Puntuación de masa muscular del cuerpo entero | sW         | XX               | Puede variar de 1 a 2 bytes (1 a 24)             | 20                              | 20     |      |         |
| Masa ósea                                     | bW         | XXX.X            | Puede variar de 3 a 5 bytes (unidades de 0,1kg)  | 21                              | 21     |      |         |
| Agua total en el cuerpo                       | wW         | XXX.X            | Puede variar de 3 a 5 bytes (unidades de 0,1kg)  | 22                              | 22     |      |         |
| Índice de agua corporal                       | ww         | XX.X             | Fijado a 4 bytes                                 | 23                              | 23     |      |         |
| Índice masa corporal                          | MI         | XXX.X            | Puede variar de 3 a 5 bytes (unidades de 0,1)    | 24                              | 24     | 19   |         |
| Peso estándar                                 | Sw         | XXX.X            | Puede variar de 3 a 5 bytes (unidades de 0,1kg)  | 25                              |        |      |         |
| Obesidad                                      | OV         | XXX.X            | Puede variar de 3 a 5 bytes (unidades de 0,1%)   | 26                              |        |      |         |
| Índice de grasa visceral                      | IF         | XX               | Puede variar de 1 a 2 bytes                      | 27                              | 25     |      |         |
| Índice de metabolismo basal (kJ)              | rb         | XXXXX            | Puede variar de 1 a 5 bytes (unidades de 1kJ)    | 28                              | 26     |      |         |
| Índice de metabolismo basal (kcal)            | rB         | XXXXX            | Puede variar de 1 a 5 bytes (unidades de 1kcal)  | 29                              | 27     |      |         |
| Análisis metabolismo basal                    | rJ         | XX               | Puede variar de 1 a 2 bytes (1 a 24)             | 30                              | 28     |      |         |
| Edad metabólica                               | rA         | XX               | Fijado a 2 bytes                                 | 31                              | 29     |      |         |
| Target% de grasa corporal                     | gF         | XX               | Puede variar de 1 a 2 bytes (4 a 55)             | 32                              | 30     | 20   |         |
| Predicción de peso                            | gW         | XXX.X            | Puede variar de 3 a 5 bytes (unidades de 0,1kg)  | 33                              | 31     | 21   |         |
| Predicción de masa grasa                      | gf         | XXX.X            | Puede variar de 3 a 5 (unidades de 0,1kg)        | 34                              | 32     | 22   |         |
| Aumento de grasa / pérdida                    | gt         | XXXXX.X          | Puede variar de 3 a 7 (unidades de 0,1kg)        | 35                              | 33     | 23   |         |
| Impedancia (50kHz)                            | ZF         | XXXX.X           | Puede variar de 5 a 6 (unidades de 0,1)          | 36                              | 34     | 24   |         |
| Suma de comprobación                          | CS         | XX               | Fijado a 2 bytes                                 | 37                              | 35     | 25   | 10      |

<modo lb / ft-in>

| Elemento                                      | Encabezado | Formato          | Índice                                           | Orden de salida                 |        |      |         |
|-----------------------------------------------|------------|------------------|--------------------------------------------------|---------------------------------|--------|------|---------|
|                                               |            |                  |                                                  | Monitor de composición corporal |        |      | Báscula |
|                                               |            |                  |                                                  | Adulto                          | Atleta | Niño |         |
| Datos de control                              | {0         |                  | Fijado a 2 bytes                                 | 1                               | 1      | 1    | 1       |
| Datos de control                              | ~0         |                  | Fijado a1 byte                                   | 2                               | 2      | 2    | 2       |
| Datos de control                              | ~1         |                  | Fijado a1 byte                                   | 3                               | 3      | 3    |         |
| Datos de control                              | ~2         |                  | Fijado a1 byte                                   | 4                               | 4      | 4    |         |
| Modelo                                        | MO         | "XXXXXX"         | Fijado a 8 bytes ("SC-331")                      | 5                               | 5      | 5    | 3       |
| Número de serie                               | SN         | "XXXXXXXX"       | Fijado a 10 bytes                                | 6                               | 6      | 6    | 4       |
| Número de ID                                  | ID         | "XXXXXXXXXX"     | Fijado a 12 bytes                                | 7                               | 7      | 7    | 5       |
| Fecha                                         | Dt         | "mm / dd / yyyy" | Fijado a 12 bytes ("mm / dd / yyyy")             | 8                               | 8      | 8    | 6       |
| Hora                                          | TI         | "hh : mm"        | Fijado a 7 bytes                                 | 9                               | 9      | 9    | 7       |
| Tipo corporal                                 | Bt         | 0 or 2           | Fijado a1 byte (0:Estándar 2:Atleta)             | 10                              | 10     | 10   |         |
| Sexo                                          | GE         | 1 or 2           | Fijado a1 byte (1:Masculino 2:Femenino)          | 11                              | 11     | 11   |         |
| Edad                                          | AG         | XX               | Puede variar de 1 a 2 bytes                      | 12                              | 12     | 12   |         |
| Altura                                        | Hi         | XX.X             | Puede variar de 4 a 5 bytes (in)                 | 13                              | 13     | 13   |         |
| Peso de la ropa                               | Pt         | XX.X             | Puede variar de 3 av 4 bytes (unidades de 0,2lb) | 14                              | 14     | 14   | 8       |
| Peso                                          | Wp         | XXX.X            | Puede variar de 3 a 5 bytes (unidades de 0,2lb)  | 15                              | 15     | 15   | 9       |
| % grasa                                       | FW         | XX.X             | Puede variar de 3 a 4 bytes (unidades de 0,1%)   | 16                              | 16     | 16   |         |
| Masa grasa                                    | fW         | XXX.X            | Puede variar de 3 a 5 bytes (unidades de 0,2lb)  | 17                              | 17     | 17   |         |
| Masa libre de grasa                           | MW         | XXX.X            | Puede variar de 3 a 5 bytes (unidades de 0,2lb)  | 18                              | 18     | 18   |         |
| Masa muscular                                 | mW         | XXX.X            | Puede variar de 3 a 5 bytes (unidades de 0,2lb)  | 19                              | 19     |      |         |
| Puntuación de masa muscular del cuerpo entero | sW         | XX               | Puede variar de 1 a 2 bytes (1 a 24)             | 20                              | 20     |      |         |
| Masa ósea                                     | bW         | XXX.X            | Puede variar de 3 a 5 bytes (unidades de 0,2lb)  | 21                              | 21     |      |         |
| Agua total en el cuerpo                       | wW         | XXX.X            | Puede variar de 3 a 5 bytes (unidades de 0,2lb)  | 22                              | 22     |      |         |
| Índice de agua corporal                       | ww         | XX.X             | Fijado a 4 bytes                                 | 23                              | 23     |      |         |
| Índice masa corporal                          | MI         | XXX.X            | Puede variar de 3 a 5 bytes (unidades de 0,1)    | 24                              | 24     | 19   |         |
| Peso estándar                                 | Sw         | XXX.X            | Puede variar de 3 a 5 bytes (unidades de 0,2lb)  | 25                              |        |      |         |
| Obesidad                                      | OV         | XXX.X            | Puede variar de 3 a 5 bytes (unidades de 0,1%)   | 26                              |        |      |         |
| Índice de grasa visceral                      | IF         | XX               | Puede variar de 1 a 2 bytes                      | 27                              | 25     |      |         |
| Índice de metabolismo basal (kJ)              | rb         | XXXXX            | Puede variar de 1 a 5 bytes (unidades de 1kJ)    | 28                              | 26     |      |         |
| Índice de metabolismo basal (kcal)            | rB         | XXXXX            | Puede variar de 1 a 5 bytes (unidades de 1kcal)  | 29                              | 27     |      |         |
| Análisis metabolismo basal                    | rJ         | XX               | Puede variar de 1 a 2 bytes (1 a 24)             | 30                              | 28     |      |         |
| Edad metabólica                               | rA         | XX               | Fijado a 2 bytes                                 | 31                              | 29     |      |         |
| Target% de grasa corporal                     | gF         | XX               | Puede variar de 1 a 2 bytes (4 a 55)             | 32                              | 30     | 20   |         |
| Predicción de peso                            | gW         | XXX.X            | Puede variar de 3 a 5 bytes (unidades de 0,2lb)  | 33                              | 31     | 21   |         |
| Predicción de masa grasa                      | gf         | XXX.X            | Puede variar de 3 a 5 (unidades de 0,2lb)        | 34                              | 32     | 22   |         |
| Aumento de grasa / pérdida                    | gt         | XXXXX.X          | Puede variar de 3 a 7 (unidades de 0,2lb)        | 35                              | 33     | 23   |         |
| Impedancia (50kHz)                            | ZF         | XXXX.X           | Puede variar de 5 a 6 (unidades de 0,1)          | 36                              | 34     | 24   |         |
| Suma de comprobación                          | CS         | XX               | Fijado a 2 bytes                                 | 37                              | 35     | 25   | 10      |

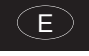

Quando sea necesario  
(Conexión a un ordenador personal)

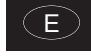

Quando sea necesario  
(Conexión a un ordenador personal)

## Medición de la composición corporal mediante el método BIA.

### Introducción

Este equipo proporciona valores estimados para cada valor medido de porcentaje de grasa corporal, masa de grasa, masa libre de grasa, masa muscular y masa ósea mediante el método DXA para Japón, así como un valor estimado para el valor medido de agua corporal total mediante el método de dilución que utiliza un análisis de impedancia bioeléctrica (método BIA).

Para realizar una medición, se debe seleccionar un modo según el tipo corporal.

- 1) Estándar (para 5 a 99 años de edad)
- 2) Atlético (para atletas que se ejercitan más que el común de las personas)

La fiabilidad de la medición de la composición corporal de atletas, etc., que tienen una composición distinta al común de las personas, puede mejorarse dividiendo el modo de medición según cada tipo corporal.

### - Principios de medición de la composición de estructura corporal

AIB es un método para medir la composición corporal – masa grasa, masa muscular estimada, etc. – mediante la medición de la impedancia bioeléctrica en el cuerpo. La grasa que se encuentra en el cuerpo no es un buen conductor de electricidad, mientras que el agua, cuya mayor parte se encuentra en los músculos, es un conductor eficaz de la electricidad. El grado de dificultad con el que la electricidad se transmite a través de una sustancia se conoce como resistencia eléctrica y el porcentaje de grasa y otros componentes corporales puede inferirse a partir de la medición de esta resistencia. El Analizador de la Composición Corporal de Tanita mide la composición corporal utilizando una fuente de corriente continua que genera una corriente de alta frecuencia (50kHz, 90µA).

### - ¿Qué es el método DXA?

La absorciometría radiológica dual (DXA) se diseñó en un principio para medir el contenido mineral de los huesos, pero en el modo de exploración mediante escáner del cuerpo entero el porcentaje de grasa corporal, la masa grasa y la masa libre de grasa de determinadas partes del cuerpo (brazos, piernas, tronco) también puede medirse. La imagen de abajo muestra un ejemplo de los resultados de la medición de la composición corporal obtenidos mediante la DXA.

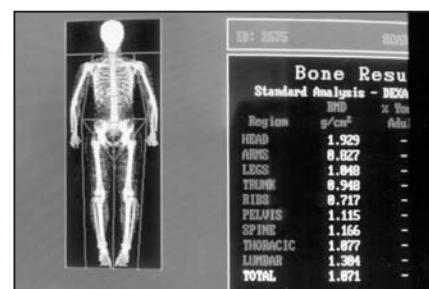

Resultados de la medición de la composición corporal obtenidos mediante la DXA (Lunar Co., Ltd; DPX-L)

### - ¿Qué es el método de dilución?

En el método de dilución se utiliza una cantidad conocida de una sustancia etiquetada y se mide la concentración en equilibrio que se diluye uniformemente para obtener la cantidad total de disolvente que diluye a la sustancia etiquetada.

Para medir el agua corporal total (ACT), generalmente se utiliza óxido de deuterio (D<sub>2</sub>O) como sustancia etiquetada. El óxido de deuterio utiliza el agua corporal total general como medio de dilución, lo que permite obtener el agua corporal total. Para obtener la cantidad de fluido extracelular se utiliza bromuro de sodio (NaBr) como sustancia etiquetada. Se dice que el bromuro (Br) no penetra al interior de las células y que utiliza el fluido extracelular como medio de dilución.

### - ¿Qué es la grasa visceral?

El tejido adiposo visceral (VAT) es la grasa que se acumula en la cavidad abdominal y alrededor de los órganos internos. Se dice que el VAT es más susceptible de causar enfermedades relativas al estilo de vida que el tejido adiposo subcutáneo (SCAT). Por ello, conocer y revisar periódicamente el riesgo de acumulación de VAT es un valioso consejo para la prevención de enfermedades relativas al estilo de vida.

Tanita ha desarrollado una tecnología para la medición del riesgo de acumulación de VAT por análisis de impedancia bioeléctrica (BIA) mediante comparación con el análisis de imágenes aplicadas a las imágenes de resonancia magnética, además de la tecnología tradicional para la medición de la grasa corporal. El riesgo de acumulación de VAT se calcula mediante la estimación del área VAT por el método BIA en base al procesado de imágenes de resonancia magnética. Este método tiene una correlación superior a la estimación de riesgo de acumulación de VAT sobre el índice de masa corporal o la circunferencia abdominal (circunferencia en la cintura), permitiendo una estimación que se corresponde de una forma más precisa con cada individuo.

\* El área VAT mediante resonancia magnética se calcula con la realización del procesado de imágenes de la sección transversal de las regiones de las vértebras lumbares L4-L5.

(Imagen 1 – Imagen 3: Resultados de la investigación realizada por N.Y Columbia University y Jikei University publicados por la Asociación norteamericana para el estudio de la obesidad (NAASO) en 2004)

## - Factores que producen errores de medición

En el método BIA se mide la impedancia y se calcula la composición corporal a partir del valor obtenido. Se sabe que la impedancia cambia en una cantidad correspondiente al agua corporal total que ocupa aproximadamente el 60% del peso y que su distribución y temperatura cambian. Por esta razón, ya sea para fines de investigación para realizar mediciones que se repiten diariamente, las condiciones de medición deben mantenerse constantes. La adopción de la tecnología de reactancia permite obtener mediciones de una estabilidad nunca antes vista; sin embargo, los cambios de temperatura y distribución del agua corporal total o de volumen de flujo sanguíneo en las extremidades debido a ejercicios, baños, etc., afectan los resultados de las mediciones debido a que la resistencia eléctrica del cuerpo también cambia.

Por lo tanto, se recomienda efectuar las mediciones en las condiciones siguientes para obtener resultados estables.

- 1) Después de 3 horas de levantarse, habiendo realizado las actividades diarias normales de este período. (La impedancia se mantiene en un nivel alto si usted permanece sentado después de levantarse o si sólo se mueve en un coche, etc.)
- 2) Cuando hayan transcurrido 3 horas o más tiempo después de comer. (2 a 3 después de comer, la impedancia tiende a disminuir).
- 3) Cuando hayan transcurrido 12 horas o más tiempo después de hacer ejercicio. (Dependiendo del tipo e intensidad del ejercicio, la impedancia no tiende a cambiar de forma estable).
- 4) Vacíe la vejiga antes de realizar la medición.
- 5) En caso de mediciones repetidas, realice las mediciones a la misma hora si es posible. (Al mismo tiempo que se realiza la medición de peso, las mediciones pueden ser más estables si se realizan a la misma hora del día).

Se pueden obtener valores muy estables realizando las mediciones en las condiciones descritas anteriormente.

En el desarrollo de este equipo se establecieron 6 puntos como condiciones para la ecuación de regresión.

- 1) Prohibición de ingerir alcohol hasta 12 horas antes de la medición.
- 2) Prohibición de hacer ejercicio excesivo hasta 12 horas antes de la medición.
- 3) Prohibición de comer y beber en exceso en el día anterior a la medición
- 4) Prohibición de comer y beber hasta 3 horas antes de la medición.
- 5) Evitar realizar las mediciones durante el período menstrual (mujeres)

## 2) Variaciones interdiarias

Los diagramas que se muestran debajo incluyen ejemplos de mediciones reales sobre variaciones interdiarias. Se realizó un estudio para determinar el grado de variación de la impedancia entre los pies durante el estado de deshidratación. Los primeros dos días representan la rutina cotidiana normal del sujeto, mientras que en los dos días posteriores se indujo el estado de deshidratación mediante una sauna.

Durante la rutina cotidiana no se registraron variaciones interdiarias de importancia en cuanto al peso corporal, la impedancia entre los pies o el porcentaje de grasa corporal. Sin embargo, durante el estado de deshidratación se registró una disminución del peso corporal de 1kg y un aumento de la impedancia entre los pies de aproximadamente 15Ω, durante el

primer día en el que se indujo la deshidratación, y de 30-35Ω el segundo día. Como consecuencia de ello, el porcentaje de grasa corporal

aumentó el 1% el primer día en el que se indujo la deshidratación y el 1,5-2% el segundo día.

Como se ha mencionado anteriormente, la impedancia aumenta cuando el peso corporal disminuye (por ejemplo, debido a la deshidratación) y disminuye cuando el peso corporal aumenta debido a excesos en el consumo de comida y bebida. La variación interdiaria de la impedancia es por lo tanto inversamente proporcional al cambio del peso corporal.

Estas variaciones interdiarias son causadas por factores como:

- 1) Aumentos temporales del peso corporal (agua corporal total) originados por comer o beber en exceso.
- 2) Deshidratación debida a sudoración abundante durante la realización de ejercicio intenso.
- 3) Deshidratación debida al consumo de alcohol o al uso de diuréticos.
- 4) Deshidratación debida a la sudoración abundante durante la toma de saunas, etc.

Por consiguiente, se recomienda proporcionar al sujeto instrucciones para ayudar a eliminar estas causas cuando se requieran mediciones precisas.

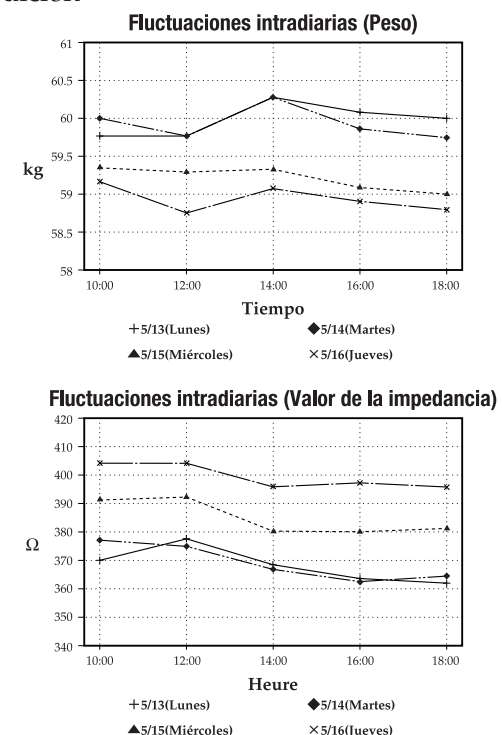



# La nueva fórmula de regresión para calcular la Tasa Metabólica Basal (MB)

Hace tiempo que los médicos y los especialistas en nutrición afirman que “La Tasa Metabólica Basal (MB) depende más de la Masa Libre de Grasa (MLG) que del peso corporal” (es decir, las personas que tengan un peso corporal determinado con mayor MLG tendrán una mayor MB) y que la evaluación de la composición corporal debería estimarse a partir de la MLG. Además, en ocasiones las fórmulas de estimación sencillas que permiten la realización de cálculos a partir de la altura, el peso y la edad, sin evaluar la composición corporal, suponían un problema al proporcionar resultados de evaluaciones de la MB excesivamente altos a personas obesas con un peso corporal elevado y, a la inversa, resultados excesivamente bajos a atletas musculosos, aunque estos casos no fuesen tan numerosos. En la actualidad, la fórmula de recurrencia para la estimación de la MB desarrollada por Tanita, el fabricante de analizadores de la composición corporal, basándose en sus investigaciones, funciona mediante el análisis de regresión múltiple utilizando la MLG y proporciona un grado de precisión más elevado respecto a las diferencias individuales de la composición corporal. Para obtener la MB, se midió el metabolismo respiratorio durante el reposo (Gasto Energético en Reposo: GER) mediante un analizador de los gases respiratorios y basándose en estos datos se creó la fórmula de recurrencia para la realización de estimaciones.

**<Gráfica 1> La relación entre el Gasto Energético en Reposo (GER) según el análisis de los gases respiratorios y del peso, MGL**  
(Presentado en la Semana de la Nutrición “Nutrition Week”, celebrada en San Diego en el 2002)

Como se muestra en la Gráfica 1: el GER (MB) mantiene una relación más afín con la MLG que con el peso corporal, además se observa una diferencia en las tendencias de distribución entre los hombres y las mujeres. Por ello, entendemos que, en un principio, los cálculos deberían realizarse a partir de la MLG en vez de utilizar la fórmula anterior centrada en la relación con el peso.

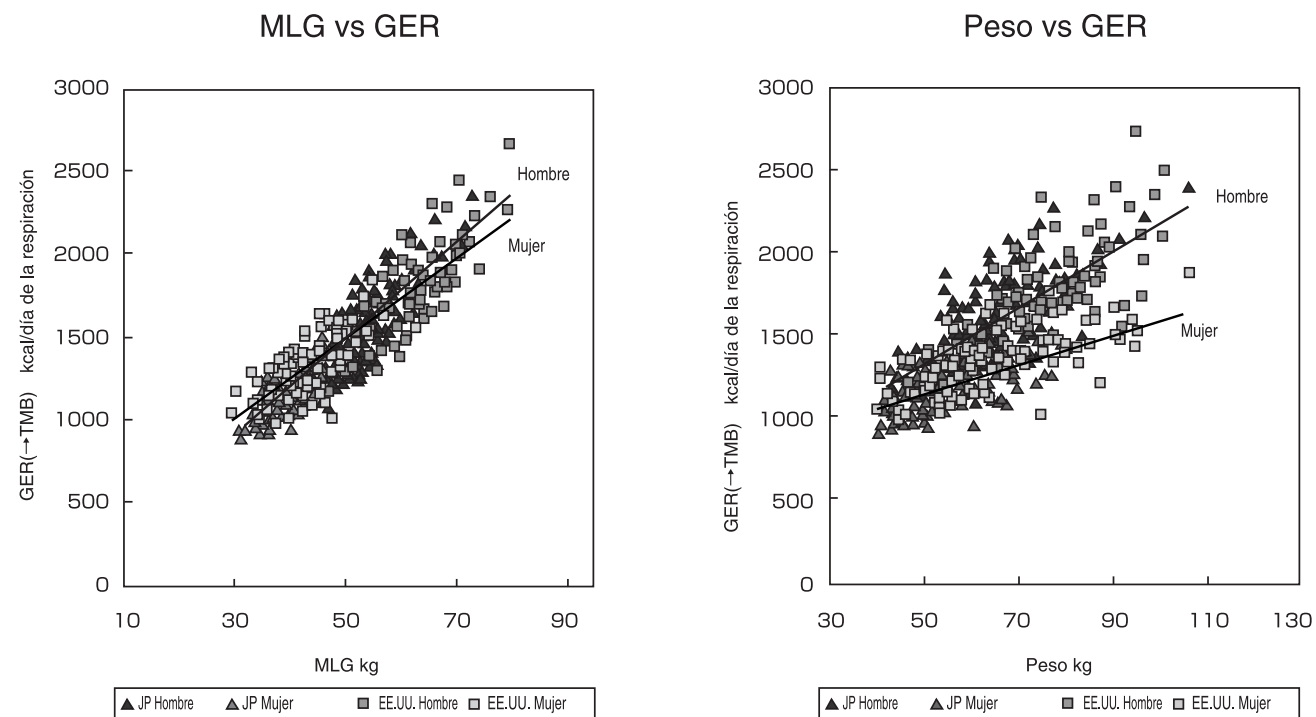

**<Gráfica 2> Comparación de los valores de la MB según el modelo de regresión múltiple y el análisis de la respiración de TANITA.**

(Presentado en la Semana de la Nutrición “Nutrition Week”, celebrada en San Diego en el 2002)

La fórmula de regresión actual de la MB es una fórmula que se basa en el principio de utilizar el valor de la MLG resultante de la medición de la composición corporal según el AIB. Se muestra una estrecha relación entre el valor de la MB basado en el análisis de la respiración GER o  $R=0,9$  ( $p<0,0001$ ). Estos resultados fueron presentados en la Primera Semana Annual de la Nutrición “First Annual Nutrition Week” (American College of Nutrition, American Society for Clinical Nutrition, American Society for Parenteral and Enteral Nutrition, North American Association for the Study of Obesity) celebrada en San Diego en el 2002.

**NOTA:** Este modelo ha sido calibrado para usuarios con edades comprendidas entre los 18 y los 84 años. Los usuarios cuyas edades se encuentren fuera de este margen de edad podrían obtener lecturas imprecisas.

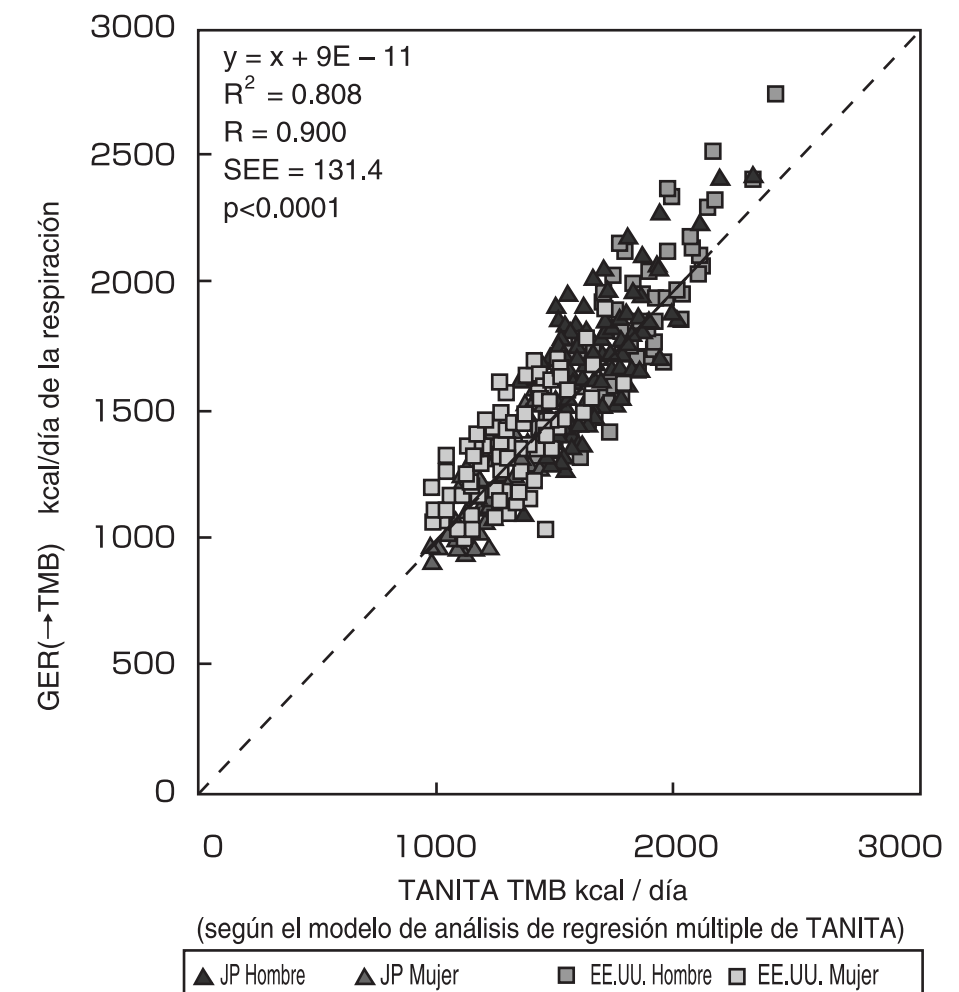

# Especificaciones

|                                              |                                                                        |                                                                                        |                                             |
|----------------------------------------------|------------------------------------------------------------------------|----------------------------------------------------------------------------------------|---------------------------------------------|
| <b>Modelo</b>                                | SC-331S                                                                |                                                                                        |                                             |
| <b>Fuente de suministro eléctrico</b>        | Adaptador AC (incluido) Center Minus                                   |                                                                                        |                                             |
|                                              | Voltaje de entrada: 100-240 VAC 50/60 Hz 1,5A Voltaje de salida: 7 VDC |                                                                                        |                                             |
|                                              | Corriente de régimen: 4 A Voltaje de entrada en vacío: 7VDC            |                                                                                        |                                             |
| <b>Consumo eléctrico</b>                     | 28 W                                                                   |                                                                                        |                                             |
| <b>Medición de impedancia</b>                | <b>Sistema de medición</b>                                             | Análisis de impedancia bioeléctrica tetra polar                                        |                                             |
|                                              | <b>Frecuencia de medición</b>                                          | 50 kHz                                                                                 |                                             |
|                                              | <b>Corriente de medición</b>                                           | 90 µA                                                                                  |                                             |
|                                              | <b>Material de electrodos</b>                                          | Almohadillas para los pies de acero inoxidable activadas mediante contacto por presión |                                             |
|                                              | <b>Estilo de medición</b>                                              | Entre ambos pies                                                                       |                                             |
|                                              | <b>Rango de medición</b>                                               | 150 - 1200Ω                                                                            |                                             |
| <b>Medición de peso</b>                      | <b>Precisión al primer calibrado</b>                                   | ± 2%                                                                                   |                                             |
|                                              | <b>Sistema de medición</b>                                             | Célula de carga indicadora de tensión                                                  |                                             |
|                                              | <b>Capacidad máxima / graduación mínima</b>                            | 270 kg / 0,1 kg<br>600 lb / 0,2 lb                                                     |                                             |
| <b>Elementos de información de entrada</b>   | <b>Precisión al primer calibrado</b>                                   | ± 0,2 kg / ± 0,4 lb                                                                    |                                             |
|                                              | <b>Peso de la ropa</b>                                                 | 0 - 10 kg / incrementos de 0,1 kg                                                      | incrementos de 0 - 20 lb / 0,2 lb           |
|                                              | <b>Sexo</b>                                                            | Hombre / mujer                                                                         |                                             |
|                                              | <b>Tipo de estructura corporal</b>                                     | Estándar (5 - 99 años) / Atlético (18 - 99 años)                                       |                                             |
|                                              | <b>Edad</b>                                                            | 5 - 99 años de edad / incrementos de 1 año                                             |                                             |
|                                              | <b>Altura</b>                                                          | 90 - 249,9 cm / incrementos de 0,1 cm                                                  | 3 ft - 7 ft 11,5 in / incrementos de 0,5 in |
| <b>Porcentaje de grasa corporal objetivo</b> | 4 - 55 %                                                               |                                                                                        |                                             |

|                                                        |                                               |                                              |                                                  |                                             |
|--------------------------------------------------------|-----------------------------------------------|----------------------------------------------|--------------------------------------------------|---------------------------------------------|
| <b>Elementos de información de salida</b>              | <b>Display</b>                                | <b>Porcentaje de grasa corporal objetivo</b> | 4 - 55 %                                         |                                             |
|                                                        |                                               | <b>Peso</b>                                  | 0 - 270 kg / incrementos de 0,1 kg               | 600lb / incrementos de 0,2 lb               |
|                                                        |                                               | <b>Sexo</b>                                  | Hombre / mujer                                   |                                             |
|                                                        |                                               | <b>Tipo de estructura corporal</b>           | Estándar / Atlético                              |                                             |
|                                                        |                                               | <b>Edad</b>                                  | 5 - 99 años de edad / incrementos de 1 año       |                                             |
|                                                        |                                               | <b>Altura</b>                                | 90 - 249,9 cm / incrementos de 0,1 cm            | 3 ft - 7 ft 11,5 in / incrementos de 0,5 in |
|                                                        |                                               | <b>FAT%</b>                                  | 3 - 75% / 0.1% increments                        |                                             |
|                                                        | <b>Impresión</b>                              | <b>Logo</b>                                  | Logo de TANITA (240 × 64 puntos)                 |                                             |
|                                                        |                                               | <b>Nombre del modelo</b>                     | BC-420MA                                         |                                             |
|                                                        |                                               | <b>Fecha y hora</b>                          | 2005 / 1 / 1 - 2099 / 12 / 31                    |                                             |
|                                                        |                                               | <b>N° de serie</b>                           | 00000000 - 99999999                              |                                             |
|                                                        |                                               | <b>ID</b>                                    | 000000000 - 999999999                            |                                             |
|                                                        |                                               | <b>Tipo de estructura corporal</b>           | Estándar (5 - 99 años) / Atlético (18 - 99 años) |                                             |
|                                                        |                                               | <b>Sexo</b>                                  | Hombre / mujer                                   |                                             |
|                                                        |                                               | <b>Edad</b>                                  | 5 - 99 años de edad / incrementos de 1 año       |                                             |
|                                                        |                                               | <b>Altura</b>                                | 90 - 249,9 cm / incrementos de 0,1 cm            | 3 ft - 7 ft 11,5 in / incrementos de 0,5 in |
|                                                        |                                               | <b>Peso de la ropa</b>                       | 0 - 10 kg / incrementos de 0,1 kg                | 0 - 20 lb / incrementos de 0,2 lb           |
|                                                        |                                               | <b>Peso</b>                                  | 0 - 270 kg / incrementos de 0,1 kg               | 600lb / incrementos de 0,2 lb               |
|                                                        |                                               | <b>Porcentaje de grasa</b>                   | 3 - 75% / incrementos de 0,1%                    |                                             |
|                                                        |                                               | <b>Masa corporal</b>                         | incrementos de 0,1 kg                            | incrementos de 0,2 lb                       |
|                                                        |                                               | <b>Masa Magra</b>                            | incrementos de 0,1 kg                            | incrementos de 0,2 lb                       |
|                                                        |                                               | <b>Masa muscular</b>                         | incrementos de 0,1 kg                            | incrementos de 0,2 lb                       |
|                                                        |                                               | <b>Agua Total</b>                            | incrementos de 0,1 kg                            | incrementos de 0,2 lb                       |
|                                                        |                                               | <b>% Agua Total</b>                          | 15 - 85% / incrementos de 0,1%                   |                                             |
|                                                        |                                               | <b>Masa ósea prevista</b>                    | incrementos de 0,1 kg                            | incrementos de 0,2 lb                       |
|                                                        |                                               | <b>MB</b>                                    | incrementos de 1 kJ / incrementos de 1kcal       |                                             |
|                                                        |                                               | <b>Edad metabólica</b>                       | incrementos de 1 año (12 - 90 años)              |                                             |
| <b>Nivel de grasa visceral</b>                         | incrementos de 1 nivel (nivel 1 - 59)         |                                              |                                                  |                                             |
| <b>BMI</b>                                             | incrementos de 0,1                            |                                              |                                                  |                                             |
| <b>Peso previsto</b>                                   | incrementos de 0,1 kg                         | incrementos de 0,2 lb                        |                                                  |                                             |
| <b>Rango deseable</b>                                  | 3 - 75% / incrementos de 0,1 kg               |                                              |                                                  |                                             |
| <b>Gráfico de porcentaje de grasa</b>                  |                                               |                                              |                                                  |                                             |
| <b>Gráfico de BMI</b>                                  |                                               |                                              |                                                  |                                             |
| <b>Gráfico de nivel de grasa visceral</b>              |                                               |                                              |                                                  |                                             |
| <b>Gráfico de masa muscular</b>                        |                                               |                                              |                                                  |                                             |
| <b>Gráfico de MB</b>                                   |                                               |                                              |                                                  |                                             |
| <b>Evaluación física</b>                               |                                               |                                              |                                                  |                                             |
| <b>Resistencia</b>                                     | 150 - 1200Ω                                   |                                              |                                                  |                                             |
| <b>Display</b>                                         | Pantalla LCD de 3 filas y 5 dígitos           |                                              |                                                  |                                             |
| <b>Interfaz de datos de salida</b>                     | RS-232C (conector hembra de 9 pins D-sub )    |                                              |                                                  |                                             |
| <b>Rango de temperature de uso</b>                     | 0 - 35°C                                      |                                              |                                                  |                                             |
| <b>Humedad relativa</b>                                | 30 - 80% (sin condensación)                   |                                              |                                                  |                                             |
| <b>Peso del equipo (versión de display remoto)</b>     | 6,8 kg                                        | 15,0 lb                                      |                                                  |                                             |
| <b>Peso del equipo (versión de montaje en columna)</b> | 12,1kg                                        | 26,7 lb                                      |                                                  |                                             |
| <b>Tamaño</b>                                          | <b>Plataforma de pesaje</b>                   | 372 × 375 × 101 mm (14,6 × 14,8 × 4,0 in)    |                                                  |                                             |
|                                                        | <b>Altura (versión de montaje en columna)</b> | 1024 mm (40,3in)                             |                                                  |                                             |

E

Quando sea necesario  
(Especificaciones)

E

Quando sea necesario  
(Especificaciones)

USA y Canada

#### Comisión Federal de Comunicaciones y Canadá CIEM comentario

Este equipo ha sido probado y cumple con los límites para un dispositivo digital de Clase B, según la Parte 15 de las normas FCC y canadienses ICES-003. Estos límites están diseñados para proporcionar una protección razonable contra las interferencias perjudiciales en una instalación residencial. Este equipo genera, utiliza y puede irradiar energía de radiofrecuencia y, si no se instala y utiliza de acuerdo con las instrucciones, puede causar interferencias perjudiciales en las comunicaciones de radio. Sin embargo, no hay garantía de que no se produzcan interferencias en una instalación en particular. Si este equipo causa interferencias perjudiciales en la interferencia de radio o televisión, lo que puede determinarse encendiéndolo y apagándolo, se recomienda al usuario que intente corregir la interferencia mediante una o más de las siguientes medidas:

- Cambiar la orientación o ubicación de la antena receptora.
- Aumentar la separación entre el equipo y el receptor.
- Conectar el equipo a un tomacorriente en un circuito diferente de aquel al que está conectado el receptor.
- Consultar con el distribuidor o con un radio o televisión con experiencia con experiencia.

#### Modificaciones

La FCC exige que el usuario sea notificado de que cualquier cambio realizado en este dispositivo que no sea aprobado expresamente por Tanita Corporation podría invalidar el usuario para utilizar el equipo.

### Eliminación

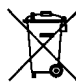

Este equipo es un dispositivo electrónico. No lo deseches junto con los residuos generales; cumpla con las normas regionales de eliminación de equipos eléctricos.

<U.S.A. representative>

## TANITA<sup>®</sup> Corporation of America, Inc.

2625 South Clearbrook Drive, Arlington Heights, Illinois 60005, U.S.A. TEL: 1-847-640-9241 FAX: 1-847-640-9261 <http://www.tanita.com>

<Manufacturer>

## TANITA<sup>®</sup> Corporation

1-14-2, Maeno-cho, Itabashi-ku, Tokyo 174-8630, Japan TEL: +81 (0) 3-3968-7048 FAX: +81 (0) 3-3967-3766 <http://www.tanita.co.jp>

#### TANITA Europe B.V.

Hoogoorddreef 56-E,  
1101 BE Amsterdam, the Netherlands  
TEL: +31-20-560-2970  
FAX: +31-20-560-2988  
<http://www.tanita.eu>

#### TANITA Health Equipment H.K.LTD.

Unit 301-303, Wing On Plaza, 3/F., 62 Mody Rord,  
Tsimshatsui East, Kowloon, Hong Kong  
TEL: +852-2834-3917  
FAX: +852-2838-8667  
[www.tanita.asia](http://www.tanita.asia)

#### TANITA India Private Limited

A-502, Mittal Commercia, Off. M.V. Road(Andheri Kurla Road),  
Marol, Andheri-East, Mumbai 400 059 INDIA  
TEL: +91-22-3192-6107  
FAX: +91-22-2859-9143  
[www.tanita.co.in](http://www.tanita.co.in)

#### TANITA (Shanghai) Trading Co., Ltd.

Room 8005, 877 Huai Hai Zhong Lu, Shanghai,  
The People's Republic of China  
TEL: +86-21-6474-6803  
FAX: +86-21-6474-7901  
[www.tanita.com.cn](http://www.tanita.com.cn)
