# Supplementary material for: The effect of protein supplementation on body muscle mass and fat mass in post-bariatric surgery: a randomized controlled trial (RCT) study protocol
Source: Springer Nature journal article supplement (doi:10.1186/s13690-017-0252-2), 2018-01-22
Supplement: MOESM4 [file 15422392]

Ref. No: MRC/0473/2017  
Date: 8<sup>th</sup> March 2017

**Ms. Sahar Dahawi Alshamari**  
**Senior Clinical Dietitian**  
**Dietetics & Nutrition**  
**Surgery**  
**HGH**

Dear Ms. Sahar,

**Subject: Research Proposal 16433/16 "Protein Supplementation Impact on Body Muscle Mass and Fat Mass in Qataris Post Bariatric Surgery, Randomized Controlled Trails (RCTs)"**

The above titled Research Proposal submitted to the Medical Research Center has been approved to be conducted in HMC provided that the continuing approval from the HMC Institutional Review Board (IRB) is renewed as per the committee terms. The Research Center has acknowledged the IRB approval (Full Board) letter dated 16<sup>th</sup> February 2017.

This research study should be conducted in full accordance with all the applicable sections of the Rules and Regulations for Research at HMC and you should notify the Medical Research Center immediately of any proposed changes in study conduct that may affect the resource utilization at HMC. It is the Principal Investigator's responsibility to obtain review and continued approval if there is any modification to the approved protocol.

A study progress report should be submitted annually and a final report upon study's completion.

We wish you all success and await the results in due course.

Yours sincerely,

  
**Prof. Ibrahim Janahi**  
**Executive Director of Research**  
**Medical Research Center**

Cc:

1. Study Investigators
2. Chairman of HGH Research Committee
