# Supplementary material for: The effect of protein supplementation on body muscle mass and fat mass in post-bariatric surgery: a randomized controlled trial (RCT) study protocol
Source: Springer Nature journal article supplement (doi:10.1186/s13690-017-0252-2), 2018-01-22
Supplement: MOESM5 [file 15422392]

## Dietary supplement

Supplement is a nutrition drink, designed for dietary management after bariatric surgery.

### Dietary supplement instructions:

- Take one can daily, drink it in interval 5-6 times.
- Is ready to drink.
- Shake well before use.
- Don't heat the supplement.
- Keep in refrigerator or in room temperature and when open the bottle it should be used within 24 hrs.

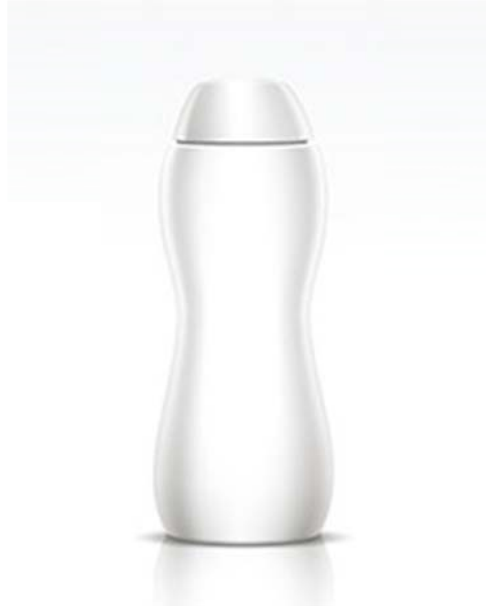

**For any question call Bariatric and Metabolic Surgery Department**

**Phone: 44396792/44396794**

## المكمل الغذائي

المكمل الغذائي شراب مصمم لضبط التغذية بعد جراحة السمنة.

### تعليمات أخذ المكملات الغذائية:

- \* اشرب عبوة واحدة يوميا على 5-6 فترات.
- \* العبوة جاهزه للشرب.
- \* قم بخض العبوة جيداً قبل الشرب.
- \* لا تقم بتسخين المكمل الغذائي.
- \* احفظه مبرداً أو في درجة حرارة الغرفة. يجب شرب العبوة خلال 24 ساعة بعد الفتح.

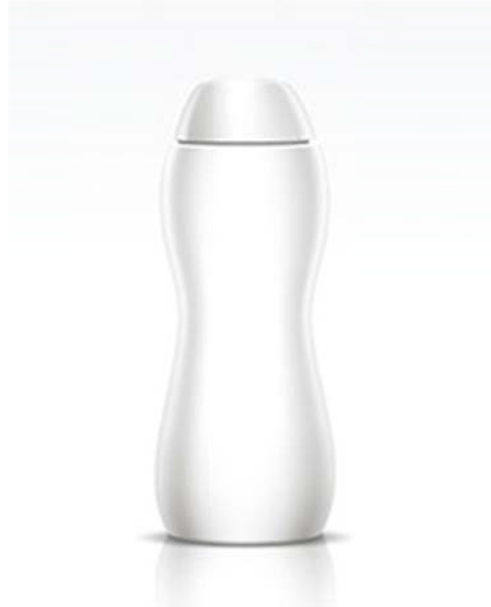

لأي استفسار اتصل بمركز جراحة السمنة والأيض

رقم الهاتف: 44396794/44396792
